# Supplementary material
Source: bioRxiv or medRxiv preprint supplement (https://www.biorxiv.org/highwire/filestream/8517/field_highwire_adjunct_files/0/031724-1.pdf)

# A novel method to model read counts in genomic data to reduce false positive identification of heterozygotes

## Supplemental Material

### Tables

Maximum likelihood, AIC and BIC values for different components in each model.

| CEU 2013 Chromosome 21 |            |             |             |             |             |             |
|------------------------|------------|-------------|-------------|-------------|-------------|-------------|
| Model                  | TH lnL     | PH lnL      | TH AIC      | PH AIC      | TH BIC      | PH BIC      |
| Components 1           | -680227.22 | -1049127.29 | 1360460.44  | 2098260.57  | 1360485.35  | 2098286.28  |
| Components 2           | -679553.35 | -1047190.51 | 1359120.71  | 2094395.02  | 1359178.84  | 2094455.01  |
| Components 3           | -679518.05 | -1046976.22 | 1359058.10  | 2093974.43  | 1359149.44* | 2094068.71  |
| Components 4           | -679503.99 | -1046863.10 | 1359037.99* | 2093756.19  | 1359162.55  | 2093884.75  |
| Components 5           | -679500.25 | -1046801.13 | 1359038.49  | 2093640.26  | 1359196.27  | 2093803.09  |
| Components 6           | -679499.16 | -1046759.39 | 1359044.32  | 2093564.77* | 1359235.31  | 2093761.89* |

  

| CEU 2013 Chromosome 10 |            |            |             |             |             |             |
|------------------------|------------|------------|-------------|-------------|-------------|-------------|
| Model                  | TH lnL     | PH lnL     | TH AIC      | PH AIC      | TH BIC      | PH BIC      |
| Components 1           | -822125.53 | -861877.92 | 1644257.06  | 1723761.83  | 1644282.55  | 1723787.47  |
| Components 2           | -821819.67 | -861134.63 | 1643653.34  | 1722283.25  | 1643712.83* | 1722343.07  |
| Components 3           | -821806.53 | -861095.35 | 1643635.06* | 1722212.71* | 1643728.54  | 1722306.71* |
| Components 4           | -821803.92 | -861092.33 | 1643637.84  | 1722214.65  | 1643765.32  | 1722342.83  |
| Components 5           | -821802.52 | -861088.23 | 1643643.03  | 1722214.47  | 1643804.51  | 1722376.83  |
| Components 6           | -821801.14 | -861086.03 | 1643648.29  | 1722218.06  | 1643843.76  | 1722414.61  |

  

| CEU 2012 Chromosome 21 |             |             |             |             |             |             |
|------------------------|-------------|-------------|-------------|-------------|-------------|-------------|
| Model                  | TH lnL      | PH lnL      | TH AIC      | PH AIC      | TH BIC      | PH BIC      |
| Components 1           | -1295587.45 | -1567598.52 | 2591180.90  | 3135203.04  | 2591205.81  | 3135228.44  |
| Components 2           | -1294765.87 | -1564084.48 | 2589545.74  | 3128182.96  | 2589603.87* | 3128242.23  |
| Components 3           | -1294751.05 | -1563981.27 | 2589524.11  | 3127984.54  | 2589615.44  | 3128077.69  |
| Components 4           | -1294738.61 | -1563903.83 | 2589507.23* | 3127837.65  | 2589631.78  | 3127964.67  |
| Components 5           | -1294735.56 | -1563870.23 | 2589509.11  | 3127778.45  | 2589666.88  | 3127939.35* |
| Components 6           | -1294732.85 | -1563852.35 | 2589511.69  | 3127750.70* | 2589702.67  | 3127945.47  |

  

| CEU 2012 Chromosome 10 |             |             |             |             |             |             |
|------------------------|-------------|-------------|-------------|-------------|-------------|-------------|
| Model                  | TH lnL      | PH lnL      | TH AIC      | PH AIC      | TH BIC      | PH BIC      |
| Components 1           | -1576846.58 | -1681522.38 | 3153699.16  | 3363050.76  | 3153724.69  | 3363076.53  |
| Components 2           | -1576531.60 | -1679609.04 | 3153077.20  | 3359232.08  | 3153136.77* | 3359292.21  |
| Components 3           | -1576517.22 | -1679519.20 | 3153056.44* | 3359060.39  | 3153150.04  | 3359154.88  |
| Components 4           | -1576513.59 | -1679490.33 | 3153057.18  | 3359010.66  | 3153184.83  | 3359139.50* |
| Components 5           | -1576510.84 | -1679484.47 | 3153059.69  | 3359006.94  | 3153221.37  | 3359170.15  |
| Components 6           | -1576508.61 | -1679473.47 | 3153063.22  | 3358992.95* | 3153258.94  | 3359190.51  |

| CEU 2011 Chromosome 21 |             |             |             |             |             |             |
|------------------------|-------------|-------------|-------------|-------------|-------------|-------------|
| Model                  | TH lnL      | PH lnL      | TH AIC      | PH AIC      | TH BIC      | PH BIC      |
| Components 1           | -1295073.11 | -1564321.59 | 2590152.22  | 3128649.18  | 2590177.13  | 3128674.58  |
| Components 2           | -1294248.59 | -1560880.98 | 2588511.18  | 3121775.95  | 2588569.31* | 3121835.22  |
| Components 3           | -1294233.74 | -1560781.60 | 2588489.49  | 3121585.20  | 2588580.83  | 3121678.34  |
| Components 4           | -1294220.12 | -1560704.65 | 2588470.24* | 3121439.29  | 2588594.79  | 3121566.29  |
| Components 5           | -1294216.29 | -1560669.63 | 2588470.58  | 3121377.27  | 2588628.35  | 3121538.13* |
| Components 6           | -1294214.05 | -1560651.10 | 2588474.10  | 3121348.19* | 2588665.08  | 3121542.93  |
| CEU 2011 Chromosome 10 |             |             |             |             |             |             |
| Model                  | TH lnL      | PH lnL      | TH AIC      | PH AIC      | TH BIC      | PH BIC      |
| Components 1           | -1576118.74 | -1680591.96 | 3152243.47  | 3361189.92  | 3152269.00  | 3361215.69  |
| Components 2           | -1575808.42 | -1678712.33 | 3151630.84  | 3357438.67  | 3151690.41* | 3357498.80  |
| Components 3           | -1575793.38 | -1678620.74 | 3151608.77* | 3357263.48  | 3151702.38  | 3357357.97  |
| Components 4           | -1575789.85 | -1678591.80 | 3151609.70  | 3357213.59  | 3151737.34  | 3357342.44* |
| Components 5           | -1575786.15 | -1678585.13 | 3151610.30  | 3357208.25  | 3151771.99  | 3357371.46  |
| Components 6           | -1575785.32 | -1678576.67 | 3151616.63  | 3357199.34* | 3151812.36  | 3357396.90  |
| CEU 2010 Chromosome 21 |             |             |             |             |             |             |
| Model                  | TH lnL      | PH lnL      | TH AIC      | PH AIC      | TH BIC      | PH BIC      |
| Components 1           | -609177.81  | -741752.33  | 1218361.61  | 1483510.67  | 1218386.32  | 1483535.69  |
| Components 2           | -609069.60  | -740874.49  | 1218153.20  | 1481762.98  | 1218210.86* | 1481821.36  |
| Components 3           | -609057.91  | -740685.21  | 1218137.82* | 1481392.42  | 1218228.43  | 1481484.15  |
| Components 4           | -609057.53  | -740660.48  | 1218145.05  | 1481350.95  | 1218268.61  | 1481476.04* |
| Components 5           | -609057.09  | -740641.97  | 1218152.19  | 1481321.95  | 1218308.69  | 1481480.39  |
| Components 6           | -609056.88  | -740630.74  | 1218159.75  | 1481307.48* | 1218349.21  | 1481499.28  |
| CEU 2010 Chromosome 10 |             |             |             |             |             |             |
| Model                  | TH lnL      | PH lnL      | TH AIC      | PH AIC      | TH BIC      | PH BIC      |
| Components 1           | -786319.70  | -838669.52  | 1572645.39  | 1677345.03  | 1572670.77  | 1677370.56  |
| Components 2           | -786283.09  | -838295.21  | 1572580.18  | 1676604.41  | 1572639.38* | 1676663.98  |
| Components 3           | -786279.14  | -838241.95  | 1572580.28  | 1676505.89  | 1572673.32  | 1676599.49* |
| Components 4           | -786272.06  | -838223.33  | 1572574.12* | 1676476.66  | 1572700.98  | 1676604.30  |
| Components 5           | -786271.18  | -838218.88  | 1572580.36  | 1676475.77* | 1572741.05  | 1676637.44  |
| Components 6           | -786271.55  | -838215.94  | 1572589.10  | 1676477.87  | 1572783.63  | 1676673.58  |
| CHM1 Chromosome 21     |             |             |             |             |             |             |
| Model                  | FD lnL      | RD lnL      | FD AIC      | RD AIC      | FD AIC      | RD BIC      |
| Components 1           | -8884.14    | -7705.50    | 17774.29    | 15417.01    | 17799.96    | 15442.68    |
| Components 2           | -8111.63    | -7680.10    | 16237.26    | 15374.20*   | 16297.18*   | 15434.12*   |
| Components 3           | -8101.03    | -7678.67    | 16224.06    | 15379.34    | 16318.21    | 15473.49    |
| Components 4           | -8096.28    | -7678.67    | 16222.57*   | 15387.34    | 16350.96    | 15515.73    |
| Components 5           | -8096.14    | -7678.67    | 16230.28    | 15395.34    | 16392.91    | 15557.96    |
| Components 6           | -8096.45    | -7678.67    | 16238.90    | 15403.34    | 16435.77    | 15600.20    |
| CHM1 Chromosome 10     |             |             |             |             |             |             |
| Model                  | FD lnL      | RD lnL      | FD AIC      | RD AIC      | FD AIC      | RD BIC      |
| Components 1           | -9741.81    | -8820.24    | 19489.62    | 17646.48    | 19515.40    | 17672.26    |
| Components 2           | -8941.66    | -8797.67    | 17897.32    | 17609.34*   | 17957.48*   | 17669.49*   |
| Components 3           | -8932.63    | -8796.54    | 17887.27*   | 17615.07    | 17981.80    | 17709.60    |
| Components 4           | -8931.64    | -8796.51    | 17893.28    | 17623.02    | 18022.18    | 17751.91    |
| Components 5           | -8931.58    | -8796.51    | 17901.17    | 17631.02    | 18064.44    | 17794.29    |
| Components 6           | -8931.63    | -8796.53    | 17909.26    | 17639.07    | 18106.91    | 17836.71    |

Parameter estimation for each model.

| Parameter estimates CEU 2013 Chromosome 21 |             |             |             |                |                |                |           |          |         |
|--------------------------------------------|-------------|-------------|-------------|----------------|----------------|----------------|-----------|----------|---------|
| Model                                      | $\pi_{ref}$ | $\pi_{alt}$ | $\pi_{err}$ | $\alpha_{ref}$ | $\alpha_{alt}$ | $\alpha_{err}$ | $\varphi$ | $p$      | ML-P    |
| Multinomial                                | 0.5         | 0.5         | 0.000741    | NA             | NA             | NA             | NA        | NA       | NA      |
| Multinomial w/bias                         | 0.503       | 0.496       | 0.000741    | NA             | NA             | NA             | NA        | NA       | NA      |
| CEU13 M1 TH                                | 0.504       | 0.496       | 0.000416    | 57.4           | 56.5           | 0.0474         | 0.0087    | 1        | 1       |
| CEU13 M1 PH                                | 0.528       | 0.471       | 0.00098     | 10.6           | 9.47           | 0.0197         | 0.0474    | 1        | 1       |
| CEU13 M2 TH                                | 0.504       | 0.496       | 0.000334    | 682            | 671            | 0.453          | 0.000738  | 0.96     | 0.815   |
|                                            | 0.501       | 0.496       | 0.00269     | 4.68           | 4.63           | 0.0251         | 0.0968    | 0.0397   | 0.185   |
| CEU13 M2 PH                                | 0.499       | 0.5         | 0.000362    | Inf            | Inf            | Inf            | 0         | 0.578    | 0.701   |
|                                            | 0.561       | 0.437       | 0.00186     | 5.98           | 4.67           | 0.0199         | 0.0857    | 0.422    | 0.299   |
| CEU13 M3 TH                                | 0.504       | 0.496       | 0.000353    | 2.05e+03       | 2.02e+03       | 1.43           | 0.000246  | 0.939    | 0.783   |
|                                            | 0.508       | 0.491       | 0.000526    | 6.86           | 6.64           | 0.00711        | 0.0689    | 0.0604   | 0.213   |
|                                            | 0.239       | 0.483       | 0.278       | 3.41           | 6.88           | 3.97           | 0.0656    | 0.000587 | 0.00412 |
| CEU13 M3 PH                                | 0.505       | 0.495       | 0.000352    | 123            | 120            | 0.0854         | 0.0041    | 0.742    | 0.702   |
|                                            | 0.493       | 0.503       | 0.00383     | 4.6            | 4.7            | 0.0358         | 0.0967    | 0.163    | 0.124   |
|                                            | 0.747       | 0.252       | 0.000518    | 108            | 36.6           | 0.0751         | 0.00686   | 0.0948   | 0.174   |
| CEU13 M4 TH                                | 0.503       | 0.496       | 0.000352    | 383            | 377            | 0.267          | 0.00131   | 0.986    | 0.804   |
|                                            | 0.725       | 0.275       | 1.88e-13    | 193            | 73.3           | 5.01e-11       | 0.00374   | 0.00889  | 0.118   |
|                                            | 0.243       | 0.757       | 0.00067     | 67             | 209            | 0.185          | 0.00361   | 0.00474  | 0.0733  |
|                                            | 0.254       | 0.488       | 0.257       | 3.39           | 6.52           | 3.43           | 0.0697    | 0.000683 | 0.00539 |
| CEU13 M4 PH                                | 0.504       | 0.496       | 0.000401    | Inf            | Inf            | Inf            | 0         | 0.596    | 0.677   |
|                                            | 0.524       | 0.474       | 0.00126     | 6.99           | 6.33           | 0.0167         | 0.0698    | 0.346    | 0.185   |
|                                            | 0.774       | 0.225       | 0.000518    | Inf            | Inf            | Inf            | 0         | 0.0551   | 0.127   |
|                                            | 0.318       | 0.42        | 0.263       | 3.51           | 4.64           | 2.91           | 0.0829    | 0.0024   | 0.0106  |
| CEU13 M5 TH                                | 0.504       | 0.496       | 0.000346    | 387            | 381            | 0.265          | 0.0013    | 0.985    | 0.738   |
|                                            | 0.741       | 0.259       | 7.19e-14    | 2.24e+03       | 783            | 2.17e-10       | 0.000331  | 0.00751  | 0.0976  |
|                                            | 0.226       | 0.774       | 7.87e-14    | 137            | 467            | 4.75e-11       | 0.00165   | 0.00336  | 0.0114  |
|                                            | 0.328       | 0.669       | 0.00311     | Inf            | Inf            | Inf            | 0         | 0.00296  | 0.15    |
|                                            | 0.254       | 0.488       | 0.258       | 3.4            | 6.54           | 3.45           | 0.0695    | 0.000682 | 0.00248 |
| CEU13 M5 PH                                | 0.499       | 0.501       | 0.00037     | 361            | 362            | 0.267          | 0.00138   | 0.726    | 0.519   |
|                                            | 0.643       | 0.356       | 0.000753    | 74.4           | 41.2           | 0.0871         | 0.00857   | 0.13     | 0.225   |
|                                            | 0.363       | 0.636       | 0.000941    | 9.23           | 16.2           | 0.0239         | 0.0378    | 0.0737   | 0.159   |
|                                            | 0.781       | 0.218       | 0.00035     | Inf            | Inf            | Inf            | 0         | 0.0649   | 0.0814  |
|                                            | 0.416       | 0.41        | 0.174       | 3.51           | 3.46           | 1.46           | 0.106     | 0.00491  | 0.0161  |
| CEU13 M6 TH                                | 0.508       | 0.492       | 0.000325    | 813            | 788            | 0.52           | 0.000624  | 0.905    | 0.493   |
|                                            | 0.453       | 0.546       | 0.000558    | Inf            | Inf            | Inf            | 0         | 0.0807   | 0.305   |
|                                            | 0.732       | 0.268       | 2.84e-13    | 342            | 125            | 1.32e-10       | 0.00214   | 0.00827  | 0.106   |
|                                            | 0.222       | 0.778       | 8.79e-14    | 359            | 1.26e+03       | 1.42e-10       | 0.000617  | 0.00318  | 0.01    |
|                                            | 0.316       | 0.68        | 0.00356     | Inf            | Inf            | Inf            | 0         | 0.00194  | 0.0832  |
|                                            | 0.258       | 0.489       | 0.253       | 3.38           | 6.39           | 3.31           | 0.0711    | 0.000701 | 0.00291 |
| CEU13 M6 PH                                | 0.501       | 0.499       | 0.000336    | 5.94e+03       | 5.91e+03       | 3.98           | 8.44e-05  | 0.709    | 0.46    |
|                                            | 0.638       | 0.361       | 0.000751    | 74.6           | 42.2           | 0.0878         | 0.00848   | 0.138    | 0.224   |
|                                            | 0.372       | 0.627       | 0.00066     | 169            | 286            | 0.3            | 0.00219   | 0.0681   | 0.194   |
|                                            | 0.781       | 0.219       | 0.000349    | Inf            | Inf            | Inf            | 0         | 0.0662   | 0.0825  |
|                                            | 0.215       | 0.785       | 0.000288    | 97.9           | 357            | 0.131          | 0.00219   | 0.0129   | 0.0245  |
|                                            | 0.419       | 0.421       | 0.16        | 3.49           | 3.5            | 1.33           | 0.107     | 0.00549  | 0.016   |

| Parameter estimates CEU 2013 Chromosome 10 |             |             |             |                |                |                |           |          |          |
|--------------------------------------------|-------------|-------------|-------------|----------------|----------------|----------------|-----------|----------|----------|
| Model                                      | $\pi_{ref}$ | $\pi_{alt}$ | $\pi_{err}$ | $\alpha_{ref}$ | $\alpha_{alt}$ | $\alpha_{err}$ | $\varphi$ | $p$      | ML-P     |
| Multinomial                                | 0.5         | 0.5         | 0.000449    | NA             | NA             | NA             | NA        | NA       | NA       |
| Multinomial w/bias                         | 0.502       | 0.497       | 0.000449    | NA             | NA             | NA             | NA        | NA       | NA       |
| CEU13 M1 TH                                | 0.502       | 0.497       | 0.000369    | 149            | 148            | 0.11           | 0.00335   | 1        | 1        |
| CEU13 M1 PH                                | 0.503       | 0.496       | 0.000447    | 73.3           | 72.3           | 0.0652         | 0.00682   | 1        | 1        |
| CEU13 M2 TH                                | 0.502       | 0.497       | 0.000336    | 1.17e+03       | 1.16e+03       | 0.786          | 0.000428  | 0.992    | 0.848    |
|                                            | 0.504       | 0.49        | 0.00621     | 3.55           | 3.45           | 0.0438         | 0.124     | 0.00754  | 0.152    |
| CEU13 M2 PH                                | 0.503       | 0.497       | 0.000328    | 768            | 759            | 0.501          | 0.000655  | 0.976    | 0.845    |
|                                            | 0.511       | 0.48        | 0.00914     | 3.89           | 3.65           | 0.0695         | 0.116     | 0.0239   | 0.155    |
| CEU13 M3 TH                                | 0.502       | 0.498       | 0.000343    | 4.87e+03       | 4.82e+03       | 3.32           | 0.000103  | 0.981    | 0.795    |
|                                            | 0.513       | 0.487       | 0.000488    | 7.23           | 6.85           | 0.00687        | 0.0663    | 0.019    | 0.198    |
|                                            | 0.301       | 0.427       | 0.272       | 3.19           | 4.53           | 2.88           | 0.0862    | 0.000283 | 0.00676  |
| CEU13 M3 PH                                | 0.502       | 0.497       | 0.000342    | Inf            | Inf            | Inf            | 0         | 0.95     | 0.784    |
|                                            | 0.523       | 0.476       | 0.00147     | 7.66           | 6.97           | 0.0215         | 0.0639    | 0.0492   | 0.205    |
|                                            | 0.299       | 0.485       | 0.216       | 3.12           | 5.06           | 2.25           | 0.0875    | 0.00121  | 0.011    |
| CEU13 M4 TH                                | 0.502       | 0.498       | 0.000342    | 1.14e+03       | 1.13e+03       | 0.775          | 0.000441  | 0.994    | 0.774    |
|                                            | 0.408       | 0.591       | 0.00119     | 5.39           | 7.81           | 0.0157         | 0.0703    | 0.00392  | 0.136    |
|                                            | 0.748       | 0.252       | 1.35e-13    | 5.61e+07       | 1.89e+07       | 1.01e-05       | 1.33e-08  | 0.00208  | 0.0827   |
|                                            | 0.308       | 0.427       | 0.265       | 3.2            | 4.43           | 2.76           | 0.0878    | 0.000294 | 0.00742  |
| CEU13 M4 PH                                | 0.502       | 0.497       | 0.000346    | Inf            | Inf            | Inf            | 0         | 0.951    | 0.741    |
|                                            | 0.529       | 0.47        | 0.000996    | 7.91           | 7.03           | 0.0149         | 0.0627    | 0.0464   | 0.132    |
|                                            | 0.319       | 0.479       | 0.202       | 3.1            | 4.65           | 1.97           | 0.0933    | 0.00137  | 0.00997  |
|                                            | 0.298       | 0.698       | 0.00406     | Inf            | Inf            | Inf            | 0         | 0.00113  | 0.117    |
| CEU13 M5 TH                                | 0.502       | 0.498       | 0.000341    | 1.36e+03       | 1.35e+03       | 0.924          | 0.000369  | 0.994    | 0.749    |
|                                            | 0.728       | 0.272       | 1.97e-13    | 1.35e+03       | 505            | 3.65e-10       | 0.000539  | 0.0028   | 0.102    |
|                                            | 0.392       | 0.608       | 9.51e-12    | 4.24           | 6.57           | 1.03e-10       | 0.0847    | 0.00201  | 0.000689 |
|                                            | 0.317       | 0.681       | 0.00164     | Inf            | Inf            | Inf            | 0         | 0.00122  | 0.141    |
|                                            | 0.319       | 0.433       | 0.247       | 3.22           | 4.37           | 2.49           | 0.0903    | 0.000325 | 0.00687  |
| CEU13 M5 PH                                | 0.501       | 0.498       | 0.000343    | 6.68e+03       | 6.63e+03       | 4.57           | 7.51e-05  | 0.963    | 0.669    |
|                                            | 0.601       | 0.398       | 0.000833    | 16.6           | 11             | 0.0231         | 0.0349    | 0.0293   | 0.196    |
|                                            | 0.3         | 0.698       | 0.00146     | Inf            | Inf            | Inf            | 0         | 0.00428  | 0.119    |
|                                            | 0.336       | 0.477       | 0.186       | 3.15           | 4.48           | 1.75           | 0.0964    | 0.00159  | 0.012    |
|                                            | 0.357       | 0.643       | 1.21e-11    | 3.67           | 6.61           | 1.24e-10       | 0.0886    | 0.00147  | 0.00392  |
| CEU13 M6 TH                                | 0.502       | 0.498       | 0.000336    | 7.03e+03       | 6.97e+03       | 4.71           | 7.14e-05  | 0.99     | 0.66     |
|                                            | 0.676       | 0.324       | 2.72e-13    | 55.9           | 26.8           | 2.25e-11       | 0.0119    | 0.00565  | 0.162    |
|                                            | 0.333       | 0.666       | 0.000985    | Inf            | Inf            | Inf            | 0         | 0.00271  | 0.162    |
|                                            | 0.264       | 0.736       | 6.06e-13    | 5.36           | 14.9           | 1.23e-11       | 0.047     | 0.000669 | 0.00513  |
|                                            | 0.296       | 0.422       | 0.283       | 3.26           | 4.65           | 3.12           | 0.0831    | 0.000277 | 0.000303 |
|                                            | 0.491       | 0.471       | 0.0384      | Inf            | Inf            | Inf            | 0         | 0.000235 | 0.0108   |
| CEU13 M6 PH                                | 0.502       | 0.498       | 0.000349    | 2.7e+04        | 2.68e+04       | 18.8           | 1.86e-05  | 0.96     | 0.655    |
|                                            | 0.604       | 0.396       | 1.66e-10    | 18.7           | 12.3           | 5.14e-09       | 0.0313    | 0.0252   | 0.208    |
|                                            | 0.47        | 0.53        | 3.59e-08    | 5.49           | 6.2            | 4.2e-07        | 0.0788    | 0.0105   | 0.00718  |
|                                            | 0.301       | 0.697       | 0.0025      | Inf            | Inf            | Inf            | 0         | 0.00262  | 0.119    |
|                                            | 0.558       | 0.367       | 0.0749      | 11.3           | 7.43           | 1.52           | 0.0471    | 0.00113  | 0.0106   |
|                                            | 0.254       | 0.517       | 0.228       | 3.4            | 6.92           | 3.05           | 0.0695    | 0.000998 | 0.00111  |

| Parameter estimates CEU 2013 Chromosome 21 |             |             |             |                |                |                |           |          |         |
|--------------------------------------------|-------------|-------------|-------------|----------------|----------------|----------------|-----------|----------|---------|
| Model                                      | $\pi_{ref}$ | $\pi_{alt}$ | $\pi_{err}$ | $\alpha_{ref}$ | $\alpha_{alt}$ | $\alpha_{err}$ | $\varphi$ | $p$      | ML-P    |
| Multinomial                                | 0.5         | 0.5         | 0.000741    | NA             | NA             | NA             | NA        | NA       | NA      |
| Multinomial w/bias                         | 0.503       | 0.496       | 0.000741    | NA             | NA             | NA             | NA        | NA       | NA      |
| CEU13 M1 TH                                | 0.504       | 0.496       | 0.000416    | 57.4           | 56.5           | 0.0474         | 0.0087    | 1        | 1       |
| CEU13 M1 PH                                | 0.528       | 0.471       | 0.00098     | 10.6           | 9.47           | 0.0197         | 0.0474    | 1        | 1       |
| CEU13 M2 TH                                | 0.504       | 0.496       | 0.000334    | 682            | 671            | 0.453          | 0.000738  | 0.96     | 0.815   |
|                                            | 0.501       | 0.496       | 0.00269     | 4.68           | 4.63           | 0.0251         | 0.0968    | 0.0397   | 0.185   |
| CEU13 M2 PH                                | 0.499       | 0.5         | 0.000362    | Inf            | Inf            | Inf            | 0         | 0.578    | 0.701   |
|                                            | 0.561       | 0.437       | 0.00186     | 5.98           | 4.67           | 0.0199         | 0.0857    | 0.422    | 0.299   |
| CEU13 M3 TH                                | 0.504       | 0.496       | 0.000353    | 2.05e+03       | 2.02e+03       | 1.43           | 0.000246  | 0.939    | 0.783   |
|                                            | 0.508       | 0.491       | 0.000526    | 6.86           | 6.64           | 0.00711        | 0.0689    | 0.0604   | 0.213   |
|                                            | 0.239       | 0.483       | 0.278       | 3.41           | 6.88           | 3.97           | 0.0656    | 0.000587 | 0.00412 |
| CEU13 M3 PH                                | 0.505       | 0.495       | 0.000352    | 123            | 120            | 0.0854         | 0.0041    | 0.742    | 0.702   |
|                                            | 0.493       | 0.503       | 0.00383     | 4.6            | 4.7            | 0.0358         | 0.0967    | 0.163    | 0.124   |
|                                            | 0.747       | 0.252       | 0.000518    | 108            | 36.6           | 0.0751         | 0.00686   | 0.0948   | 0.174   |
| CEU13 M4 TH                                | 0.503       | 0.496       | 0.000352    | 383            | 377            | 0.267          | 0.00131   | 0.986    | 0.804   |
|                                            | 0.725       | 0.275       | 1.88e-13    | 193            | 73.3           | 5.01e-11       | 0.00374   | 0.00889  | 0.118   |
|                                            | 0.243       | 0.757       | 0.00067     | 67             | 209            | 0.185          | 0.00361   | 0.00474  | 0.0733  |
|                                            | 0.254       | 0.488       | 0.257       | 3.39           | 6.52           | 3.43           | 0.0697    | 0.000683 | 0.00539 |
| CEU13 M4 PH                                | 0.504       | 0.496       | 0.000401    | Inf            | Inf            | Inf            | 0         | 0.596    | 0.677   |
|                                            | 0.524       | 0.474       | 0.00126     | 6.99           | 6.33           | 0.0167         | 0.0698    | 0.346    | 0.185   |
|                                            | 0.774       | 0.225       | 0.000518    | Inf            | Inf            | Inf            | 0         | 0.0551   | 0.127   |
|                                            | 0.318       | 0.42        | 0.263       | 3.51           | 4.64           | 2.91           | 0.0829    | 0.0024   | 0.0106  |
| CEU13 M5 TH                                | 0.504       | 0.496       | 0.000346    | 387            | 381            | 0.265          | 0.0013    | 0.985    | 0.738   |
|                                            | 0.741       | 0.259       | 7.19e-14    | 2.24e+03       | 783            | 2.17e-10       | 0.000331  | 0.00751  | 0.0976  |
|                                            | 0.226       | 0.774       | 7.87e-14    | 137            | 467            | 4.75e-11       | 0.00165   | 0.00336  | 0.0114  |
|                                            | 0.328       | 0.669       | 0.00311     | Inf            | Inf            | Inf            | 0         | 0.00296  | 0.15    |
|                                            | 0.254       | 0.488       | 0.258       | 3.4            | 6.54           | 3.45           | 0.0695    | 0.000682 | 0.00248 |
| CEU13 M5 PH                                | 0.499       | 0.501       | 0.00037     | 361            | 362            | 0.267          | 0.00138   | 0.726    | 0.519   |
|                                            | 0.643       | 0.356       | 0.000753    | 74.4           | 41.2           | 0.0871         | 0.00857   | 0.13     | 0.225   |
|                                            | 0.363       | 0.636       | 0.000941    | 9.23           | 16.2           | 0.0239         | 0.0378    | 0.0737   | 0.159   |
|                                            | 0.781       | 0.218       | 0.00035     | Inf            | Inf            | Inf            | 0         | 0.0649   | 0.0814  |
|                                            | 0.416       | 0.41        | 0.174       | 3.51           | 3.46           | 1.46           | 0.106     | 0.00491  | 0.0161  |
| CEU13 M6 TH                                | 0.508       | 0.492       | 0.000325    | 813            | 788            | 0.52           | 0.000624  | 0.905    | 0.493   |
|                                            | 0.453       | 0.546       | 0.000558    | Inf            | Inf            | Inf            | 0         | 0.0807   | 0.305   |
|                                            | 0.732       | 0.268       | 2.84e-13    | 342            | 125            | 1.32e-10       | 0.00214   | 0.00827  | 0.106   |
|                                            | 0.222       | 0.778       | 8.79e-14    | 359            | 1.26e+03       | 1.42e-10       | 0.000617  | 0.00318  | 0.01    |
|                                            | 0.316       | 0.68        | 0.00356     | Inf            | Inf            | Inf            | 0         | 0.00194  | 0.0832  |
|                                            | 0.258       | 0.489       | 0.253       | 3.38           | 6.39           | 3.31           | 0.0711    | 0.000701 | 0.00291 |
| CEU13 M6 PH                                | 0.501       | 0.499       | 0.000336    | 5.94e+03       | 5.91e+03       | 3.98           | 8.44e-05  | 0.709    | 0.46    |
|                                            | 0.638       | 0.361       | 0.000751    | 74.6           | 42.2           | 0.0878         | 0.00848   | 0.138    | 0.224   |
|                                            | 0.372       | 0.627       | 0.00066     | 169            | 286            | 0.3            | 0.00219   | 0.0681   | 0.194   |
|                                            | 0.781       | 0.219       | 0.000349    | Inf            | Inf            | Inf            | 0         | 0.0662   | 0.0825  |
|                                            | 0.215       | 0.785       | 0.000288    | 97.9           | 357            | 0.131          | 0.00219   | 0.0129   | 0.0245  |
|                                            | 0.419       | 0.421       | 0.16        | 3.49           | 3.5            | 1.33           | 0.107     | 0.00549  | 0.016   |

| Parameter estimates CEU 2013 Chromosome 10 |             |             |             |                |                |                |           |          |          |
|--------------------------------------------|-------------|-------------|-------------|----------------|----------------|----------------|-----------|----------|----------|
| Model                                      | $\pi_{ref}$ | $\pi_{alt}$ | $\pi_{err}$ | $\alpha_{ref}$ | $\alpha_{alt}$ | $\alpha_{err}$ | $\varphi$ | $p$      | ML-P     |
| Multinomial                                | 0.5         | 0.5         | 0.000449    | NA             | NA             | NA             | NA        | NA       | NA       |
| Multinomial w/bias                         | 0.502       | 0.497       | 0.000449    | NA             | NA             | NA             | NA        | NA       | NA       |
| CEU13 M1 TH                                | 0.502       | 0.497       | 0.000369    | 149            | 148            | 0.11           | 0.00335   | 1        | 1        |
| CEU13 M1 PH                                | 0.503       | 0.496       | 0.000447    | 73.3           | 72.3           | 0.0652         | 0.00682   | 1        | 1        |
| CEU13 M2 TH                                | 0.502       | 0.497       | 0.000336    | 1.17e+03       | 1.16e+03       | 0.786          | 0.000428  | 0.992    | 0.848    |
|                                            | 0.504       | 0.49        | 0.00621     | 3.55           | 3.45           | 0.0438         | 0.124     | 0.00754  | 0.152    |
| CEU13 M2 PH                                | 0.503       | 0.497       | 0.000328    | 768            | 759            | 0.501          | 0.000655  | 0.976    | 0.845    |
|                                            | 0.511       | 0.48        | 0.00914     | 3.89           | 3.65           | 0.0695         | 0.116     | 0.0239   | 0.155    |
| CEU13 M3 TH                                | 0.502       | 0.498       | 0.000343    | 4.87e+03       | 4.82e+03       | 3.32           | 0.000103  | 0.981    | 0.795    |
|                                            | 0.513       | 0.487       | 0.000488    | 7.23           | 6.85           | 0.00687        | 0.0663    | 0.019    | 0.198    |
|                                            | 0.301       | 0.427       | 0.272       | 3.19           | 4.53           | 2.88           | 0.0862    | 0.000283 | 0.00676  |
| CEU13 M3 PH                                | 0.502       | 0.497       | 0.000342    | Inf            | Inf            | Inf            | 0         | 0.95     | 0.784    |
|                                            | 0.523       | 0.476       | 0.00147     | 7.66           | 6.97           | 0.0215         | 0.0639    | 0.0492   | 0.205    |
|                                            | 0.299       | 0.485       | 0.216       | 3.12           | 5.06           | 2.25           | 0.0875    | 0.00121  | 0.011    |
| CEU13 M4 TH                                | 0.502       | 0.498       | 0.000342    | 1.14e+03       | 1.13e+03       | 0.775          | 0.000441  | 0.994    | 0.774    |
|                                            | 0.408       | 0.591       | 0.00119     | 5.39           | 7.81           | 0.0157         | 0.0703    | 0.00392  | 0.136    |
|                                            | 0.748       | 0.252       | 1.35e-13    | 5.61e+07       | 1.89e+07       | 1.01e-05       | 1.33e-08  | 0.00208  | 0.0827   |
|                                            | 0.308       | 0.427       | 0.265       | 3.2            | 4.43           | 2.76           | 0.0878    | 0.000294 | 0.00742  |
| CEU13 M4 PH                                | 0.502       | 0.497       | 0.000346    | Inf            | Inf            | Inf            | 0         | 0.951    | 0.741    |
|                                            | 0.529       | 0.47        | 0.000996    | 7.91           | 7.03           | 0.0149         | 0.0627    | 0.0464   | 0.132    |
|                                            | 0.319       | 0.479       | 0.202       | 3.1            | 4.65           | 1.97           | 0.0933    | 0.00137  | 0.00997  |
|                                            | 0.298       | 0.698       | 0.00406     | Inf            | Inf            | Inf            | 0         | 0.00113  | 0.117    |
| CEU13 M5 TH                                | 0.502       | 0.498       | 0.000341    | 1.36e+03       | 1.35e+03       | 0.924          | 0.000369  | 0.994    | 0.749    |
|                                            | 0.728       | 0.272       | 1.97e-13    | 1.35e+03       | 505            | 3.65e-10       | 0.000539  | 0.0028   | 0.102    |
|                                            | 0.392       | 0.608       | 9.51e-12    | 4.24           | 6.57           | 1.03e-10       | 0.0847    | 0.00201  | 0.000689 |
|                                            | 0.317       | 0.681       | 0.00164     | Inf            | Inf            | Inf            | 0         | 0.00122  | 0.141    |
|                                            | 0.319       | 0.433       | 0.247       | 3.22           | 4.37           | 2.49           | 0.0903    | 0.000325 | 0.00687  |
| CEU13 M5 PH                                | 0.501       | 0.498       | 0.000343    | 6.68e+03       | 6.63e+03       | 4.57           | 7.51e-05  | 0.963    | 0.669    |
|                                            | 0.601       | 0.398       | 0.000833    | 16.6           | 11             | 0.0231         | 0.0349    | 0.0293   | 0.196    |
|                                            | 0.3         | 0.698       | 0.00146     | Inf            | Inf            | Inf            | 0         | 0.00428  | 0.119    |
|                                            | 0.336       | 0.477       | 0.186       | 3.15           | 4.48           | 1.75           | 0.0964    | 0.00159  | 0.012    |
|                                            | 0.357       | 0.643       | 1.21e-11    | 3.67           | 6.61           | 1.24e-10       | 0.0886    | 0.00147  | 0.00392  |
| CEU13 M6 TH                                | 0.502       | 0.498       | 0.000336    | 7.03e+03       | 6.97e+03       | 4.71           | 7.14e-05  | 0.99     | 0.66     |
|                                            | 0.676       | 0.324       | 2.72e-13    | 55.9           | 26.8           | 2.25e-11       | 0.0119    | 0.00565  | 0.162    |
|                                            | 0.333       | 0.666       | 0.000985    | Inf            | Inf            | Inf            | 0         | 0.00271  | 0.162    |
|                                            | 0.264       | 0.736       | 6.06e-13    | 5.36           | 14.9           | 1.23e-11       | 0.047     | 0.000669 | 0.00513  |
|                                            | 0.296       | 0.422       | 0.283       | 3.26           | 4.65           | 3.12           | 0.0831    | 0.000277 | 0.000303 |
|                                            | 0.491       | 0.471       | 0.0384      | Inf            | Inf            | Inf            | 0         | 0.000235 | 0.0108   |
| CEU13 M6 PH                                | 0.502       | 0.498       | 0.000349    | 2.7e+04        | 2.68e+04       | 18.8           | 1.86e-05  | 0.96     | 0.655    |
|                                            | 0.604       | 0.396       | 1.66e-10    | 18.7           | 12.3           | 5.14e-09       | 0.0313    | 0.0252   | 0.208    |
|                                            | 0.47        | 0.53        | 3.59e-08    | 5.49           | 6.2            | 4.2e-07        | 0.0788    | 0.0105   | 0.00718  |
|                                            | 0.301       | 0.697       | 0.0025      | Inf            | Inf            | Inf            | 0         | 0.00262  | 0.119    |
|                                            | 0.558       | 0.367       | 0.0749      | 11.3           | 7.43           | 1.52           | 0.0471    | 0.00113  | 0.0106   |
|                                            | 0.254       | 0.517       | 0.228       | 3.4            | 6.92           | 3.05           | 0.0695    | 0.000998 | 0.00111  |

| Parameter estimates CEU 2012 Chromosome 21 |             |             |             |                |                |                |           |          |         |
|--------------------------------------------|-------------|-------------|-------------|----------------|----------------|----------------|-----------|----------|---------|
| Model                                      | $\pi_{ref}$ | $\pi_{alt}$ | $\pi_{err}$ | $\alpha_{ref}$ | $\alpha_{alt}$ | $\alpha_{err}$ | $\varphi$ | $p$      | ML-P    |
| Multinomial                                | 0.5         | 0.5         | 0.000431    | NA             | NA             | NA             | NA        | NA       | NA      |
| Multinomial w/bias                         | 0.51        | 0.49        | 0.000431    | NA             | NA             | NA             | NA        | NA       | NA      |
| CEU12 M1 TH                                | 0.51        | 0.489       | 0.000371    | 124            | 119            | 0.0906         | 0.00408   | 1        | 1       |
| CEU12 M1 PH                                | 0.523       | 0.477       | 0.000712    | 21.9           | 20             | 0.0298         | 0.0233    | 1        | 1       |
| CEU12 M2 TH                                | 0.509       | 0.491       | 0.000315    | 3.95e+03       | 3.81e+03       | 2.44           | 0.000129  | 0.961    | 0.84    |
|                                            | 0.541       | 0.457       | 0.00204     | 6.46           | 5.45           | 0.0244         | 0.0773    | 0.039    | 0.16    |
| CEU12 M2 PH                                | 0.509       | 0.491       | 0.00032     | Inf            | Inf            | Inf            | 0         | 0.772    | 0.77    |
|                                            | 0.566       | 0.432       | 0.00232     | 6.67           | 5.09           | 0.0273         | 0.0782    | 0.228    | 0.23    |
| CEU12 M3 TH                                | 0.509       | 0.491       | 0.000322    | 4.14e+03       | 3.99e+03       | 2.62           | 0.000123  | 0.958    | 0.834   |
|                                            | 0.544       | 0.455       | 0.00101     | 7.31           | 6.12           | 0.0135         | 0.0692    | 0.0417   | 0.163   |
|                                            | 0.294       | 0.498       | 0.207       | 9.51           | 16.1           | 6.69           | 0.03      | 0.000392 | 0.00258 |
| CEU12 M3 PH                                | 0.509       | 0.491       | 0.000311    | 4.07e+03       | 3.93e+03       | 2.49           | 0.000125  | 0.831    | 0.758   |
|                                            | 0.506       | 0.49        | 0.00394     | 4.9            | 4.74           | 0.0381         | 0.0936    | 0.0995   | 0.0874  |
|                                            | 0.703       | 0.296       | 0.00103     | 45.6           | 19.2           | 0.0671         | 0.0152    | 0.0691   | 0.154   |
| CEU12 M4 TH                                | 0.508       | 0.491       | 0.000325    | 916            | 885            | 0.585          | 0.000555  | 0.983    | 0.854   |
|                                            | 0.689       | 0.311       | 0.000515    | 38.3           | 17.3           | 0.0287         | 0.0177    | 0.0135   | 0.104   |
|                                            | 0.257       | 0.743       | 2.62e-14    | 60.5           | 175            | 6.16e-12       | 0.00423   | 0.00261  | 0.0341  |
|                                            | 0.349       | 0.498       | 0.153       | 6.53           | 9.32           | 2.87           | 0.0507    | 0.000667 | 0.00768 |
| CEU12 M4 PH                                | 0.509       | 0.491       | 0.000324    | 1.32e+05       | 1.28e+05       | 84.3           | 3.85e-06  | 0.826    | 0.725   |
|                                            | 0.698       | 0.301       | 0.00123     | 37.3           | 16.1           | 0.0655         | 0.0184    | 0.0887   | 0.158   |
|                                            | 0.463       | 0.535       | 0.0016      | 6.97           | 8.06           | 0.0241         | 0.0623    | 0.083    | 0.11    |
|                                            | 0.409       | 0.363       | 0.228       | 3.88           | 3.44           | 2.16           | 0.0953    | 0.00222  | 0.00776 |
| CEU12 M5 TH                                | 0.506       | 0.493       | 0.000299    | Inf            | Inf            | Inf            | 0         | 0.888    | 0.616   |
|                                            | 0.535       | 0.465       | 0.000612    | 104            | 90.5           | 0.119          | 0.00511   | 0.1      | 0.278   |
|                                            | 0.728       | 0.272       | 0.000184    | 88.5           | 33.1           | 0.0224         | 0.00815   | 0.00841  | 0.0464  |
|                                            | 0.283       | 0.717       | 3.06e-13    | 21.7           | 55             | 2.34e-11       | 0.0129    | 0.00333  | 0.0543  |
|                                            | 0.335       | 0.5         | 0.166       | 6.95           | 10.4           | 3.44           | 0.0459    | 0.000607 | 0.00553 |
| CEU12 M5 PH                                | 0.507       | 0.492       | 0.000313    | Inf            | Inf            | Inf            | 0         | 0.83     | 0.65    |
|                                            | 0.643       | 0.356       | 0.00117     | 40.3           | 22.3           | 0.0732         | 0.0157    | 0.0997   | 0.169   |
|                                            | 0.381       | 0.618       | 0.00127     | 9.92           | 16.1           | 0.0332         | 0.037     | 0.0433   | 0.125   |
|                                            | 0.778       | 0.221       | 0.000457    | Inf            | Inf            | Inf            | 0         | 0.024    | 0.0458  |
|                                            | 0.439       | 0.375       | 0.186       | 3.88           | 3.31           | 1.64           | 0.102     | 0.00302  | 0.0101  |
| CEU12 M6 TH                                | 0.506       | 0.493       | 0.0003      | Inf            | Inf            | Inf            | 0         | 0.933    | 0.629   |
|                                            | 0.575       | 0.425       | 0.00053     | Inf            | Inf            | Inf            | 0         | 0.032    | 0.291   |
|                                            | 0.537       | 0.462       | 0.00136     | 30.5           | 26.2           | 0.0772         | 0.0173    | 0.0259   | 0.0233  |
|                                            | 0.749       | 0.251       | 6.36e-12    | 239            | 80.4           | 2.03e-09       | 0.00312   | 0.0062   | 0.0245  |
|                                            | 0.254       | 0.746       | 1.61e-14    | 80.6           | 237            | 5.12e-12       | 0.00314   | 0.0025   | 0.0296  |
|                                            | 0.324       | 0.501       | 0.176       | 7.4            | 11.5           | 4.02           | 0.0419    | 0.000553 | 0.00335 |
| CEU12 M6 PH                                | 0.507       | 0.493       | 0.00031     | Inf            | Inf            | Inf            | 0         | 0.848    | 0.653   |
|                                            | 0.644       | 0.355       | 0.00099     | 59.2           | 32.6           | 0.091          | 0.0108    | 0.0922   | 0.169   |
|                                            | 0.776       | 0.223       | 0.00044     | Inf            | Inf            | Inf            | 0         | 0.0278   | 0.0455  |
|                                            | 0.348       | 0.651       | 0.000617    | Inf            | Inf            | Inf            | 0         | 0.0223   | 0.105   |
|                                            | 0.22        | 0.78        | 0.000124    | 289            | 1.02e+03       | 0.163          | 0.000761  | 0.00565  | 0.0101  |
|                                            | 0.461       | 0.405       | 0.134       | 3.63           | 3.19           | 1.06           | 0.113     | 0.00447  | 0.0177  |

| Parameter estimates CEU 2012 Chromosome 10 |             |             |             |                |                |                |           |          |          |
|--------------------------------------------|-------------|-------------|-------------|----------------|----------------|----------------|-----------|----------|----------|
| Model                                      | $\pi_{ref}$ | $\pi_{alt}$ | $\pi_{err}$ | $\alpha_{ref}$ | $\alpha_{alt}$ | $\alpha_{err}$ | $\varphi$ | $p$      | ML-P     |
| Multinomial                                | 0.5         | 0.5         | 0.00038     | NA             | NA             | NA             | NA        | NA       | NA       |
| Multinomial w/bias                         | 0.509       | 0.491       | 0.00038     | NA             | NA             | NA             | NA        | NA       | NA       |
| CEU12 M1 TH                                | 0.509       | 0.491       | 0.000346    | 237            | 229            | 0.161          | 0.00214   | 1        | 1        |
| CEU12 M1 PH                                | 0.514       | 0.485       | 0.000481    | 63.9           | 60.3           | 0.0597         | 0.00799   | 1        | 1        |
| CEU12 M2 TH                                | 0.508       | 0.491       | 0.000319    | 919            | 888            | 0.576          | 0.000553  | 0.986    | 0.851    |
|                                            | 0.54        | 0.457       | 0.00305     | 6.56           | 5.56           | 0.037          | 0.076     | 0.0138   | 0.149    |
| CEU12 M2 PH                                | 0.509       | 0.491       | 0.000306    | 2.52e+03       | 2.43e+03       | 1.51           | 0.000202  | 0.918    | 0.822    |
|                                            | 0.572       | 0.425       | 0.00363     | 7.55           | 5.6            | 0.048          | 0.0704    | 0.0818   | 0.178    |
| CEU12 M3 TH                                | 0.508       | 0.492       | 0.00032     | 846            | 819            | 0.533          | 0.0006    | 0.991    | 0.821    |
|                                            | 0.669       | 0.33        | 0.000653    | 88.3           | 43.6           | 0.0862         | 0.00752   | 0.00635  | 0.116    |
|                                            | 0.445       | 0.534       | 0.0206      | 2.74           | 3.29           | 0.127          | 0.14      | 0.00216  | 0.0623   |
| CEU12 M3 PH                                | 0.508       | 0.492       | 0.000319    | Inf            | Inf            | Inf            | 0         | 0.902    | 0.804    |
|                                            | 0.573       | 0.426       | 0.00167     | 10.4           | 7.72           | 0.0302         | 0.0523    | 0.0966   | 0.188    |
|                                            | 0.386       | 0.392       | 0.221       | 4.67           | 4.74           | 2.68           | 0.0764    | 0.00168  | 0.00712  |
| CEU12 M4 TH                                | 0.508       | 0.492       | 0.000321    | 891            | 863            | 0.564          | 0.000569  | 0.991    | 0.76     |
|                                            | 0.666       | 0.333       | 0.000879    | 69.7           | 34.9           | 0.0921         | 0.00946   | 0.00701  | 0.12     |
|                                            | 0.389       | 0.611       | 1.63e-11    | 5.77           | 9.05           | 2.42e-10       | 0.0632    | 0.0019   | 0.103    |
|                                            | 0.396       | 0.473       | 0.131       | 2.81           | 3.35           | 0.933          | 0.123     | 0.000448 | 0.0162   |
| CEU12 M4 PH                                | 0.508       | 0.491       | 0.000329    | 609            | 588            | 0.395          | 0.000834  | 0.957    | 0.8      |
|                                            | 0.686       | 0.313       | 0.00144     | 44.4           | 20.2           | 0.0934         | 0.0152    | 0.0371   | 0.13     |
|                                            | 0.286       | 0.711       | 0.00207     | 17             | 42.3           | 0.123          | 0.0166    | 0.00317  | 0.0628   |
|                                            | 0.424       | 0.388       | 0.188       | 5.25           | 4.8            | 2.32           | 0.0748    | 0.00232  | 0.00735  |
| CEU12 M5 TH                                | 0.509       | 0.491       | 0.000337    | 1.56e+03       | 1.51e+03       | 1.03           | 0.000326  | 0.94     | 0.607    |
|                                            | 0.492       | 0.508       | 2.57e-12    | 68.1           | 70.2           | 3.55e-10       | 0.00718   | 0.0526   | 0.26     |
|                                            | 0.668       | 0.331       | 0.000991    | 68.8           | 34.1           | 0.102          | 0.00961   | 0.00676  | 0.118    |
|                                            | 0.183       | 0.812       | 0.00459     | 40.7           | 181            | 1.02           | 0.00447   | 0.000361 | 0.00679  |
|                                            | 0.413       | 0.418       | 0.17        | 4.2            | 4.25           | 1.73           | 0.0894    | 0.000336 | 0.00832  |
| CEU12 M5 PH                                | 0.509       | 0.491       | 0.000333    | 541            | 521            | 0.354          | 0.00094   | 0.962    | 0.784    |
|                                            | 0.707       | 0.293       | 0.000865    | 84.5           | 35             | 0.104          | 0.00829   | 0.0301   | 0.104    |
|                                            | 0.342       | 0.656       | 0.00228     | 8.95           | 17.2           | 0.0598         | 0.0368    | 0.00493  | 0.0998   |
|                                            | 0.391       | 0.391       | 0.218       | 5.31           | 5.32           | 2.97           | 0.0685    | 0.00183  | 0.00239  |
|                                            | 0.636       | 0.31        | 0.0542      | 117            | 56.9           | 9.94           | 0.00543   | 0.00112  | 0.00937  |
| CEU12 M6 TH                                | 0.508       | 0.492       | 0.000322    | 951            | 921            | 0.604          | 0.000534  | 0.988    | 0.79     |
|                                            | 0.489       | 0.511       | 1.14e-12    | 6.89           | 7.21           | 1.61e-11       | 0.0662    | 0.00581  | 0.0911   |
|                                            | 0.671       | 0.328       | 0.00104     | 91.3           | 44.6           | 0.142          | 0.0073    | 0.00562  | 0.115    |
|                                            | 0.378       | 0.339       | 0.284       | 9.27           | 8.32           | 6.96           | 0.0391    | 0.000127 | 0.000164 |
|                                            | 0.58        | 0.321       | 0.0992      | Inf            | Inf            | Inf            | 0         | 0.000127 | 0.00305  |
| CEU12 M6 PH                                | 0.147       | 0.765       | 0.0884      | Inf            | Inf            | Inf            | 0         | 0.00011  | 0.000873 |
|                                            | 0.508       | 0.492       | 0.000355    | 1.39e+03       | 1.35e+03       | 0.973          | 0.000365  | 0.89     | 0.708    |
|                                            | 0.547       | 0.453       | 3.92e-12    | 29.6           | 24.5           | 2.12e-10       | 0.0182    | 0.088    | 0.195    |
|                                            | 0.747       | 0.252       | 0.000749    | Inf            | Inf            | Inf            | 0         | 0.0156   | 0.0462   |
|                                            | 0.254       | 0.744       | 0.00273     | 25.6           | 75.1           | 0.276          | 0.0098    | 0.00215  | 0.0366   |
|                                            | 0.399       | 0.392       | 0.209       | 5.32           | 5.21           | 2.78           | 0.0699    | 0.00197  | 0.00282  |
|                                            | 0.643       | 0.32        | 0.0371      | 138            | 68.7           | 7.96           | 0.00464   | 0.00182  | 0.0112   |



| Parameter estimates CEU 2011 Chromosome 21 |             |             |             |                |                |                |           |          |         |
|--------------------------------------------|-------------|-------------|-------------|----------------|----------------|----------------|-----------|----------|---------|
| Model                                      | $\pi_{ref}$ | $\pi_{alt}$ | $\pi_{err}$ | $\alpha_{ref}$ | $\alpha_{alt}$ | $\alpha_{err}$ | $\varphi$ | $p$      | ML-P    |
| Multinomial                                | 0.5         | 0.5         | 0.000429    | NA             | NA             | NA             | NA        | NA       | NA      |
| Multinomial w/bias                         | 0.51        | 0.49        | 0.000429    | NA             | NA             | NA             | NA        | NA       | NA      |
| CEU11 M1 TH                                | 0.51        | 0.49        | 0.00037     | 124            | 119            | 0.0901         | 0.00409   | 1        | 1       |
| CEU11 M1 PH                                | 0.522       | 0.477       | 0.000703    | 22.3           | 20.3           | 0.03           | 0.0229    | 1        | 1       |
| CEU11 M2 TH                                | 0.509       | 0.491       | 0.000315    | 3.88e+03       | 3.74e+03       | 2.4            | 0.000131  | 0.961    | 0.842   |
|                                            | 0.541       | 0.457       | 0.00198     | 6.37           | 5.39           | 0.0234         | 0.0782    | 0.0391   | 0.158   |
| CEU11 M2 PH                                | 0.509       | 0.491       | 0.000319    | Inf            | Inf            | Inf            | 0         | 0.773    | 0.77    |
|                                            | 0.564       | 0.433       | 0.00228     | 6.72           | 5.16           | 0.0271         | 0.0775    | 0.227    | 0.23    |
| CEU11 M3 TH                                | 0.509       | 0.491       | 0.000322    | 3.84e+03       | 3.7e+03        | 2.43           | 0.000133  | 0.958    | 0.833   |
|                                            | 0.543       | 0.456       | 0.000915    | 7.18           | 6.03           | 0.0121         | 0.0703    | 0.0416   | 0.164   |
|                                            | 0.3         | 0.497       | 0.203       | 9.02           | 15             | 6.12           | 0.0321    | 0.000408 | 0.00288 |
| CEU11 M3 PH                                | 0.509       | 0.491       | 0.000309    | 1.02e+04       | 9.83e+03       | 6.19           | 4.99e-05  | 0.83     | 0.758   |
|                                            | 0.507       | 0.489       | 0.00381     | 5              | 4.82           | 0.0376         | 0.0921    | 0.102    | 0.0871  |
|                                            | 0.7         | 0.298       | 0.00101     | 45.5           | 19.4           | 0.0659         | 0.0152    | 0.0682   | 0.155   |
| CEU11 M4 TH                                | 0.509       | 0.491       | 0.000325    | 815            | 787            | 0.522          | 0.000623  | 0.985    | 0.872   |
|                                            | 0.702       | 0.298       | 0.00029     | 49.8           | 21.1           | 0.0206         | 0.0139    | 0.0119   | 0.0922  |
|                                            | 0.245       | 0.755       | 1.37e-14    | 330            | 1.02e+03       | 1.85e-11       | 0.000742  | 0.00241  | 0.0265  |
|                                            | 0.357       | 0.494       | 0.149       | 6.3            | 8.7            | 2.63           | 0.0537    | 0.000694 | 0.00901 |
| CEU11 M4 PH                                | 0.509       | 0.491       | 0.000322    | 9.83e+05       | 9.48e+05       | 623            | 5.18e-07  | 0.83     | 0.716   |
|                                            | 0.694       | 0.305       | 0.0012      | 36.1           | 15.9           | 0.0623         | 0.0189    | 0.0928   | 0.16    |
|                                            | 0.449       | 0.549       | 0.00154     | 7.37           | 9.02           | 0.0252         | 0.0574    | 0.0752   | 0.116   |
|                                            | 0.416       | 0.364       | 0.22        | 3.94           | 3.44           | 2.08           | 0.0955    | 0.0023   | 0.008   |
| CEU11 M5 TH                                | 0.507       | 0.492       | 0.000305    | 2.1e+03        | 2.04e+03       | 1.26           | 0.000242  | 0.954    | 0.68    |
|                                            | 0.559       | 0.44        | 0.00106     | 74.7           | 58.8           | 0.141          | 0.00743   | 0.0345   | 0.244   |
|                                            | 0.727       | 0.273       | 4.37e-13    | 85.6           | 32.1           | 5.14e-11       | 0.00843   | 0.00818  | 0.0353  |
|                                            | 0.259       | 0.741       | 3.19e-14    | 48.5           | 138            | 5.96e-12       | 0.00532   | 0.0028   | 0.0363  |
|                                            | 0.332       | 0.501       | 0.167       | 7.09           | 10.7           | 3.56           | 0.0448    | 0.0006   | 0.00462 |
| CEU11 M5 PH                                | 0.507       | 0.492       | 0.000311    | Inf            | Inf            | Inf            | 0         | 0.831    | 0.648   |
|                                            | 0.641       | 0.358       | 0.00113     | 44.3           | 24.8           | 0.0779         | 0.0142    | 0.0979   | 0.17    |
|                                            | 0.379       | 0.62        | 0.00125     | 10.3           | 16.8           | 0.0339         | 0.0356    | 0.0428   | 0.125   |
|                                            | 0.776       | 0.223       | 0.000423    | Inf            | Inf            | Inf            | 0         | 0.0251   | 0.0463  |
|                                            | 0.446       | 0.375       | 0.179       | 3.92           | 3.29           | 1.57           | 0.102     | 0.0031   | 0.0109  |
| CEU11 M6 TH                                | 0.505       | 0.495       | 0.000297    | Inf            | Inf            | Inf            | 0         | 0.915    | 0.589   |
|                                            | 0.562       | 0.438       | 0.000417    | Inf            | Inf            | Inf            | 0         | 0.068    | 0.318   |
|                                            | 0.734       | 0.266       | 1.34e-12    | 124            | 44.9           | 2.26e-10       | 0.00589   | 0.00796  | 0.0325  |
|                                            | 0.522       | 0.472       | 0.00583     | 28.3           | 25.5           | 0.316          | 0.0181    | 0.00559  | 0.0326  |
|                                            | 0.25        | 0.75        | 1.99e-14    | 87.4           | 262            | 6.96e-12       | 0.00285   | 0.00256  | 0.0272  |
|                                            | 0.321       | 0.498       | 0.181       | 7.58           | 11.8           | 4.29           | 0.0406    | 0.000529 | 0.00107 |
| CEU11 M6 PH                                | 0.507       | 0.493       | 0.000309    | Inf            | Inf            | Inf            | 0         | 0.85     | 0.648   |
|                                            | 0.643       | 0.356       | 0.000947    | 70.8           | 39.2           | 0.104          | 0.00901   | 0.0886   | 0.172   |
|                                            | 0.774       | 0.226       | 0.000407    | Inf            | Inf            | Inf            | 0         | 0.0288   | 0.046   |
|                                            | 0.348       | 0.651       | 0.000612    | Inf            | Inf            | Inf            | 0         | 0.0225   | 0.105   |
|                                            | 0.22        | 0.78        | 0.000133    | 2.49e+03       | 8.81e+03       | 1.51           | 8.85e-05  | 0.00557  | 0.0101  |
|                                            | 0.466       | 0.404       | 0.13        | 3.69           | 3.2            | 1.03           | 0.112     | 0.00458  | 0.0183  |

Parameter estimates CEU 2011 Chromosome 10

| Model              | $\pi_{ref}$ | $\pi_{alt}$ | $\pi_{err}$ | $\alpha_{ref}$ | $\alpha_{alt}$ | $\alpha_{err}$ | $\varphi$ | $p$      | ML-P     |
|--------------------|-------------|-------------|-------------|----------------|----------------|----------------|-----------|----------|----------|
| Multinomial        | 0.5         | 0.5         | 0.000381    | NA             | NA             | NA             | NA        | NA       | NA       |
| Multinomial w/bias | 0.509       | 0.491       | 0.000381    | NA             | NA             | NA             | NA        | NA       | NA       |
| CEU11 M1 TH        | 0.509       | 0.491       | 0.000347    | 237            | 229            | 0.162          | 0.00214   | 1        | 1        |
| CEU11 M1 PH        | 0.514       | 0.485       | 0.000481    | 64.4           | 60.8           | 0.0603         | 0.00792   | 1        | 1        |
| CEU11 M2 TH        | 0.508       | 0.491       | 0.000319    | 913            | 883            | 0.573          | 0.000556  | 0.986    | 0.848    |
|                    | 0.542       | 0.455       | 0.00301     | 6.81           | 5.72           | 0.0379         | 0.0737    | 0.0139   | 0.152    |
| CEU11 M2 PH        | 0.509       | 0.491       | 0.000307    | 2.38e+03       | 2.29e+03       | 1.43           | 0.000214  | 0.918    | 0.821    |
|                    | 0.572       | 0.425       | 0.00362     | 7.64           | 5.67           | 0.0484         | 0.0696    | 0.0815   | 0.179    |
| CEU11 M3 TH        | 0.508       | 0.492       | 0.00032     | 837            | 811            | 0.528          | 0.000607  | 0.992    | 0.824    |
|                    | 0.669       | 0.33        | 0.000652    | 95.3           | 46.9           | 0.0928         | 0.00698   | 0.00642  | 0.116    |
|                    | 0.446       | 0.531       | 0.0233      | 2.72           | 3.23           | 0.142          | 0.141     | 0.00194  | 0.0601   |
| CEU11 M3 PH        | 0.508       | 0.492       | 0.00032     | Inf            | Inf            | Inf            | 0         | 0.901    | 0.801    |
|                    | 0.572       | 0.426       | 0.00164     | 10.6           | 7.89           | 0.0305         | 0.0512    | 0.0971   | 0.191    |
|                    | 0.387       | 0.391       | 0.222       | 4.65           | 4.69           | 2.66           | 0.0769    | 0.00167  | 0.00722  |
| CEU11 M4 TH        | 0.508       | 0.492       | 0.000322    | 890            | 862            | 0.564          | 0.00057   | 0.991    | 0.756    |
|                    | 0.666       | 0.333       | 0.000886    | 73.4           | 36.8           | 0.0977         | 0.00899   | 0.0071   | 0.121    |
|                    | 0.397       | 0.603       | 1.01e-11    | 6.08           | 9.23           | 1.55e-10       | 0.0613    | 0.00188  | 0.106    |
|                    | 0.396       | 0.472       | 0.132       | 2.82           | 3.35           | 0.938          | 0.123     | 0.000447 | 0.0161   |
| CEU11 M4 PH        | 0.508       | 0.491       | 0.000331    | 595            | 575            | 0.388          | 0.000854  | 0.958    | 0.802    |
|                    | 0.687       | 0.312       | 0.00141     | 48             | 21.8           | 0.0988         | 0.0141    | 0.0363   | 0.127    |
|                    | 0.288       | 0.71        | 0.00207     | 17.2           | 42.5           | 0.124          | 0.0165    | 0.00309  | 0.063    |
|                    | 0.427       | 0.387       | 0.186       | 5.22           | 4.73           | 2.28           | 0.0756    | 0.00233  | 0.00755  |
| CEU11 M5 TH        | 0.508       | 0.492       | 0.000322    | 882            | 854            | 0.559          | 0.000576  | 0.99     | 0.77     |
|                    | 0.667       | 0.332       | 0.000994    | 73.5           | 36.7           | 0.11           | 0.00898   | 0.00699  | 0.122    |
|                    | 0.414       | 0.586       | 2.73e-12    | 5.83           | 8.27           | 3.84e-11       | 0.0662    | 0.00218  | 0.105    |
|                    | 0.448       | 0.345       | 0.207       | 8.76           | 6.73           | 4.05           | 0.0487    | 0.000235 | 0.00232  |
|                    | 0.146       | 0.765       | 0.0893      | Inf            | Inf            | Inf            | 0         | 0.000106 | 0.000436 |
| CEU11 M5 PH        | 0.509       | 0.491       | 0.000336    | 479            | 462            | 0.317          | 0.00106   | 0.965    | 0.831    |
|                    | 0.71        | 0.289       | 0.000822    | 106            | 43.3           | 0.123          | 0.00665   | 0.0287   | 0.1      |
|                    | 0.279       | 0.718       | 0.00235     | 18.5           | 47.5           | 0.155          | 0.0149    | 0.00284  | 0.0563   |
|                    | 0.394       | 0.389       | 0.217       | 5.3            | 5.24           | 2.91           | 0.0692    | 0.00184  | 0.00254  |
|                    | 0.635       | 0.314       | 0.0516      | 97.9           | 48.3           | 7.96           | 0.00645   | 0.00117  | 0.0105   |
| CEU11 M6 TH        | 0.508       | 0.492       | 0.000337    | 1.4e+03        | 1.35e+03       | 0.927          | 0.000363  | 0.944    | 0.691    |
|                    | 0.513       | 0.487       | 2.24e-06    | 56.7           | 53.7           | 0.000247       | 0.00898   | 0.0495   | 0.144    |
|                    | 0.684       | 0.315       | 0.00123     | 92.7           | 42.7           | 0.167          | 0.00732   | 0.00501  | 0.0863   |
|                    | 0.318       | 0.682       | 5.04e-12    | 6.4            | 13.7           | 1.02e-10       | 0.0473    | 0.00083  | 0.0763   |
|                    | 0.452       | 0.346       | 0.202       | 8.74           | 6.7            | 3.91           | 0.0491    | 0.000247 | 0.00251  |
|                    | 0.146       | 0.765       | 0.0892      | Inf            | Inf            | Inf            | 0         | 0.000107 | 0.000327 |
| CEU11 M6 PH        | 0.508       | 0.492       | 0.000347    | 891            | 862            | 0.609          | 0.00057   | 0.922    | 0.74     |
|                    | 0.567       | 0.433       | 2.62e-12    | 20.4           | 15.6           | 9.45e-11       | 0.027     | 0.0589   | 0.164    |
|                    | 0.746       | 0.253       | 0.000903    | Inf            | Inf            | Inf            | 0         | 0.0134   | 0.0416   |
|                    | 0.257       | 0.74        | 0.00278     | 24             | 69.1           | 0.259          | 0.0106    | 0.00211  | 0.0402   |
|                    | 0.403       | 0.389       | 0.209       | 5.33           | 5.15           | 2.76           | 0.0702    | 0.00197  | 0.00289  |
|                    | 0.643       | 0.32        | 0.0368      | 153            | 75.9           | 8.74           | 0.00419   | 0.0017   | 0.0111   |

| Parameter estimates CEU 2010 Chromosome 21 |             |             |             |                |                |                |           |          |        |
|--------------------------------------------|-------------|-------------|-------------|----------------|----------------|----------------|-----------|----------|--------|
| Model                                      | $\pi_{ref}$ | $\pi_{alt}$ | $\pi_{err}$ | $\alpha_{ref}$ | $\alpha_{alt}$ | $\alpha_{err}$ | $\varphi$ | $p$      | ML-P   |
| Multinomial                                | 0.499       | 0.499       | 0.00228     | NA             | NA             | NA             | NA        | NA       | NA     |
| Multinomial w/bias                         | 0.543       | 0.455       | 0.00228     | NA             | NA             | NA             | NA        | NA       | NA     |
| CEU10 M1 TH                                | 0.543       | 0.454       | 0.00238     | 101            | 84.6           | 0.443          | 0.00535   | 1        | 1      |
| CEU10 M1 PH                                | 0.553       | 0.444       | 0.00322     | 23.5           | 18.9           | 0.137          | 0.023     | 1        | 1      |
| CEU10 M2 TH                                | 0.533       | 0.465       | 0.00225     | 350            | 306            | 1.48           | 0.00152   | 0.922    | 0.718  |
|                                            | 0.67        | 0.327       | 0.0027      | Inf            | Inf            | Inf            | 0         | 0.0783   | 0.282  |
| CEU10 M2 PH                                | 0.535       | 0.462       | 0.0024      | Inf            | Inf            | Inf            | 0         | 0.663    | 0.714  |
|                                            | 0.584       | 0.412       | 0.00415     | 10.8           | 7.59           | 0.0766         | 0.0514    | 0.337    | 0.286  |
| CEU10 M3 TH                                | 0.531       | 0.467       | 0.00216     | 1.1e+03        | 964            | 4.47           | 0.000484  | 0.892    | 0.561  |
|                                            | 0.662       | 0.335       | 0.00268     | Inf            | Inf            | Inf            | 0         | 0.0961   | 0.3    |
|                                            | 0.517       | 0.476       | 0.0079      | 16.3           | 15             | 0.249          | 0.0308    | 0.012    | 0.139  |
| CEU10 M3 PH                                | 0.532       | 0.465       | 0.00218     | 884            | 772            | 3.61           | 0.000602  | 0.797    | 0.642  |
|                                            | 0.695       | 0.302       | 0.00329     | 87.1           | 37.9           | 0.413          | 0.00791   | 0.132    | 0.263  |
|                                            | 0.512       | 0.479       | 0.00831     | 5.77           | 5.4            | 0.0935         | 0.0816    | 0.0709   | 0.0955 |
| CEU10 M4 TH                                | 0.534       | 0.464       | 0.00212     | Inf            | Inf            | Inf            | 0         | 0.754    | 0.398  |
|                                            | 0.517       | 0.481       | 0.00259     | 122            | 114            | 0.615          | 0.0042    | 0.151    | 0.272  |
|                                            | 0.664       | 0.334       | 0.00273     | Inf            | Inf            | Inf            | 0         | 0.0939   | 0.268  |
|                                            | 0.481       | 0.46        | 0.0583      | 16.7           | 16             | 2.02           | 0.028     | 0.000685 | 0.0624 |
| CEU10 M4 PH                                | 0.532       | 0.465       | 0.00221     | 392            | 343            | 1.63           | 0.00135   | 0.832    | 0.584  |
|                                            | 0.696       | 0.301       | 0.00324     | 77.5           | 33.6           | 0.361          | 0.0089    | 0.145    | 0.247  |
|                                            | 0.343       | 0.653       | 0.00423     | 13.4           | 25.5           | 0.165          | 0.0249    | 0.0193   | 0.122  |
|                                            | 0.54        | 0.351       | 0.109       | 7.28           | 4.74           | 1.47           | 0.069     | 0.0038   | 0.0472 |
| CEU10 M5 TH                                | 0.534       | 0.464       | 0.002       | 3.52e+04       | 3.06e+04       | 132            | 1.52e-05  | 0.782    | 0.298  |
|                                            | 0.5         | 0.497       | 0.00295     | 206            | 205            | 1.21           | 0.00242   | 0.106    | 0.332  |
|                                            | 0.63        | 0.366       | 0.00426     | Inf            | Inf            | Inf            | 0         | 0.0655   | 0.156  |
|                                            | 0.682       | 0.317       | 0.0016      | Inf            | Inf            | Inf            | 0         | 0.046    | 0.157  |
|                                            | 0.491       | 0.459       | 0.0506      | 22.7           | 21.2           | 2.34           | 0.0212    | 0.00105  | 0.0569 |
| CEU10 M5 PH                                | 0.524       | 0.474       | 0.00209     | 5.93e+03       | 5.36e+03       | 23.6           | 8.84e-05  | 0.729    | 0.459  |
|                                            | 0.618       | 0.379       | 0.00285     | 201            | 123            | 0.926          | 0.00306   | 0.176    | 0.248  |
|                                            | 0.738       | 0.259       | 0.00256     | 311            | 109            | 1.08           | 0.00237   | 0.0688   | 0.124  |
|                                            | 0.344       | 0.652       | 0.00428     | 13.3           | 25.1           | 0.165          | 0.0253    | 0.0194   | 0.115  |
|                                            | 0.563       | 0.36        | 0.0772      | 7.73           | 4.94           | 1.06           | 0.0679    | 0.00639  | 0.0534 |
| CEU10 M6 TH                                | 0.531       | 0.467       | 0.00215     | 1.95e+03       | 1.72e+03       | 7.91           | 0.000272  | 0.882    | 0.378  |
|                                            | 0.658       | 0.339       | 0.00268     | Inf            | Inf            | Inf            | 0         | 0.0567   | 0.152  |
|                                            | 0.663       | 0.334       | 0.00258     | Inf            | Inf            | Inf            | 0         | 0.0446   | 0.133  |
|                                            | 0.461       | 0.537       | 0.00272     | 90.8           | 106            | 0.536          | 0.00505   | 0.0143   | 0.271  |
|                                            | 0.55        | 0.413       | 0.0369      | 244            | 183            | 16.4           | 0.00225   | 0.00175  | 0.0532 |
|                                            | 0.393       | 0.538       | 0.0689      | 9.43           | 12.9           | 1.65           | 0.04      | 0.000243 | 0.0134 |
| CEU10 M6 PH                                | 0.527       | 0.471       | 0.00207     | Inf            | Inf            | Inf            | 0         | 0.741    | 0.404  |
|                                            | 0.624       | 0.373       | 0.00296     | 178            | 106            | 0.844          | 0.00349   | 0.159    | 0.24   |
|                                            | 0.74        | 0.257       | 0.0025      | 353            | 123            | 1.19           | 0.00209   | 0.0652   | 0.118  |
|                                            | 0.398       | 0.599       | 0.00284     | 89.4           | 135            | 0.637          | 0.00443   | 0.0226   | 0.171  |
|                                            | 0.551       | 0.378       | 0.0703      | 6.89           | 4.73           | 0.879          | 0.0741    | 0.00754  | 0.0525 |
|                                            | 0.242       | 0.756       | 0.00257     | 77.1           | 241            | 0.821          | 0.00312   | 0.00507  | 0.0146 |

Parameter estimates CEU 2010 Chromosome 10

| Model              | $\pi_{ref}$ | $\pi_{alt}$ | $\pi_{err}$ | $\alpha_{ref}$ | $\alpha_{alt}$ | $\alpha_{err}$ | $\varphi$ | $p$      | ML-P     |
|--------------------|-------------|-------------|-------------|----------------|----------------|----------------|-----------|----------|----------|
| Multinomial        | 0.499       | 0.499       | 0.00229     | NA             | NA             | NA             | NA        | NA       | NA       |
| Multinomial w/bias | 0.539       | 0.459       | 0.00229     | NA             | NA             | NA             | NA        | NA       | NA       |
| CEU10 M1 TH        | 0.539       | 0.458       | 0.00234     | 154            | 131            | 0.667          | 0.00349   | 1        | 1        |
| CEU10 M1 PH        | 0.543       | 0.455       | 0.00262     | 59.2           | 49.6           | 0.286          | 0.00908   | 1        | 1        |
| CEU10 M2 TH        | 0.534       | 0.463       | 0.00305     | Inf            | Inf            | Inf            | 0         | 0.684    | 0.606    |
|                    | 0.55        | 0.449       | 0.000645    | 42.2           | 34.4           | 0.0495         | 0.0129    | 0.316    | 0.394    |
| CEU10 M2 PH        | 0.537       | 0.461       | 0.00245     | Inf            | Inf            | Inf            | 0         | 0.787    | 0.721    |
|                    | 0.563       | 0.434       | 0.00271     | 15.4           | 11.9           | 0.0741         | 0.0353    | 0.213    | 0.279    |
| CEU10 M3 TH        | 0.529       | 0.468       | 0.00237     | 459            | 407            | 2.05           | 0.00115   | 0.883    | 0.542    |
|                    | 0.618       | 0.381       | 0.00157     | Inf            | Inf            | Inf            | 0         | 0.116    | 0.358    |
|                    | 0.495       | 0.491       | 0.0147      | 5.7            | 5.65           | 0.169          | 0.0799    | 0.0014   | 0.1      |
| CEU10 M3 PH        | 0.532       | 0.466       | 0.00227     | 1.1e+03        | 964            | 4.69           | 0.000483  | 0.88     | 0.599    |
|                    | 0.66        | 0.338       | 0.00208     | 202            | 103            | 0.636          | 0.00326   | 0.0877   | 0.292    |
|                    | 0.508       | 0.482       | 0.00987     | 7.47           | 7.08           | 0.145          | 0.0637    | 0.032    | 0.109    |
| CEU10 M4 TH        | 0.538       | 0.458       | 0.00315     | 5.76e+03       | 4.91e+03       | 33.7           | 9.34e-05  | 0.704    | 0.175    |
|                    | 0.498       | 0.502       | 0.000158    | Inf            | Inf            | Inf            | 0         | 0.189    | 0.427    |
|                    | 0.621       | 0.379       | 0.000147    | Inf            | Inf            | Inf            | 0         | 0.105    | 0.345    |
|                    | 0.506       | 0.476       | 0.0173      | 6.74           | 6.34           | 0.231          | 0.0699    | 0.00181  | 0.0541   |
| CEU10 M4 PH        | 0.532       | 0.466       | 0.00228     | 1.31e+03       | 1.15e+03       | 5.62           | 0.000406  | 0.871    | 0.505    |
|                    | 0.647       | 0.35        | 0.00244     | 93.5           | 50.6           | 0.352          | 0.00687   | 0.112    | 0.29     |
|                    | 0.398       | 0.597       | 0.00454     | 19.6           | 29.5           | 0.224          | 0.0199    | 0.0158   | 0.173    |
|                    | 0.491       | 0.365       | 0.144       | 8.62           | 6.42           | 2.53           | 0.0538    | 0.00139  | 0.0316   |
| CEU10 M5 TH        | 0.538       | 0.46        | 0.0027      | 932            | 797            | 4.68           | 0.000577  | 0.838    | 0.235    |
|                    | 0.481       | 0.519       | 9.65e-09    | Inf            | Inf            | Inf            | 0         | 0.0888   | 0.377    |
|                    | 0.633       | 0.367       | 7.37e-06    | Inf            | Inf            | Inf            | 0         | 0.0724   | 0.296    |
|                    | 0.441       | 0.531       | 0.0285      | 4.25           | 5.12           | 0.275          | 0.094     | 0.000568 | 0.0386   |
|                    | 0.713       | 0.267       | 0.02        | Inf            | Inf            | Inf            | 0         | 0.000359 | 0.0536   |
| CEU10 M5 PH        | 0.533       | 0.465       | 0.00229     | 962            | 840            | 4.13           | 0.000554  | 0.888    | 0.514    |
|                    | 0.658       | 0.339       | 0.00225     | 133            | 68.7           | 0.455          | 0.00492   | 0.0954   | 0.268    |
|                    | 0.389       | 0.606       | 0.00444     | 20.9           | 32.6           | 0.239          | 0.0183    | 0.0142   | 0.165    |
|                    | 0.529       | 0.374       | 0.0966      | 13             | 9.2            | 2.38           | 0.0391    | 0.00186  | 0.0523   |
|                    | 0.313       | 0.281       | 0.406       | Inf            | Inf            | Inf            | 0         | 0.000123 | 0.000218 |
| CEU10 M6 TH        | 0.537       | 0.461       | 0.00266     | 957            | 821            | 4.75           | 0.000561  | 0.845    | 0.241    |
|                    | 0.63        | 0.37        | 0.000182    | Inf            | Inf            | Inf            | 0         | 0.0776   | 0.297    |
|                    | 0.476       | 0.524       | 2.1e-11     | 4.4e+18        | 4.84e+18       | 1.94e+08       | 1.08e-19  | 0.0645   | 0.154    |
|                    | 0.475       | 0.525       | 6.6e-11     | 4.46e+18       | 4.92e+18       | 6.19e+08       | 1.07e-19  | 0.0123   | 0.215    |
|                    | 0.441       | 0.529       | 0.03        | 4.22           | 5.07           | 0.287          | 0.0946    | 0.000547 | 0.0366   |
|                    | 0.712       | 0.268       | 0.0205      | Inf            | Inf            | Inf            | 0         | 0.000361 | 0.0559   |
| CEU10 M6 PH        | 0.539       | 0.459       | 0.00259     | 6.83e+03       | 5.81e+03       | 32.9           | 7.89e-05  | 0.769    | 0.27     |
|                    | 0.501       | 0.499       | 0.000612    | 289            | 288            | 0.353          | 0.00173   | 0.138    | 0.322    |
|                    | 0.667       | 0.331       | 0.00181     | 184            | 91.1           | 0.497          | 0.00362   | 0.0825   | 0.257    |
|                    | 0.35        | 0.644       | 0.0053      | 28             | 51.5           | 0.424          | 0.0123    | 0.00777  | 0.0896   |
|                    | 0.537       | 0.396       | 0.067       | 11.6           | 8.58           | 1.45           | 0.0441    | 0.00323  | 0.0613   |
|                    | 0.318       | 0.284       | 0.398       | Inf            | Inf            | Inf            | 0         | 0.000136 | 0.000246 |

| Parameter estimates CHM1 Chromosome 21 |             |             |                |                |           |          |          |
|----------------------------------------|-------------|-------------|----------------|----------------|-----------|----------|----------|
| Model                                  | $\pi_{ref}$ | $\pi_{err}$ | $\alpha_{ref}$ | $\alpha_{err}$ | $\varphi$ | $p$      | ML-P     |
| CHM1 Multinomial                       | 1           | 0.000255    | NA             | NA             | NA        | NA       | NA       |
| CHM1 M1 FD                             | 0.999       | 0.00129     | 5.18           | 0.00667        | 0.162     | 1        | 1        |
| CHM1 M1 RD                             | 1           | 0.000256    | 273            | 0.0697         | 0.00365   | 1        | 1        |
| CHM1 M2 FD                             | 1           | 0.000249    | 396            | 0.0987         | 0.00252   | 0.972    | 0.995    |
|                                        | 0.982       | 0.0176      | 0.119          | 0.00214        | 0.892     | 0.0278   | 0.00485  |
| CHM1 M2 RD                             | 1           | 0.00022     | Inf            | Inf            | 0         | 0.751    | 0.808    |
|                                        | 1           | 0.000361    | 64.5           | 0.0233         | 0.0153    | 0.249    | 0.192    |
| CHM1 M3 FD                             | 0.999       | 0.000615    | 0.1            | 6.16e-05       | 0.909     | 0.745    | 0.981    |
|                                        | 0.999       | 0.000804    | Inf            | Inf            | 0         | 0.253    | 0        |
|                                        | 0.981       | 0.0192      | Inf            | Inf            | 0         | 0.00224  | 0.0191   |
| CHM1 M3 RD                             | 1           | 0.000185    | Inf            | Inf            | 0         | 0.995    | 0.981    |
|                                        | 0.986       | 0.0141      | Inf            | Inf            | 0         | 0.00446  | 0.0187   |
|                                        | 0.926       | 0.0742      | Inf            | Inf            | 0         | 0.000101 | 0.000441 |
| CHM1 M4 FD                             | 1           | 0.000185    | 2.25e+04       | 4.16           | 4.44e-05  | 0.994    | 0.98     |
|                                        | 0.987       | 0.013       | 512            | 6.77           | 0.00192   | 0.00497  | 0.0191   |
|                                        | 0.00453     | 0.995       | 0.274          | 60.3           | 0.0162    | 0.000363 | 0.000363 |
|                                        | 0.766       | 0.234       | 6.39           | 1.96           | 0.107     | 0.000234 | 0.000259 |
| CHM1 M4 RD                             | 1           | 0.000185    | Inf            | Inf            | 0         | 0.995    | 0.981    |
|                                        | 0.986       | 0.0141      | Inf            | Inf            | 0         | 0.00446  | 0.0187   |
|                                        | 0.926       | 0.0742      | Inf            | Inf            | 0         | 0.000101 | 0.000441 |
|                                        | 1           | 0.000405    | 384            | 0.156          | 0.00259   | 1e-06    | 0        |
| CHM1 M5 FD                             | 1           | 0.000188    | 1.39e+04       | 2.62           | 7.17e-05  | 0.995    | 0.98     |
|                                        | 0.985       | 0.0146      | Inf            | Inf            | 0         | 0.00401  | 0.0191   |
|                                        | 0.984       | 0.0156      | 3.81           | 0.0604         | 0.205     | 0.000842 | 0        |
|                                        | 0.00453     | 0.995       | 0.274          | 60.3           | 0.0162    | 0.000363 | 0.000363 |
|                                        | 0.754       | 0.246       | 6.13           | 2              | 0.11      | 0.000181 | 0.000234 |
| CHM1 M5 RD                             | 1           | 0.000185    | Inf            | Inf            | 0         | 0.995    | 0.981    |
|                                        | 0.986       | 0.0141      | Inf            | Inf            | 0         | 0.00446  | 0.0187   |
|                                        | 1           | 0.000411    | 1.31e+03       | 0.54           | 0.000761  | 0.00013  | 0        |
|                                        | 0.926       | 0.0742      | Inf            | Inf            | 0         | 0.000101 | 0.000441 |
|                                        | 0.999       | 0.000912    | 447            | 0.408          | 0.00223   | 4.17e-09 | 0        |
| CHM1 M6 FD                             | 1           | 0.000188    | 1.3e+04        | 2.45           | 7.68e-05  | 0.995    | 0.98     |
|                                        | 0.985       | 0.0146      | Inf            | Inf            | 0         | 0.0032   | 0.0161   |
|                                        | 0.985       | 0.0148      | Inf            | Inf            | 0         | 0.0008   | 0.00285  |
|                                        | 0.00453     | 0.995       | 0.274          | 60.3           | 0.0162    | 0.000363 | 0.000363 |
|                                        | 0.832       | 0.168       | 3.91           | 0.791          | 0.176     | 0.000337 | 0.000389 |
|                                        | 0.999       | 0.000754    | 172            | 0.13           | 0.00576   | 0.000117 | 0        |
| CHM1 M6 RD                             | 1           | 0.000185    | Inf            | Inf            | 0         | 0.995    | 0        |
|                                        | 0.986       | 0.0141      | Inf            | Inf            | 0         | 0.00444  | 0.0163   |
|                                        | 1           | 2.58e-05    | Inf            | Inf            | 0         | 0.000851 | 0.981    |
|                                        | 0.926       | 0.0742      | Inf            | Inf            | 0         | 0.000101 | 0.000389 |
|                                        | 0.985       | 0.0154      | Inf            | Inf            | 0         | 1.73e-05 | 0.00252  |
|                                        | 1           | 0.000423    | Inf            | Inf            | 0         | 8.07e-06 | 0        |

| Parameter estimates CHM1 Chromosome 10 |             |             |                |                |           |          |          |
|----------------------------------------|-------------|-------------|----------------|----------------|-----------|----------|----------|
| Model                                  | $\pi_{ref}$ | $\pi_{err}$ | $\alpha_{ref}$ | $\alpha_{err}$ | $\varphi$ | $p$      | ML-P     |
| CHM1 Multinomial                       | 1           | 0.000286    | NA             | NA             | NA        | NA       | NA       |
| CHM1 M1 FD                             | 0.999       | 0.00122     | 6.23           | 0.00761        | 0.138     | 1        | 1        |
| CHM1 M1 RD                             | 1           | 0.000289    | 190            | 0.0551         | 0.00522   | 1        | 1        |
| CHM1 M2 FD                             | 1           | 0.000282    | 240            | 0.0676         | 0.00415   | 0.984    | 0.999    |
|                                        | 0.975       | 0.0254      | 0.0534         | 0.00139        | 0.948     | 0.0164   | 0.000978 |
| CHM1 M2 RD                             | 1           | 0.00026     | 370            | 0.0961         | 0.00269   | 0.942    | 0.997    |
|                                        | 0.999       | 0.000833    | 20             | 0.0167         | 0.0475    | 0.0585   | 0.00324  |
| CHM1 M3 FD                             | 1           | 0.000253    | 372            | 0.094          | 0.00268   | 0.964    | 0.979    |
|                                        | 0.999       | 0.00134     | 21.3           | 0.0287         | 0.0447    | 0.0359   | 0.0205   |
|                                        | 0.0836      | 0.916       | 0.0129         | 0.141          | 0.867     | 0.000379 | 0.000502 |
| CHM1 M3 RD                             | 1           | 0.000246    | 415            | 0.102          | 0.0024    | 0.998    | 0.979    |
|                                        | 0.976       | 0.0244      | 395            | 9.87           | 0.00246   | 0.00147  | 0.0206   |
|                                        | 0.859       | 0.141       | Inf            | Inf            | 0         | 9.34e-05 | 0.000201 |
| CHM1 M4 FD                             | 1           | 0.000464    | 0.0115         | 5.35e-06       | 0.989     | 0.745    | 0.979    |
|                                        | 0.999       | 0.000964    | 656            | 0.633          | 0.00152   | 0.253    | 0        |
|                                        | 0.974       | 0.0259      | 1.93e+03       | 51.4           | 0.000504  | 0.00139  | 0.0206   |
|                                        | 0.862       | 0.138       | Inf            | Inf            | 0         | 9.5e-05  | 0.000201 |
| CHM1 M4 RD                             | 1           | 0.000228    | 465            | 0.106          | 0.00215   | 0.92     | 0.979    |
|                                        | 0.999       | 0.000623    | 127            | 0.0794         | 0.00779   | 0.079    | 0        |
|                                        | 0.968       | 0.0318      | Inf            | Inf            | 0         | 0.000684 | 0.0206   |
|                                        | 0.859       | 0.141       | Inf            | Inf            | 0         | 9.35e-05 | 0.000176 |
| CHM1 M5 FD                             | 1           | 0.000265    | 382            | 0.101          | 0.00261   | 0.95     | 0.00364  |
|                                        | 0.993       | 0.00714     | 0.0115         | 8.29e-05       | 0.989     | 0.0485   | 0.976    |
|                                        | 0.97        | 0.0301      | Inf            | Inf            | 0         | 0.000943 | 0.0075   |
|                                        | 0.86        | 0.14        | Inf            | Inf            | 0         | 9.01e-05 | 0.000176 |
|                                        | 0.996       | 0.00395     | 569            | 2.26           | 0.00175   | 4.06e-07 | 0.0131   |
| CHM1 M5 RD                             | 1           | 0.000249    | 357            | 0.0889         | 0.00279   | 0.98     | 0.979    |
|                                        | 1           | 0.000487    | Inf            | Inf            | 0         | 0.0187   | 0        |
|                                        | 0.969       | 0.0306      | Inf            | Inf            | 0         | 0.000904 | 0.00316  |
|                                        | 0.86        | 0.14        | Inf            | Inf            | 0         | 9.42e-05 | 0.000176 |
|                                        | 0.987       | 0.0129      | 205            | 2.69           | 0.00478   | 4.12e-06 | 0.0174   |
| CHM1 M6 FD                             | 1           | 0.000194    | 74.2           | 0.0144         | 0.0133    | 0.502    | 0.979    |
|                                        | 1           | 0.000368    | 713            | 0.263          | 0.0014    | 0.498    | 0        |
|                                        | 0.113       | 0.887       | 0.0122         | 0.0955         | 0.903     | 0.000389 | 0.000351 |
|                                        | 0.995       | 0.00506     | 778            | 3.96           | 0.00128   | 0.000159 | 0.0203   |
|                                        | 0.86        | 0.14        | Inf            | Inf            | 0         | 8.85e-05 | 0.000426 |
|                                        | 0.53        | 0.47        | 0.0149         | 0.0132         | 0.973     | 2.64e-06 | 0        |
| CHM1 M6 RD                             | 1           | 0.00025     | 389            | 0.0972         | 0.00256   | 0.998    | 0.979    |
|                                        | 0.996       | 0.00379     | 94.1           | 0.358          | 0.0105    | 0.000895 | 0.00113  |
|                                        | 0.969       | 0.0307      | 2.57e+04       | 814            | 3.77e-05  | 0.000729 | 0.000953 |
|                                        | 0.972       | 0.0276      | 2.17e+03       | 61.4           | 0.000449  | 0.000204 | 0.0185   |
|                                        | 0.855       | 0.145       | Inf            | Inf            | 0         | 9.05e-05 | 0.000176 |
|                                        | 1           | 0.000316    | 2.05e+03       | 0.646          | 0.000489  | 4.29e-05 | 0        |

## Figures

### CEU 2013 Chromosome 21

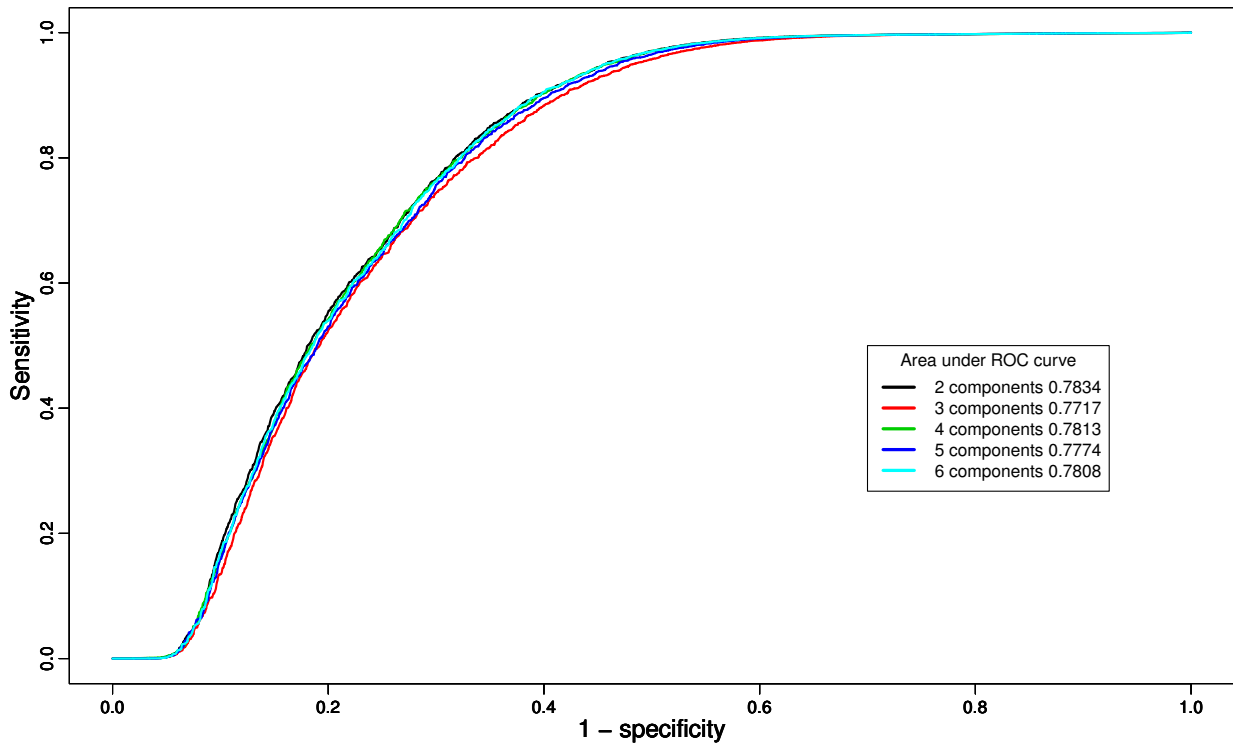

### CEU 2013 Chromosome 10

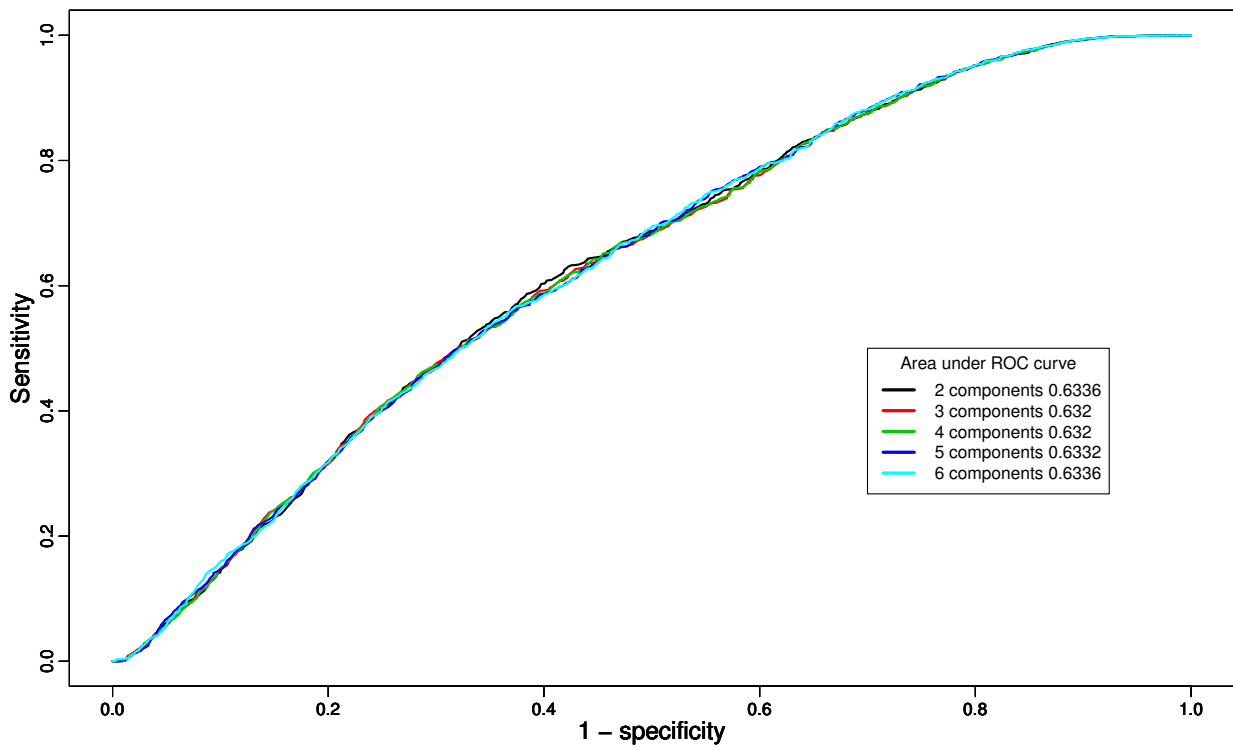



### CEU 2012 Chromosome 21

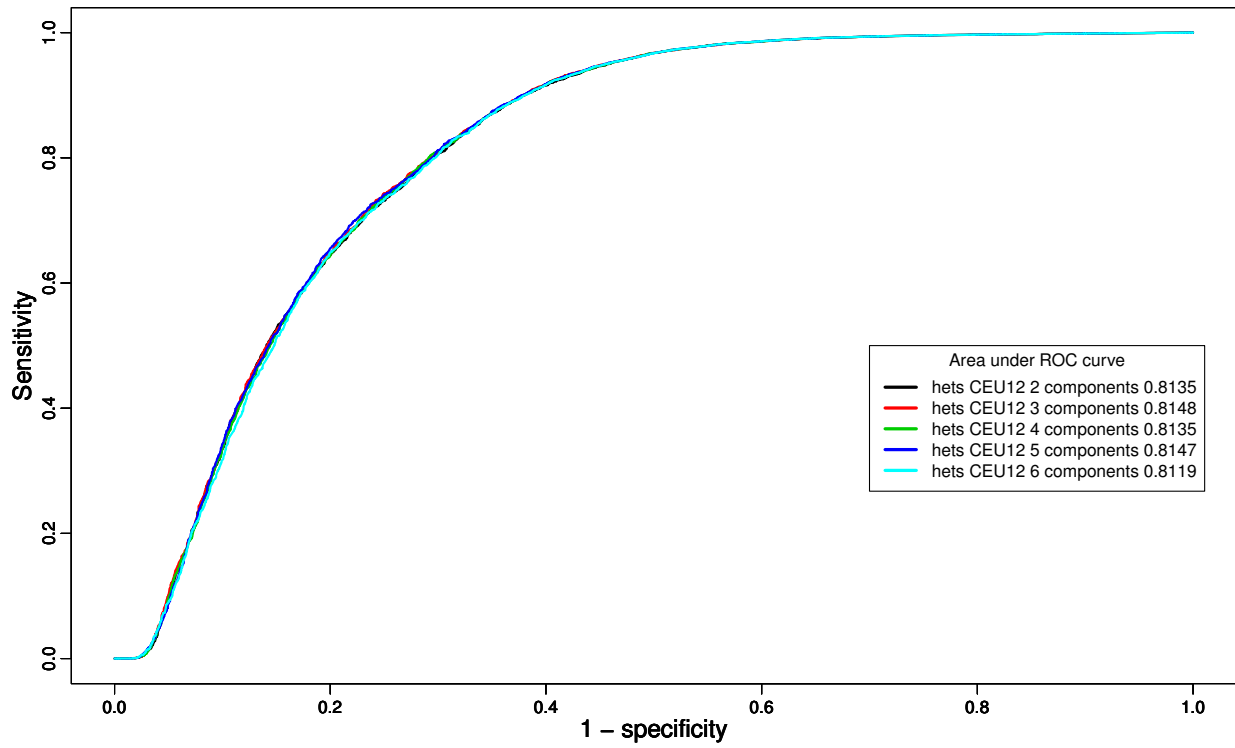

### CEU 2012 Chromosome 10

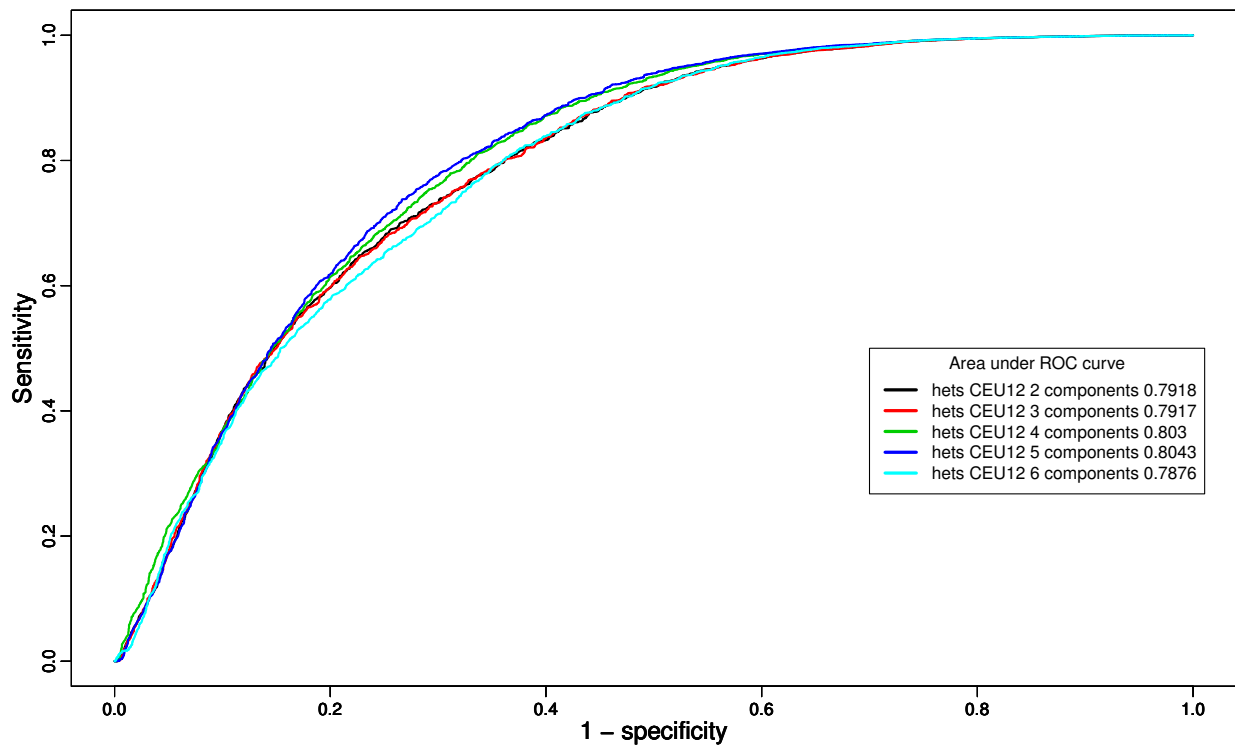

### CEU 2011 Chromosome 21

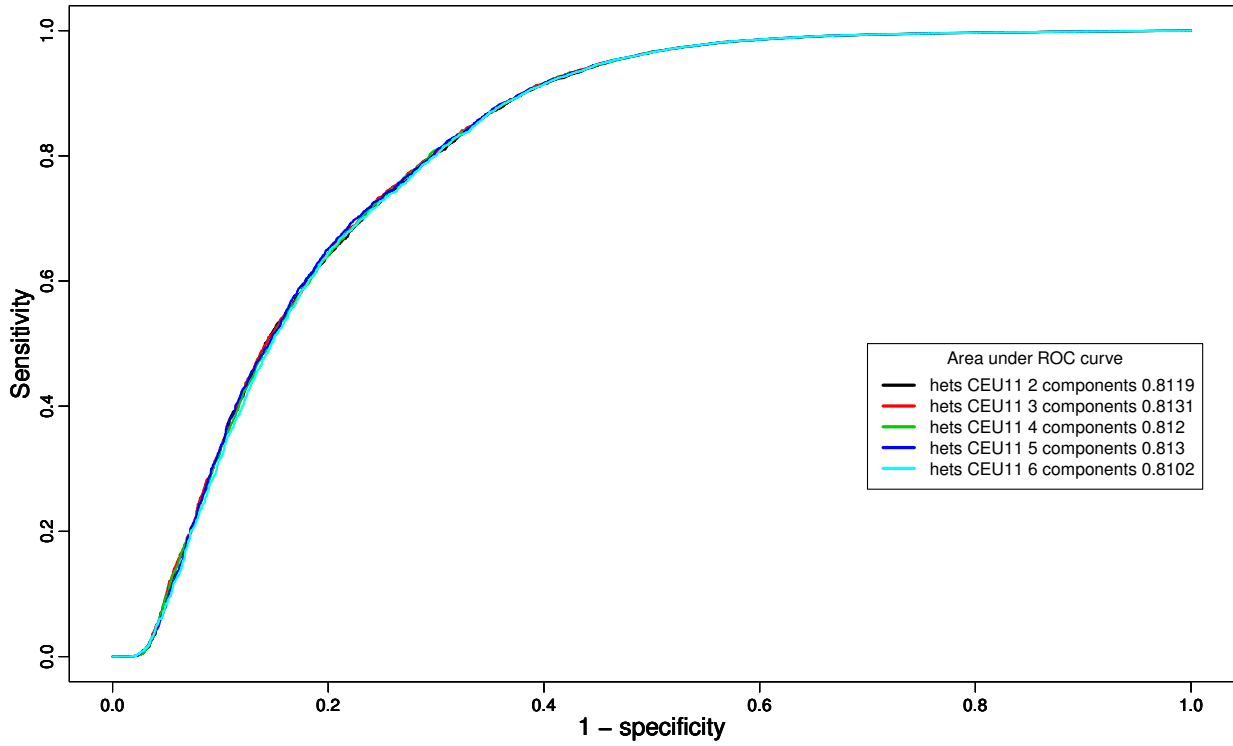

### CEU 2011 Chromosome 10

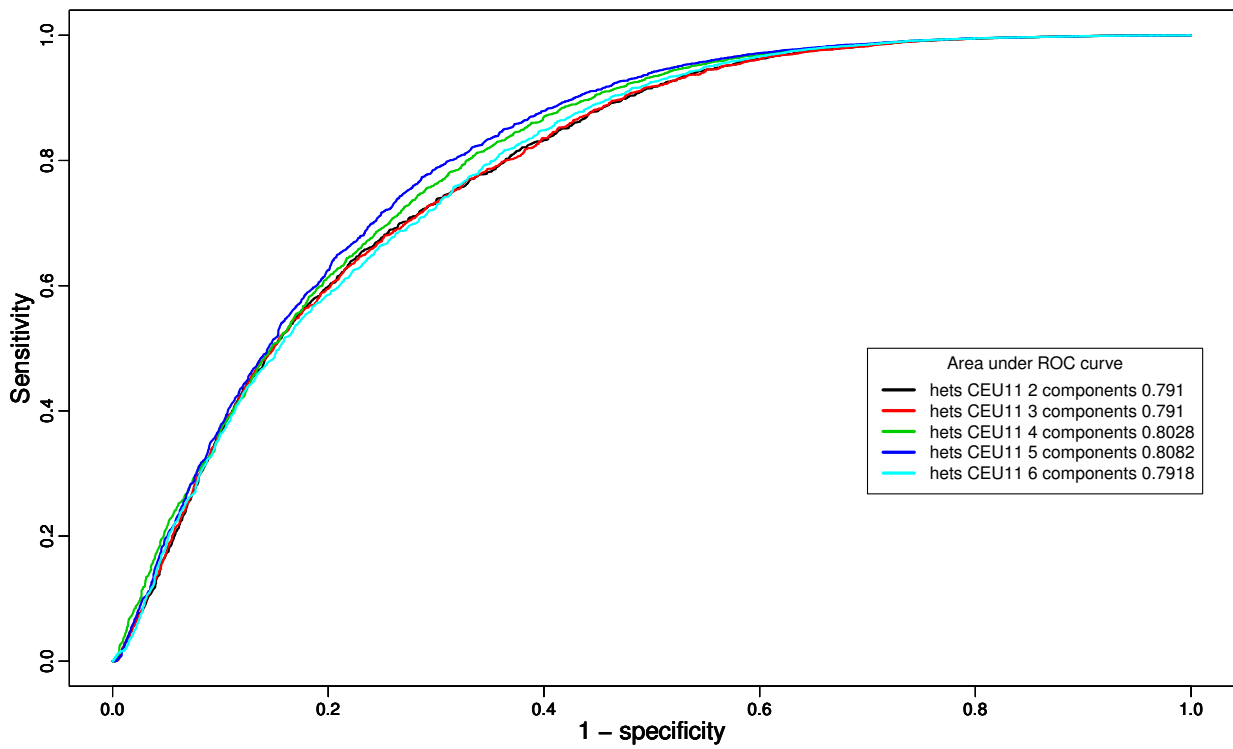

### CEU 2010 Chromosome 21

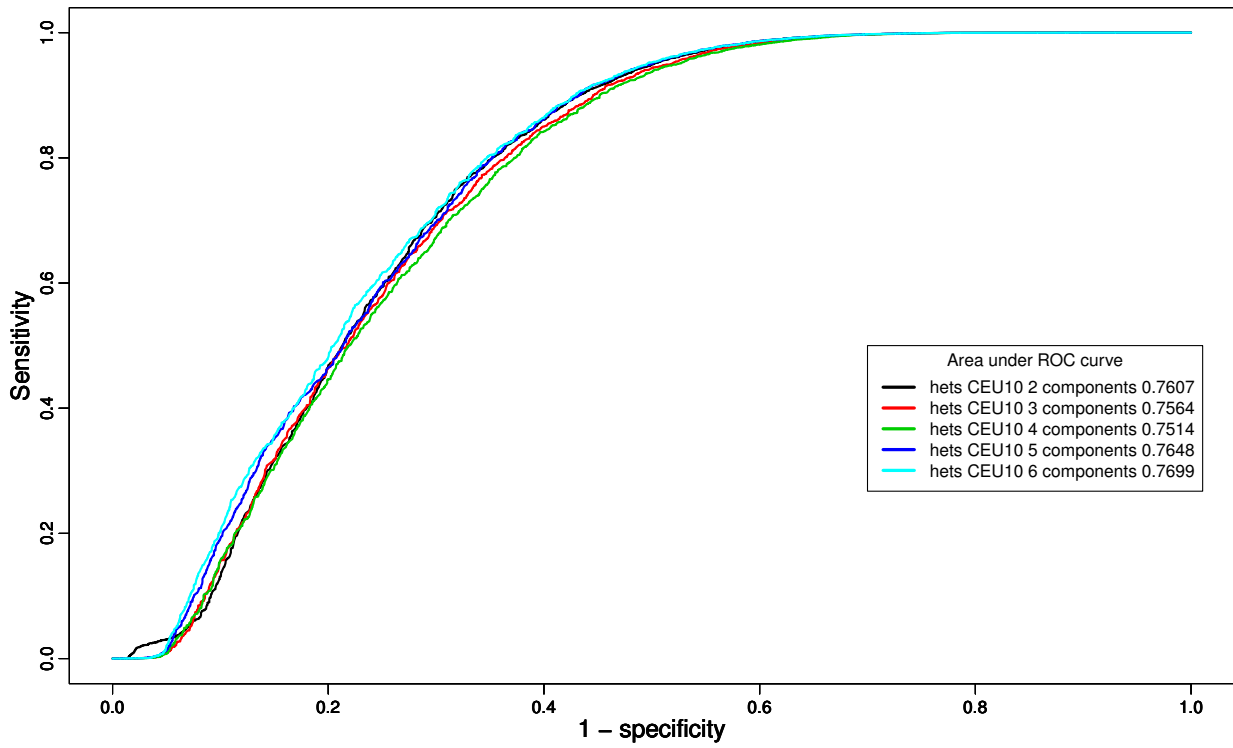

### CEU 2010 Chromosome 10

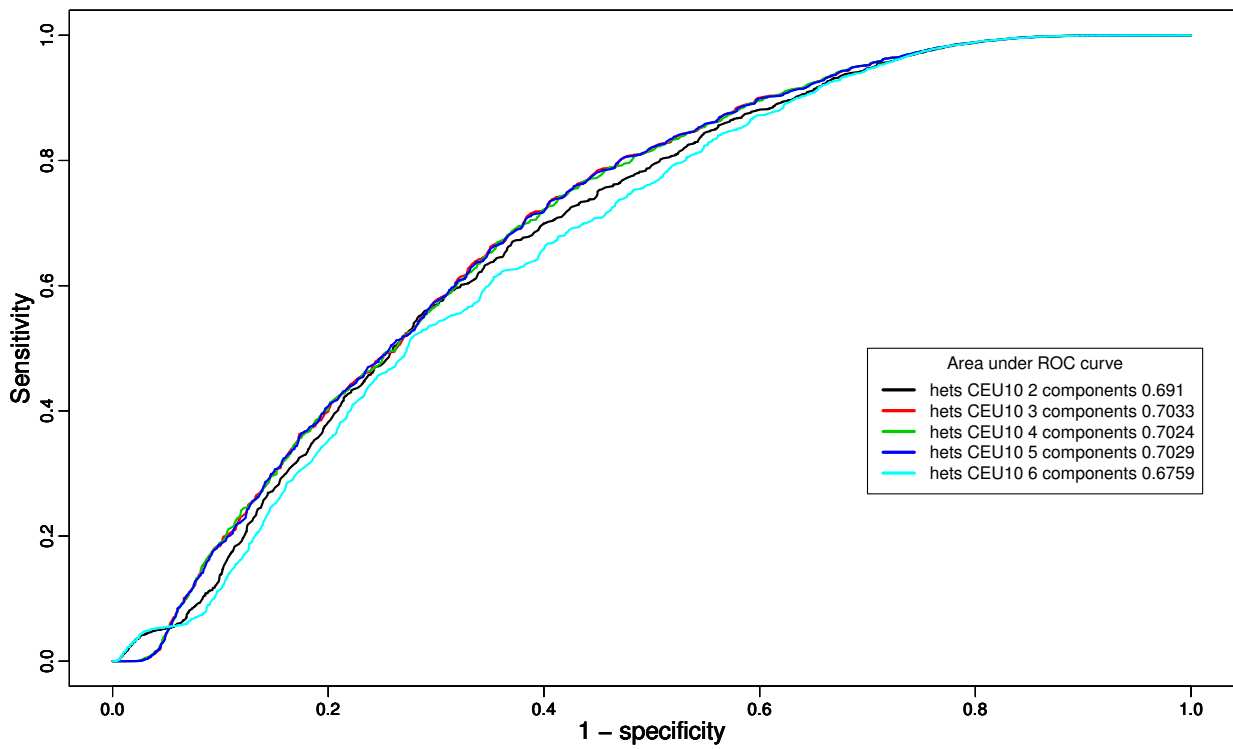

### Multinomial CHM1 Chr21

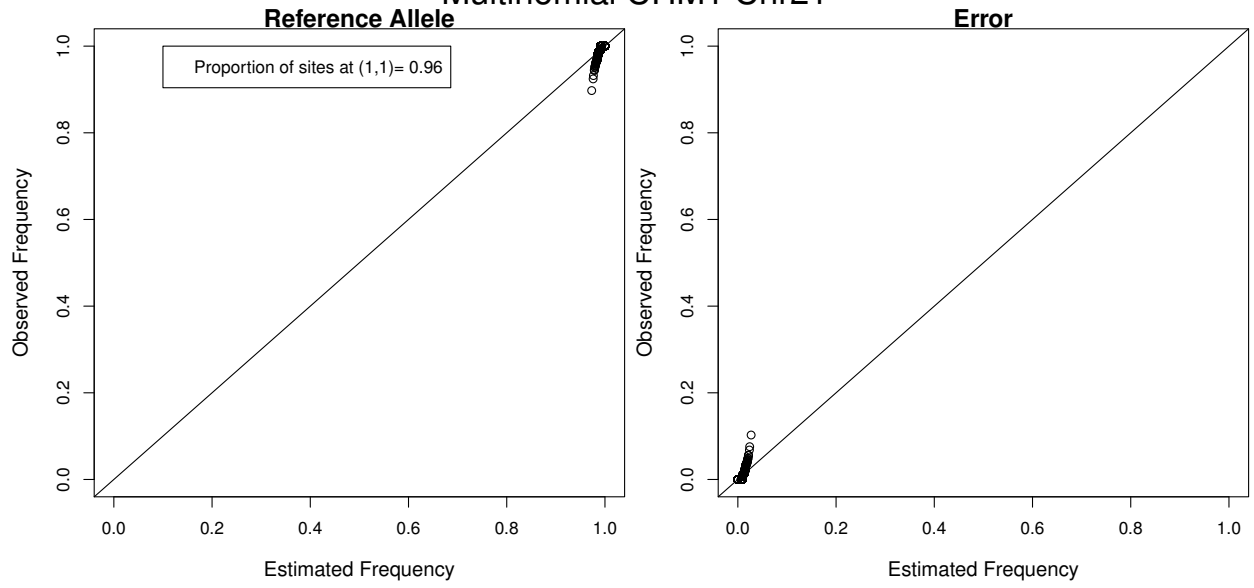

### Dirichlet Multinomial CHM1 Chr21

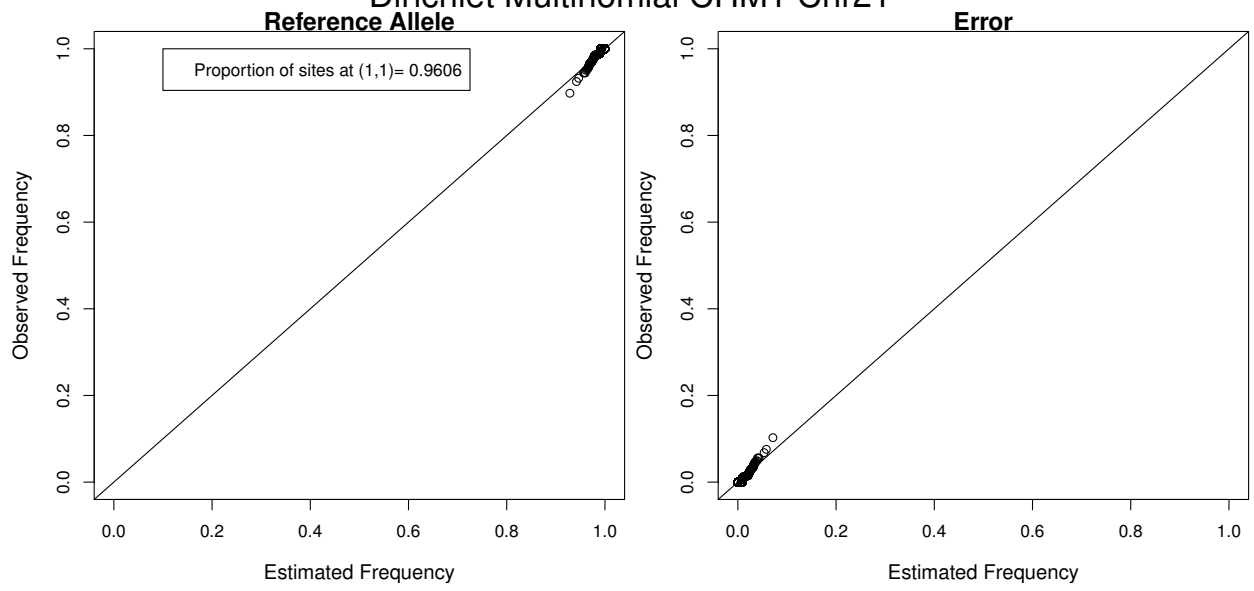

Mixture of Dirichlet Multinomial CHM1 Chr21 2 components

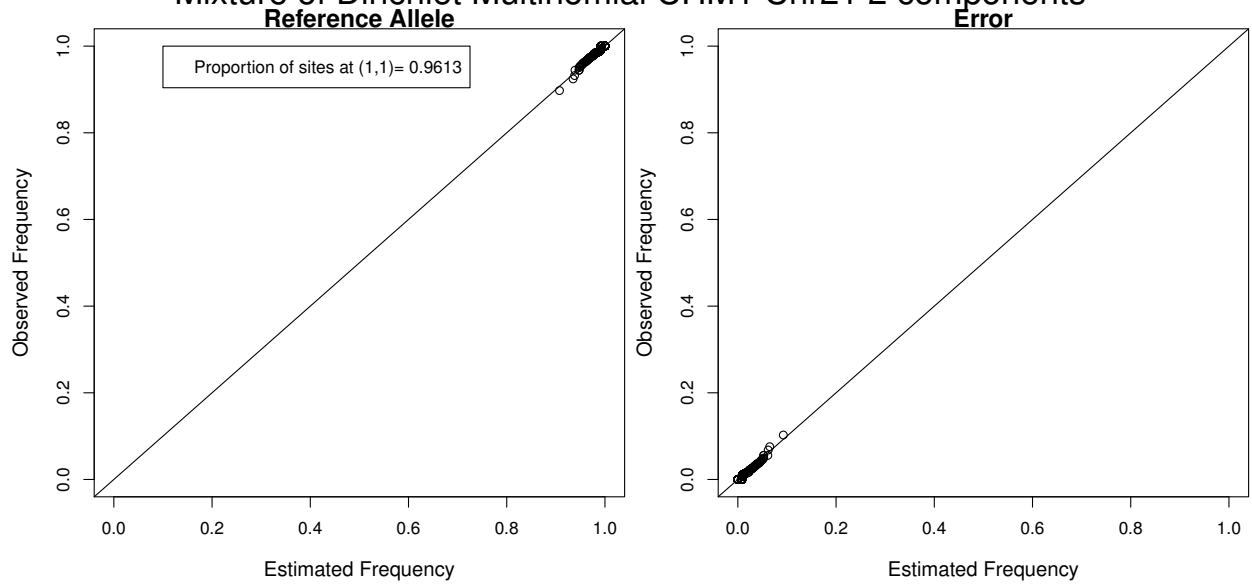

Mixture of Dirichlet Multinomial CHM1 Chr21 3 components

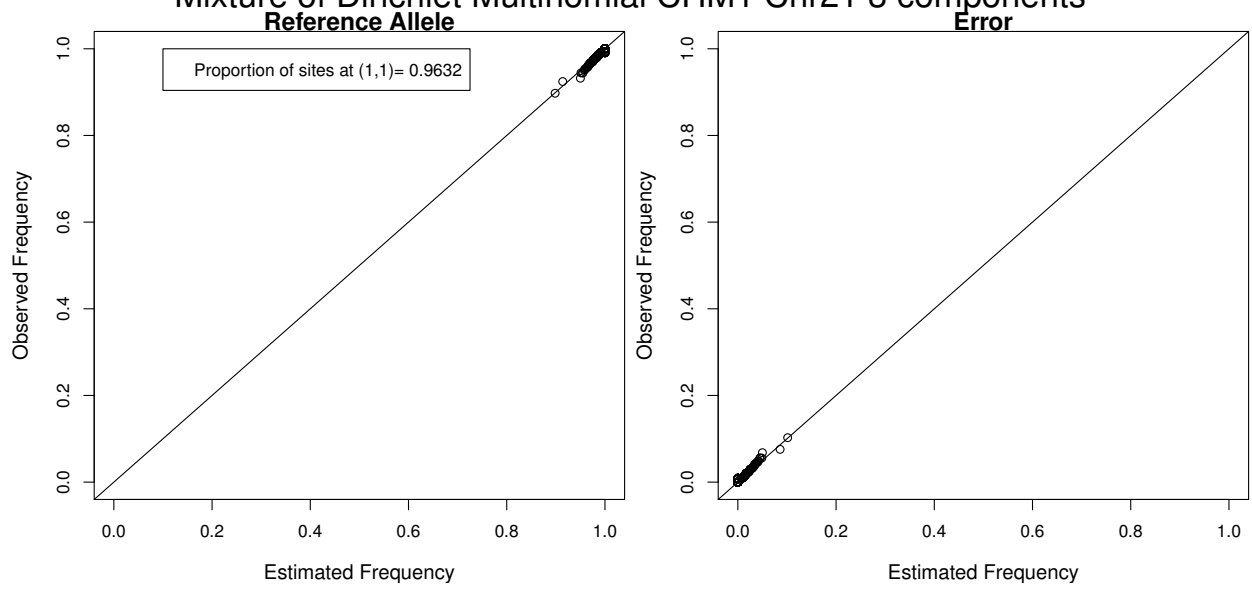

### Mixture of Dirichlet Multinomial CHM1 Chr21 4 components

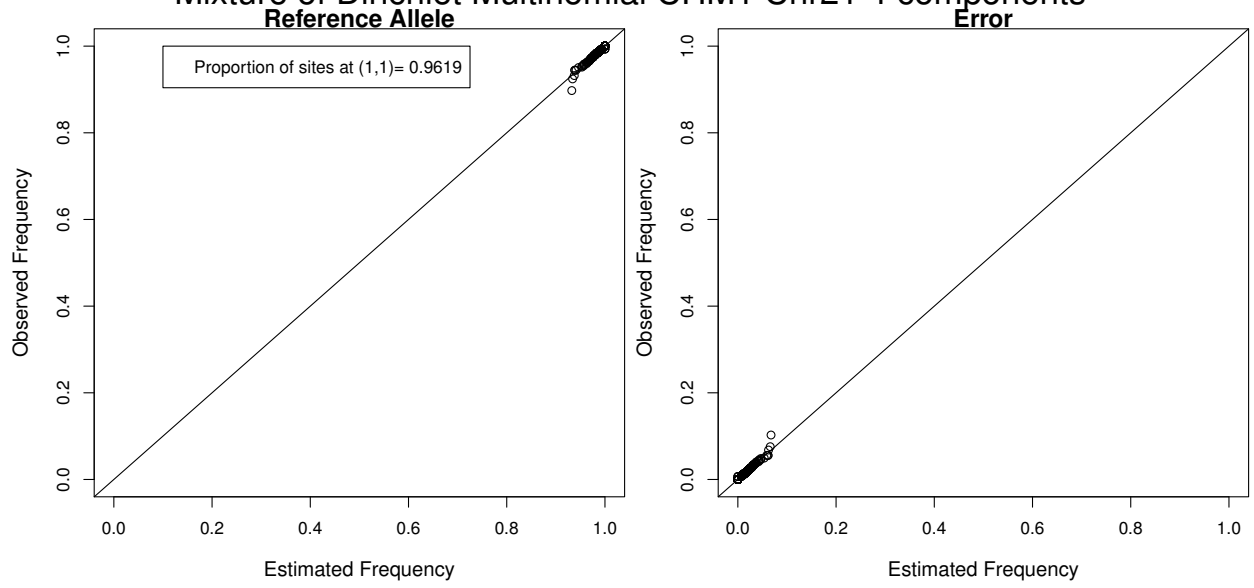

### Mixture of Dirichlet Multinomial CHM1 Chr21 5 components

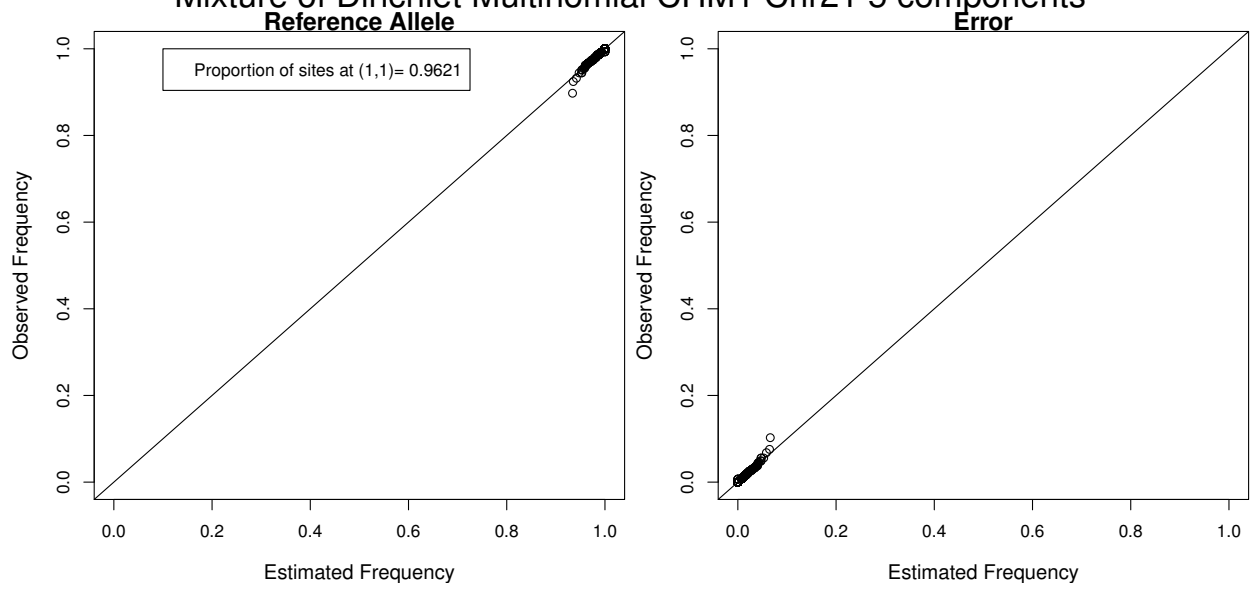

# Mixture of Dirichlet Multinomial CHM1 Chr21 6 components

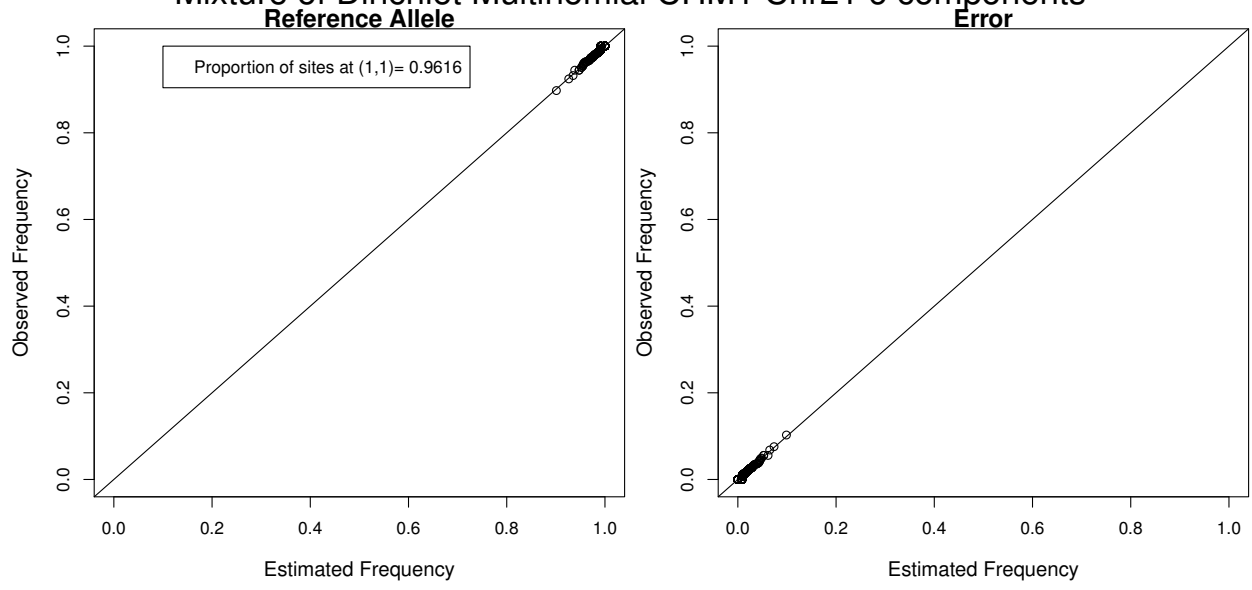

### Multinomial CHM1 Chr10

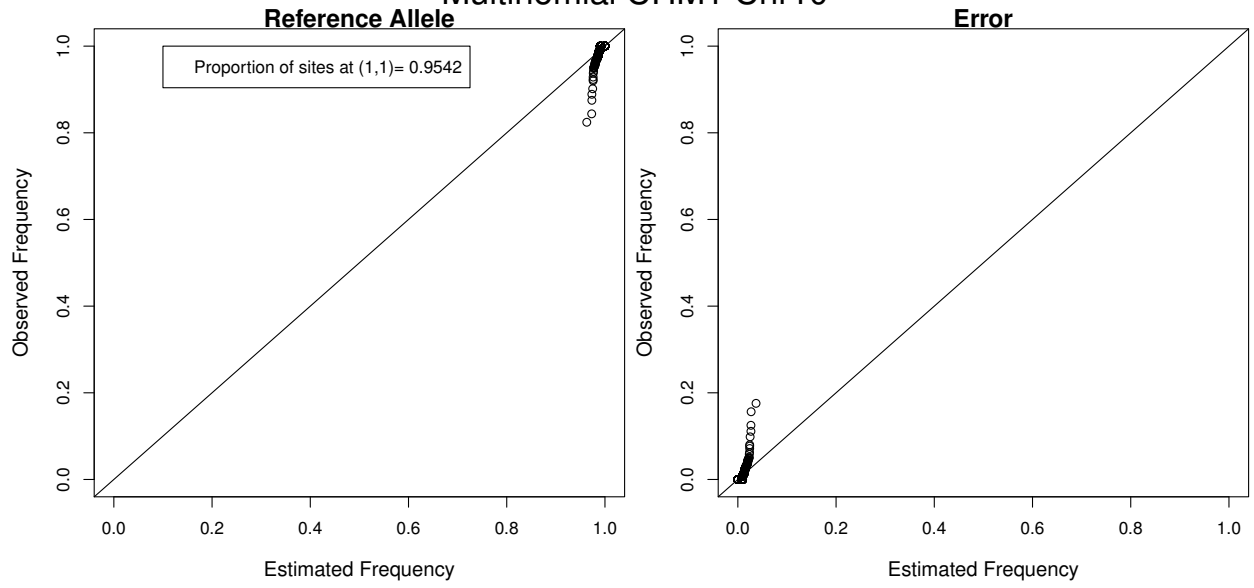

### Dirichlet Multinomial CHM1 Chr10

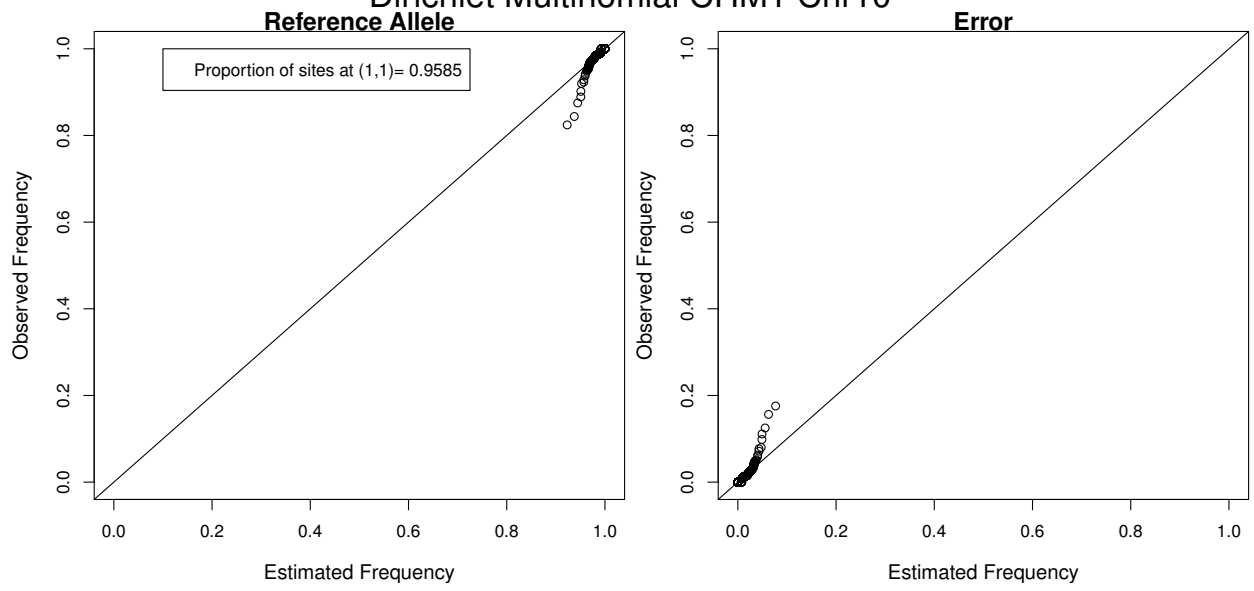



### Mixture of Dirichlet Multinomial CHM1 Chr10 2 components

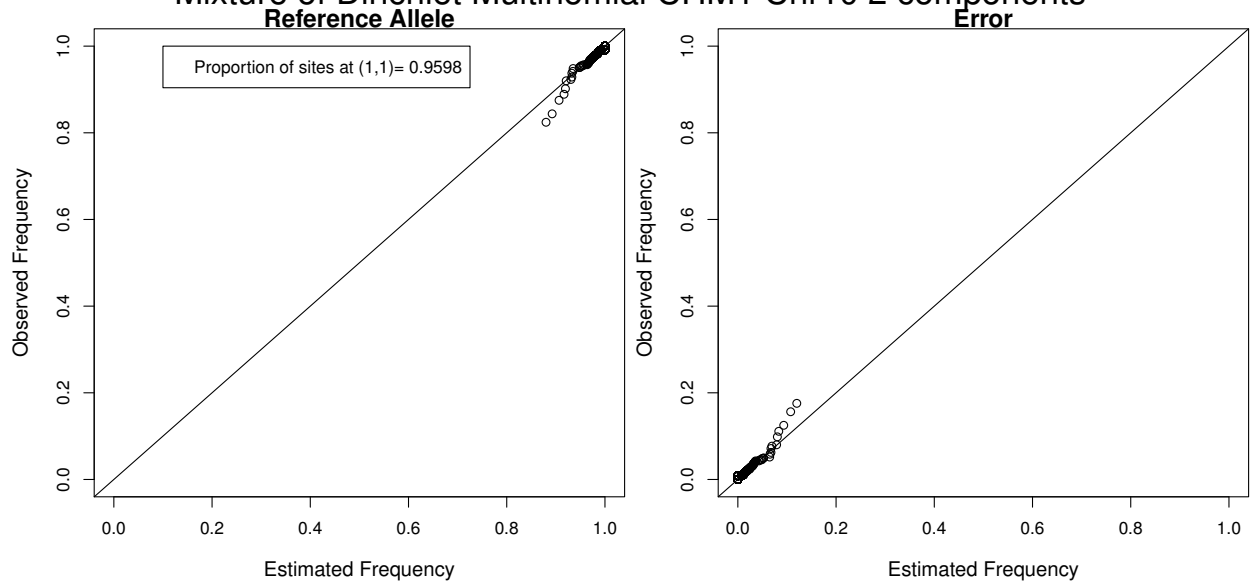

### Mixture of Dirichlet Multinomial CHM1 Chr10 3 components

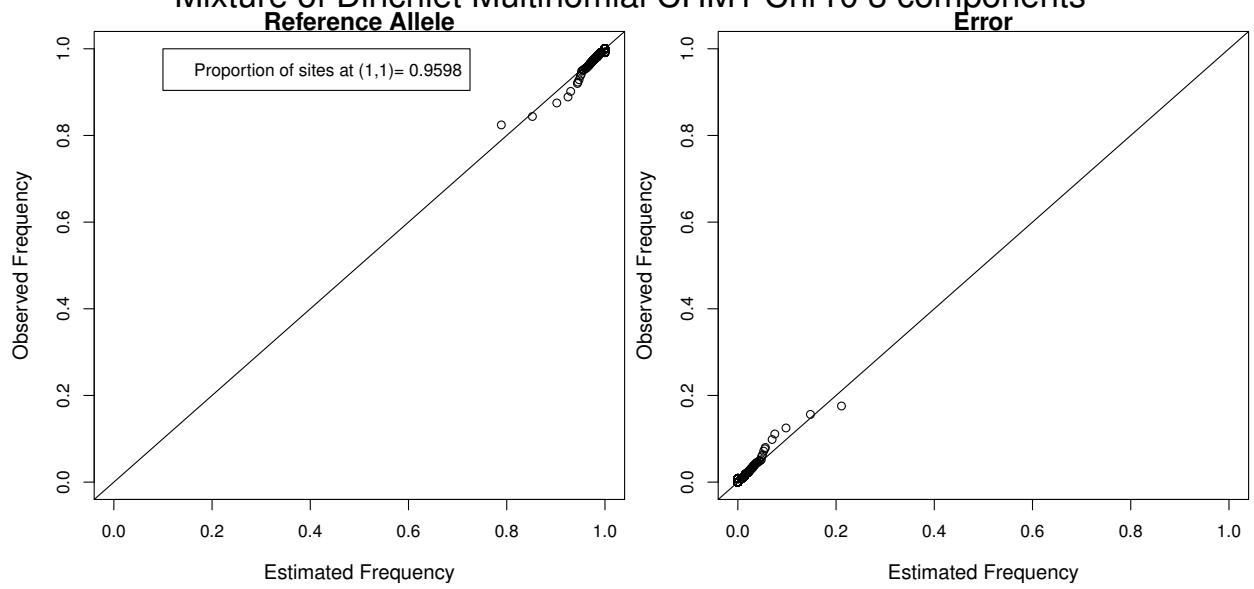

### Mixture of Dirichlet Multinomial CHM1 Chr10 4 components

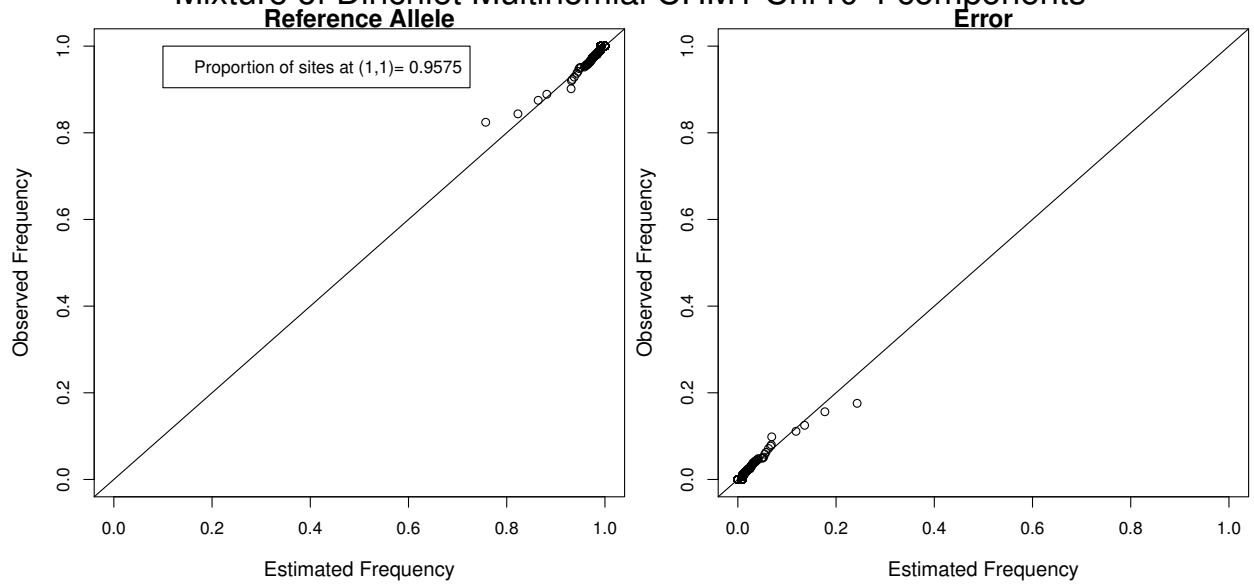

### Mixture of Dirichlet Multinomial CHM1 Chr10 5 components

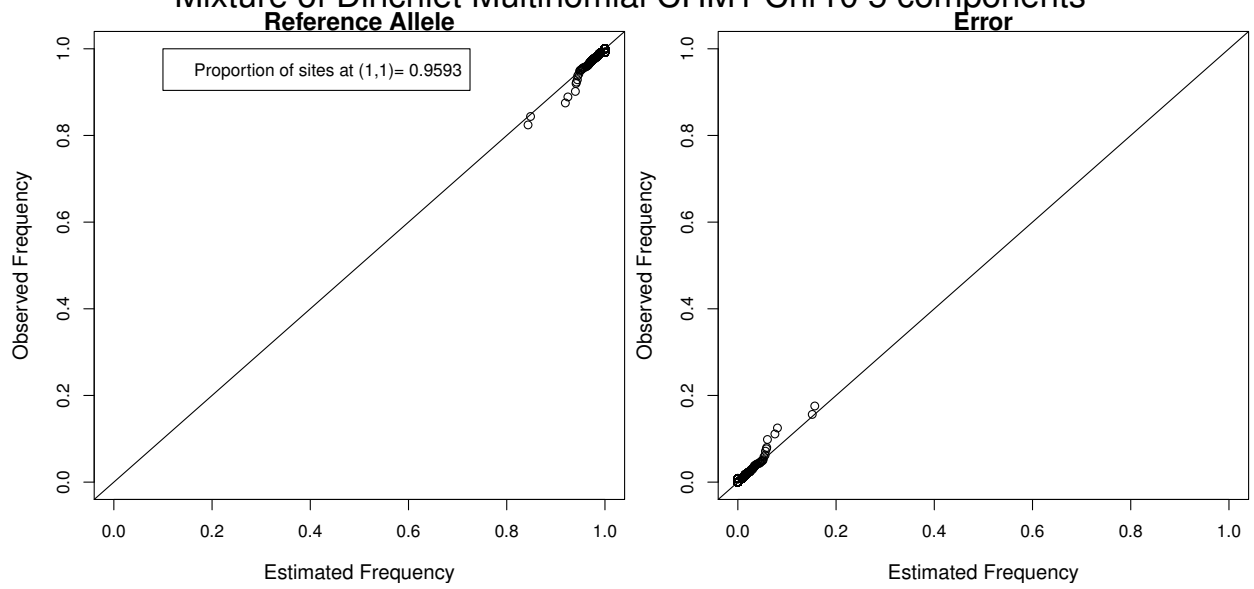

# Mixture of Dirichlet Multinomial CHM1 Chr10 6 components

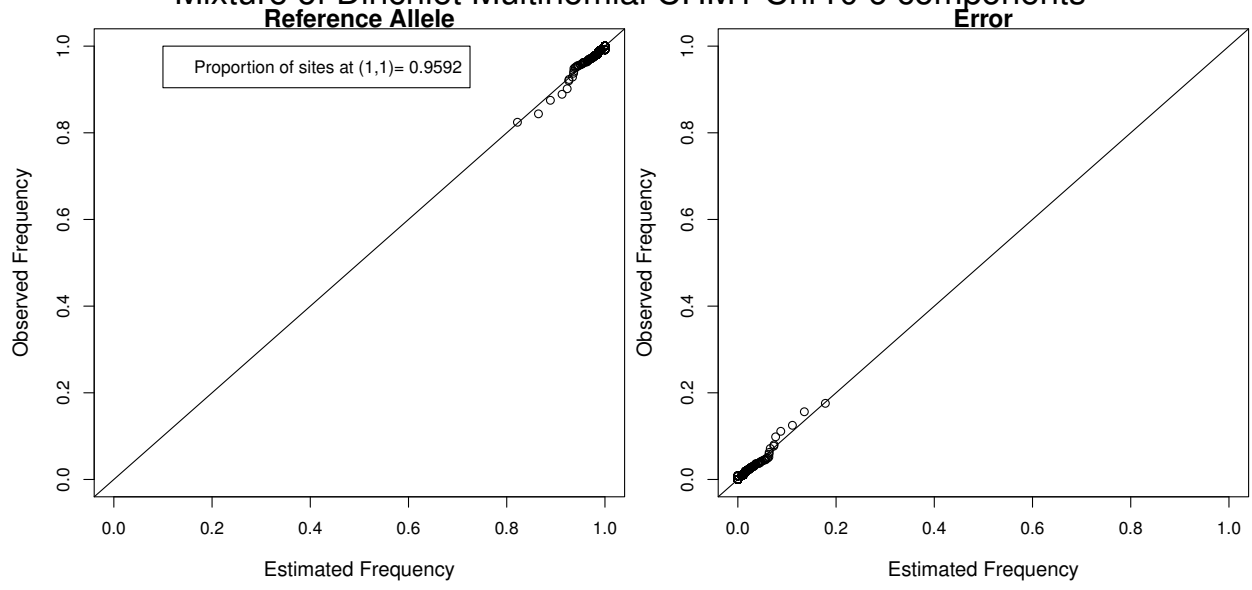

### Multinomial CEU13 Chr21

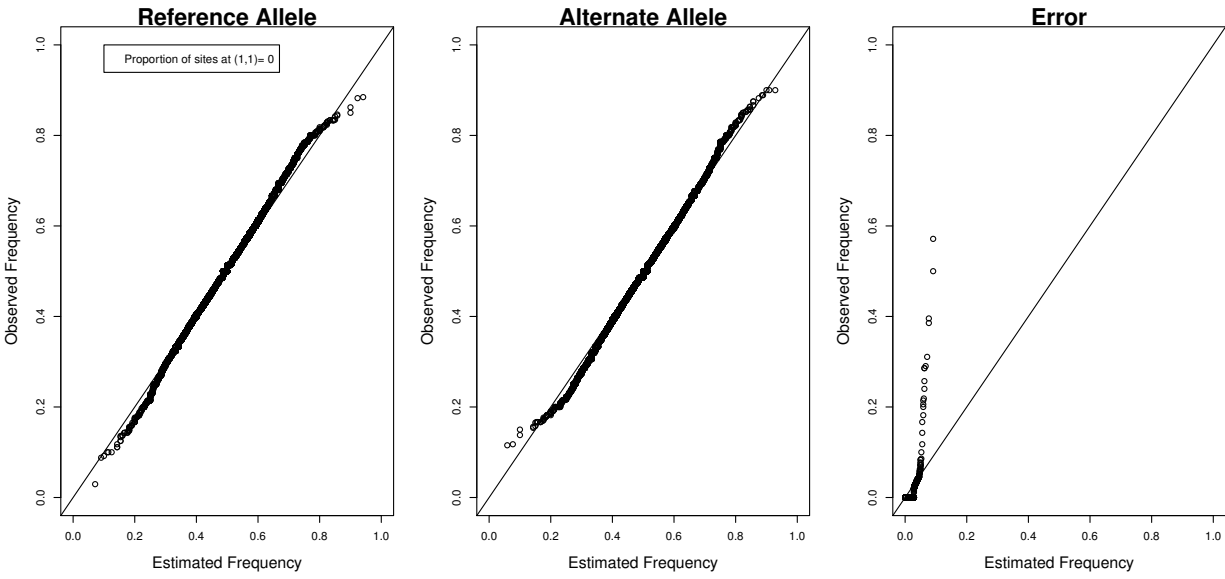

### Biased Multinomial CEU13 Chr21

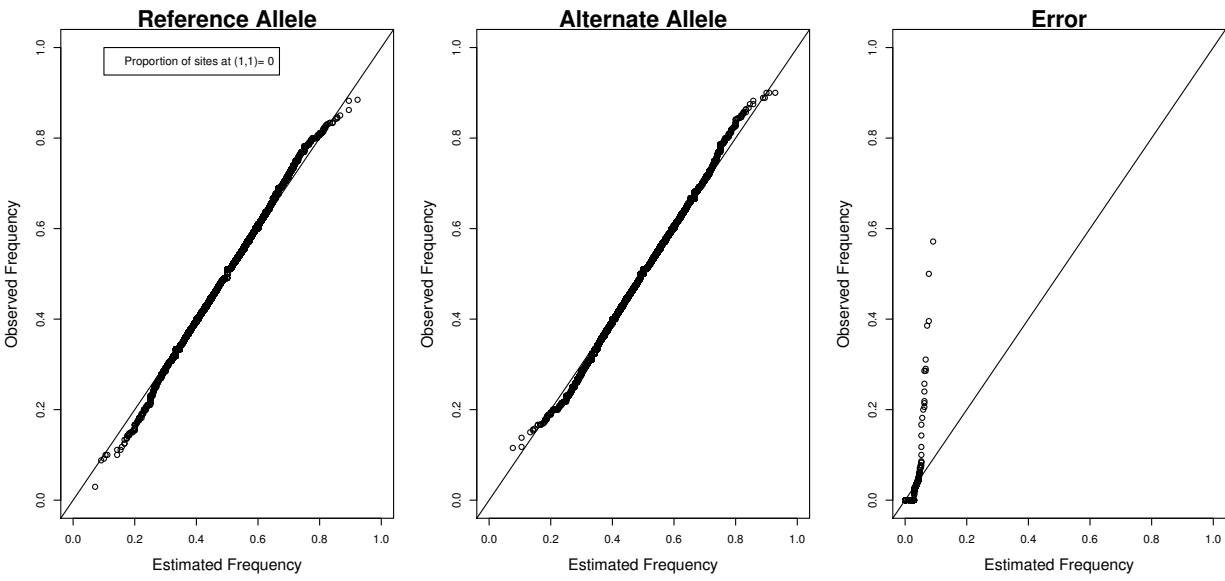

### Dirichlet Multinomial CEU13 Chr21

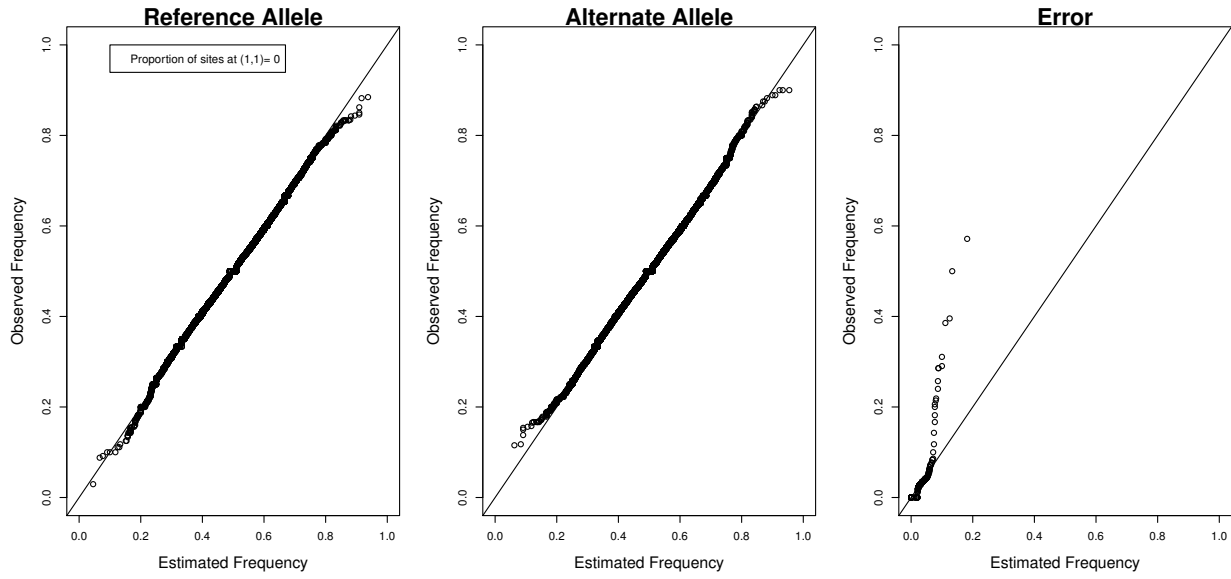

### Mixture of Dirichlet Multinomial CEU13 Chr21 2 components

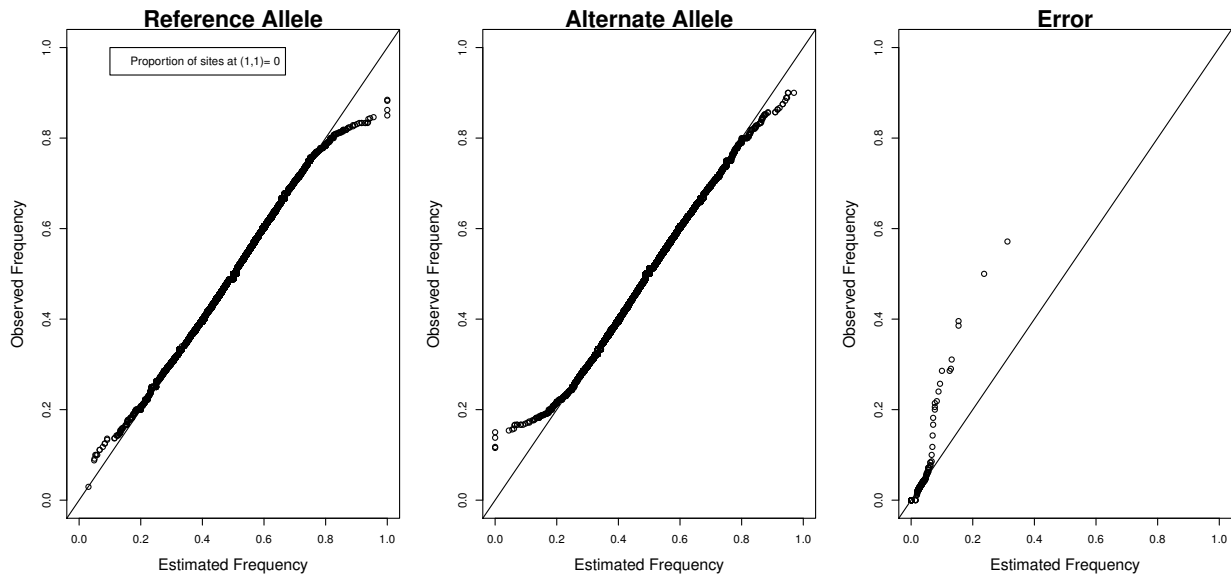

### Mixture of Dirichlet Multinomial CEU13 Chr21 3 components

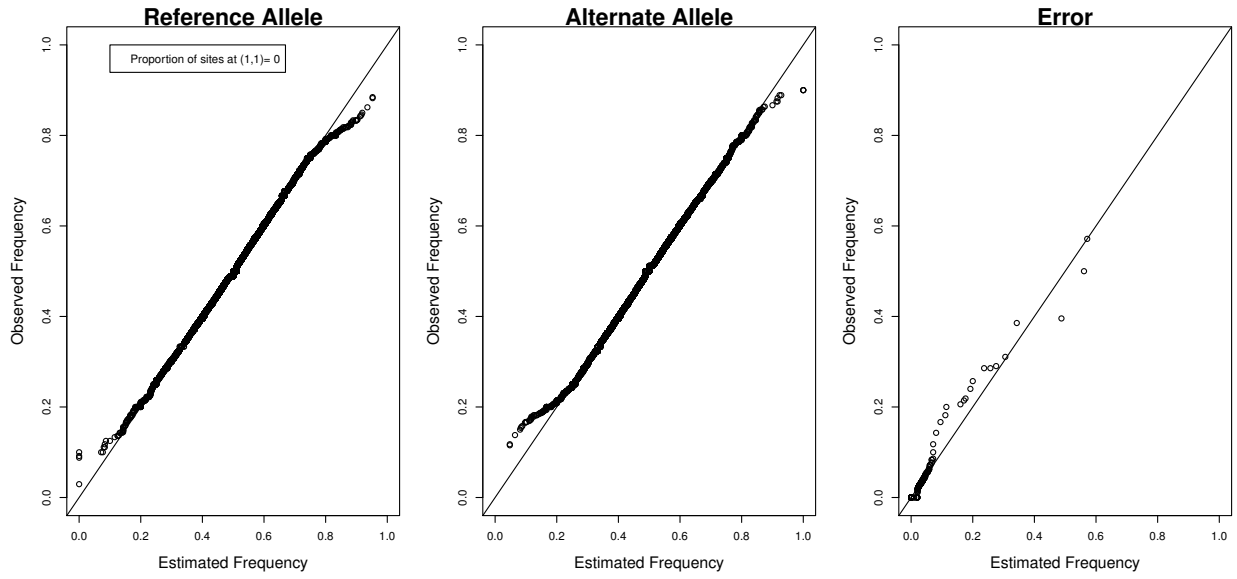

### Mixture of Dirichlet Multinomial CEU13 Chr21 4 components

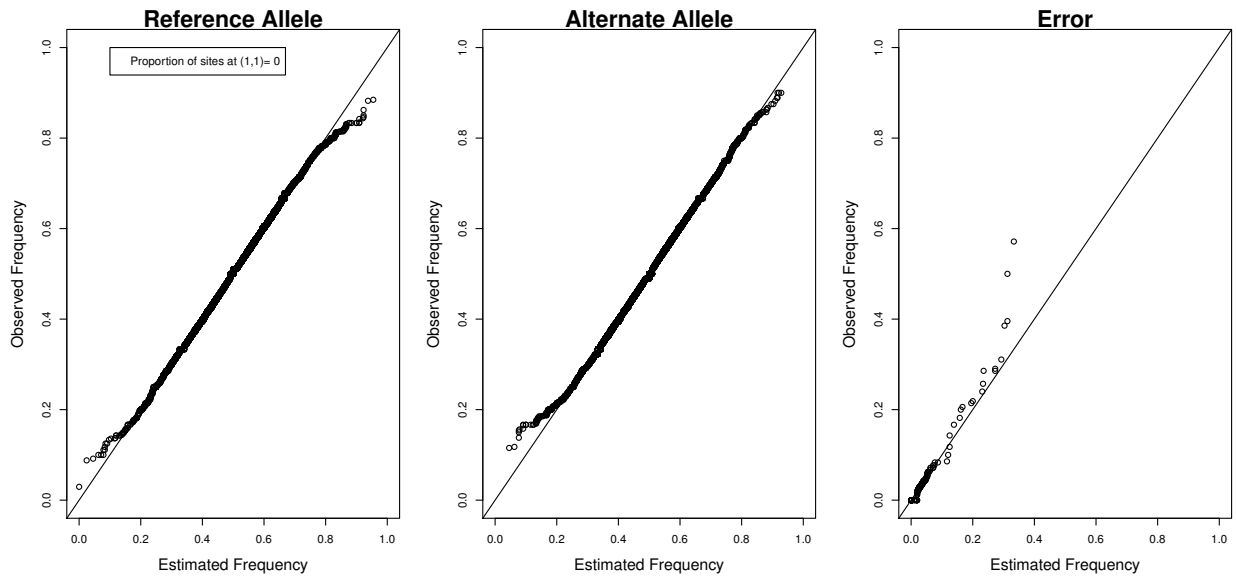

### Mixture of Dirichlet Multinomial CEU13 Chr21 5 components

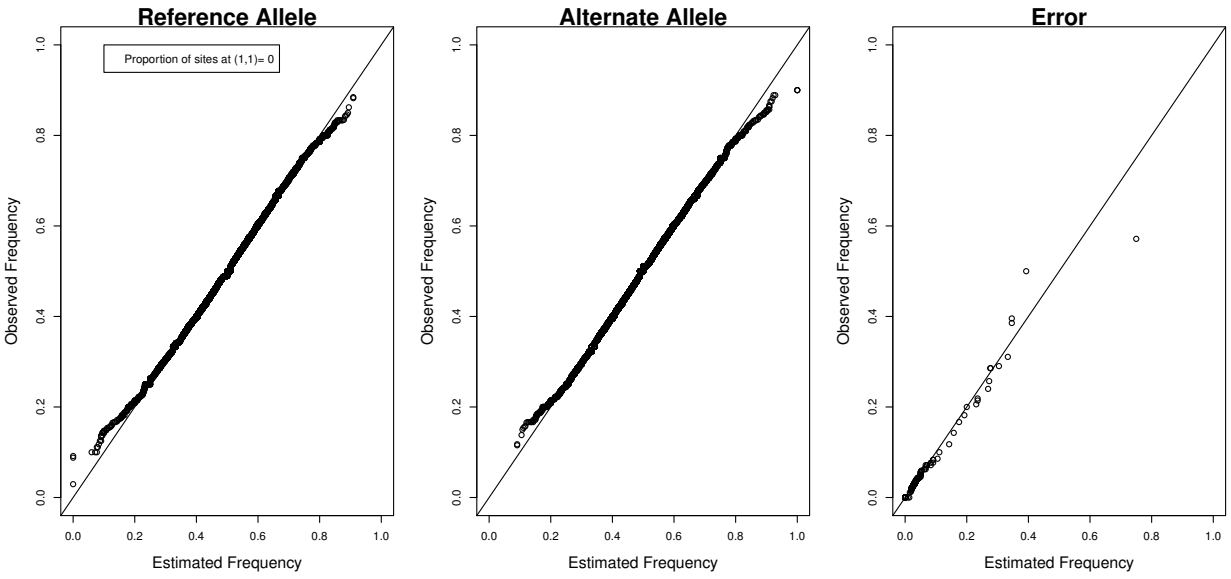

### Mixture of Dirichlet Multinomial CEU13 Chr21 6 components

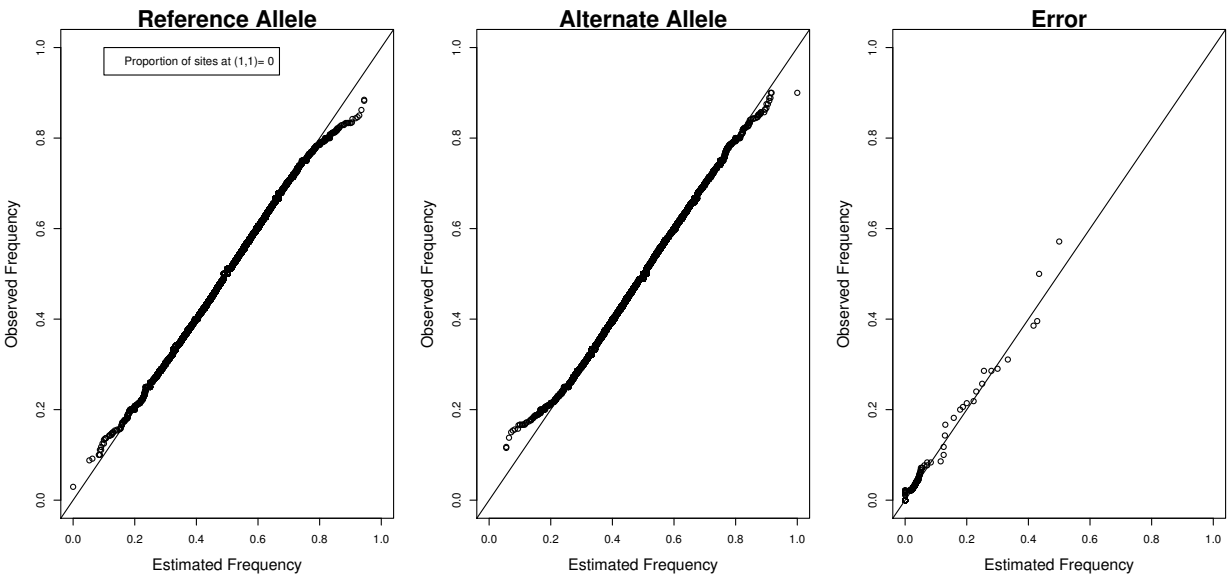

### Multinomial CEU13 Chr10

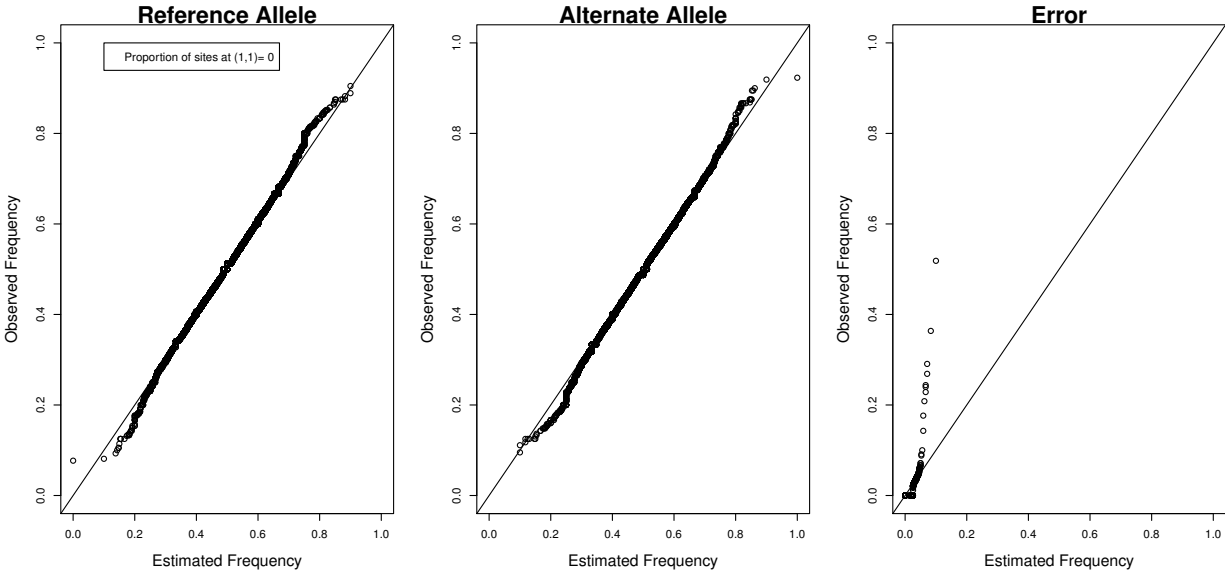

### Biased Multinomial CEU13 Chr10

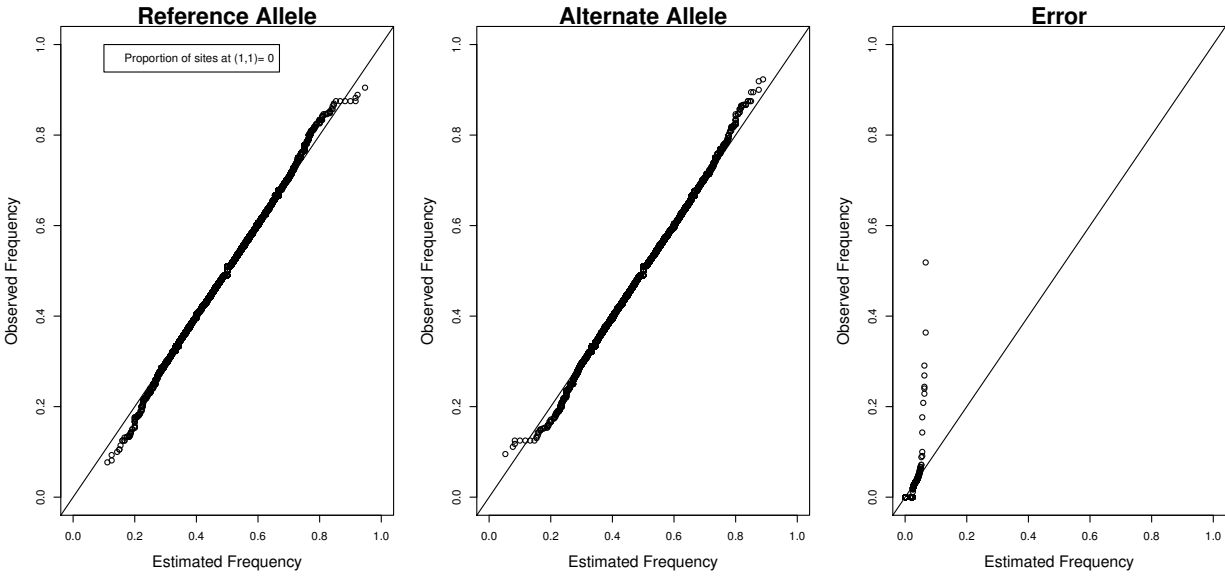



# Dirichlet Multinomial CEU13 Chr10

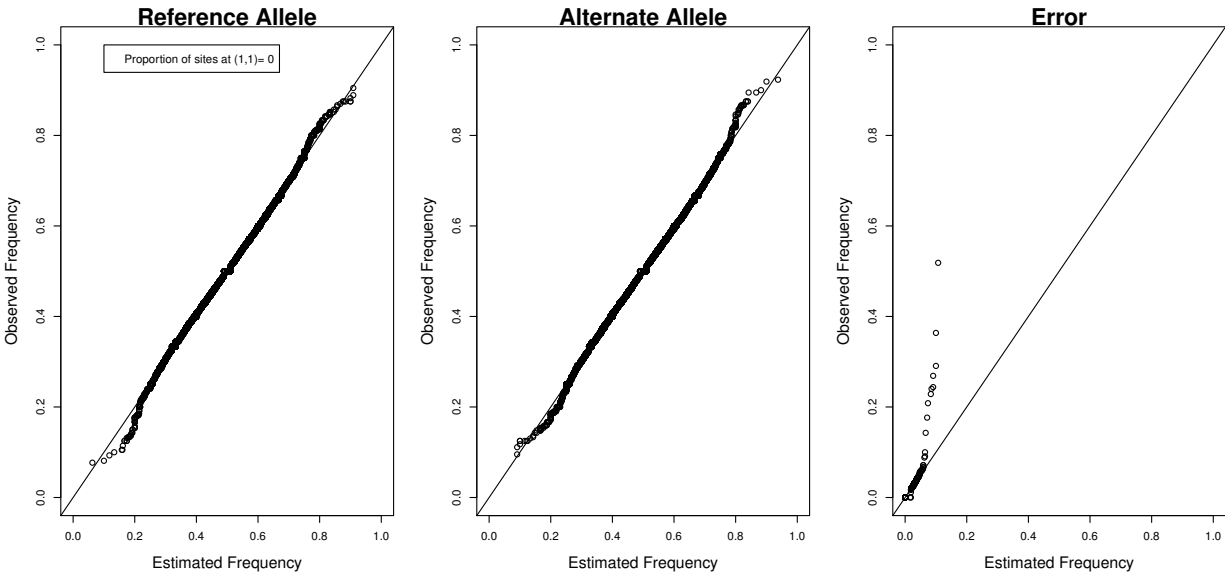

# Mixture of Dirichlet Multinomial CEU13 Chr10 2 components

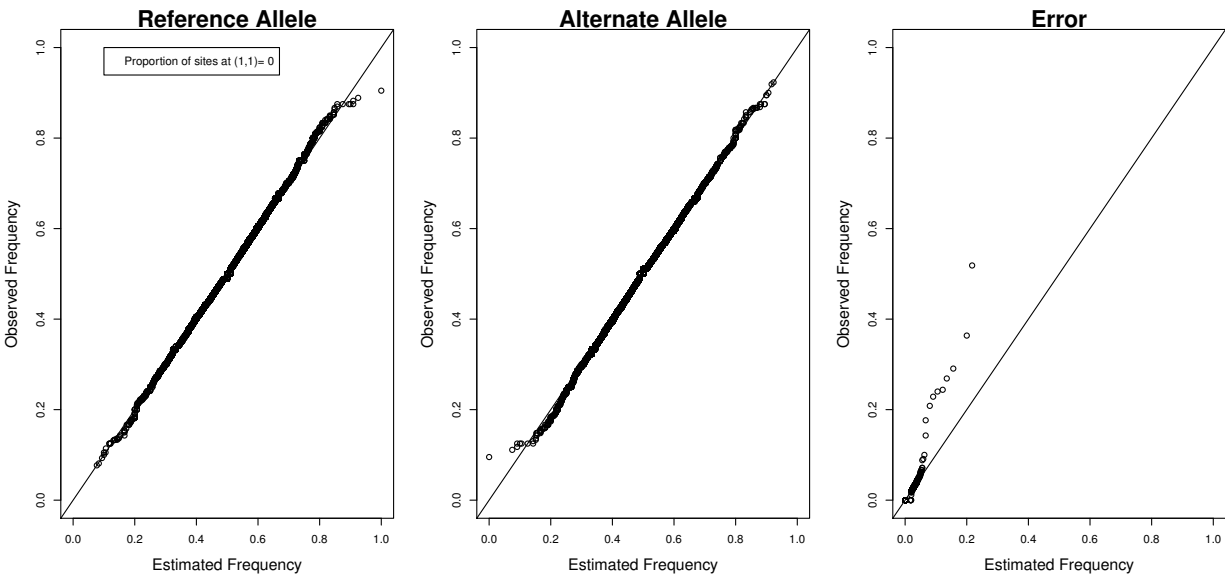

### Mixture of Dirichlet Multinomial CEU13 Chr10 3 components

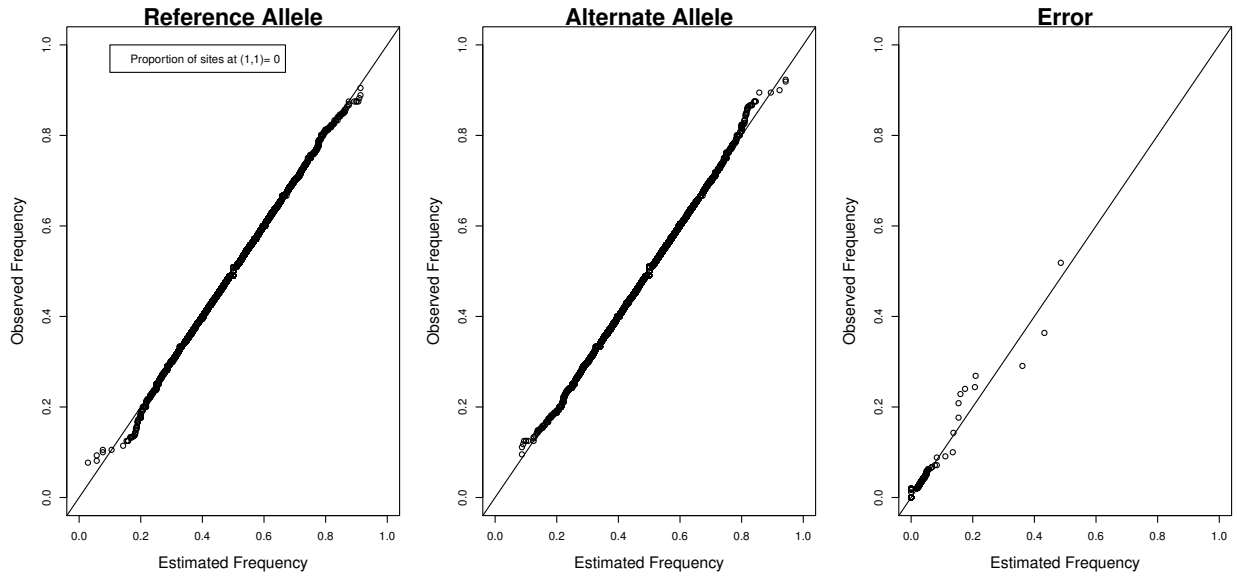

### Mixture of Dirichlet Multinomial CEU13 Chr10 4 components

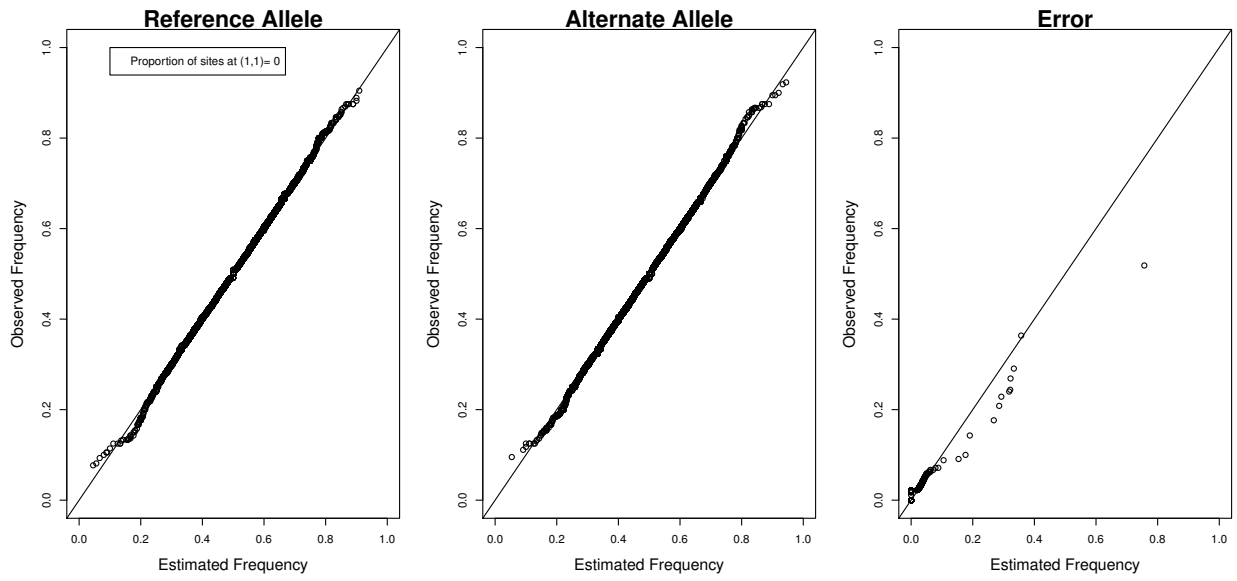

### Mixture of Dirichlet Multinomial CEU13 Chr10 5 components

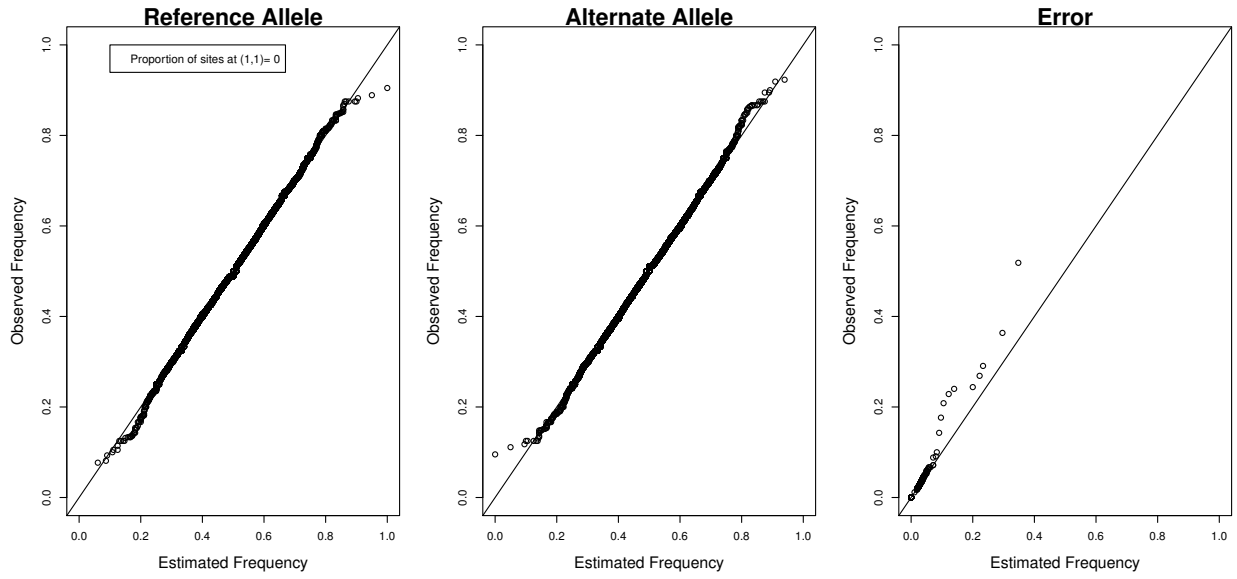

### Mixture of Dirichlet Multinomial CEU13 Chr10 6 components

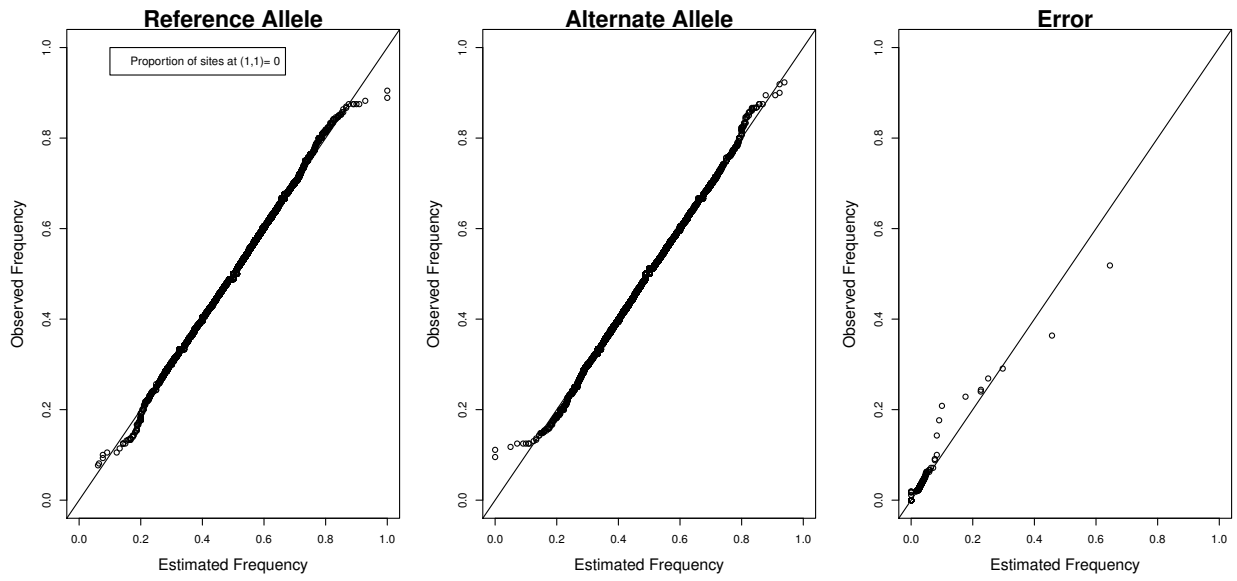

### Multinomial CEU12 Chr21

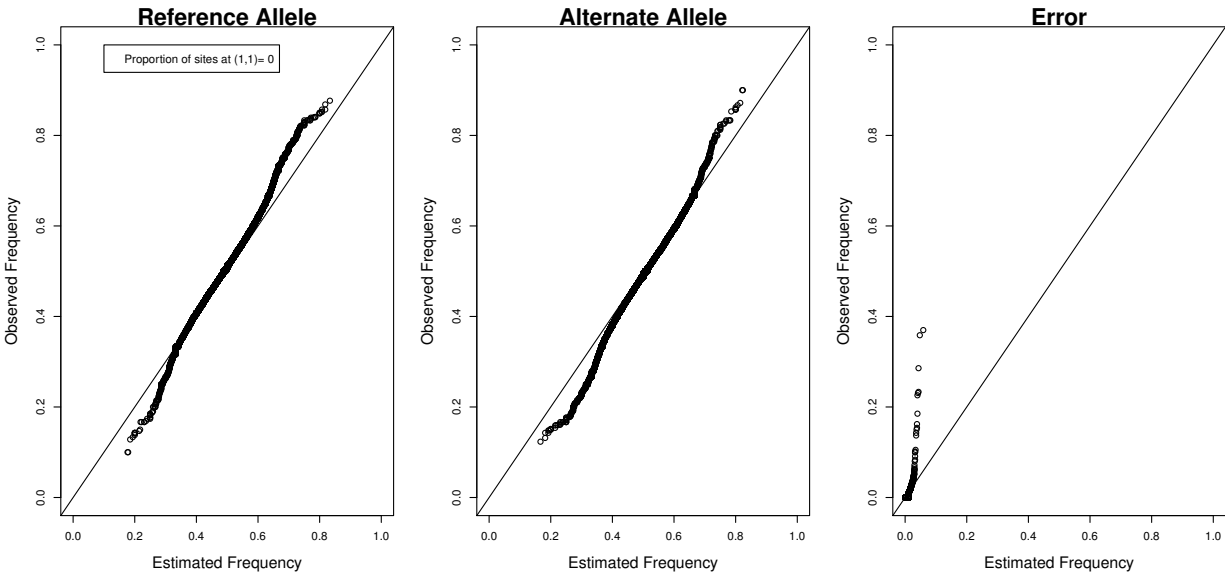

### Biased Multinomial CEU12 Chr21

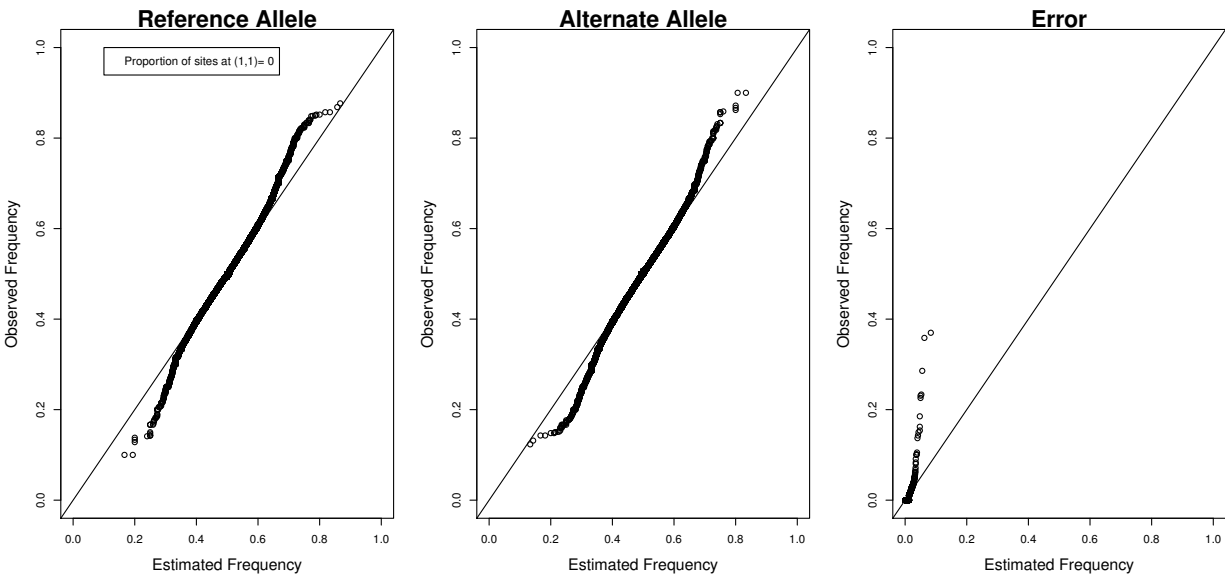

## Dirichlet Multinomial CEU12 Chr21

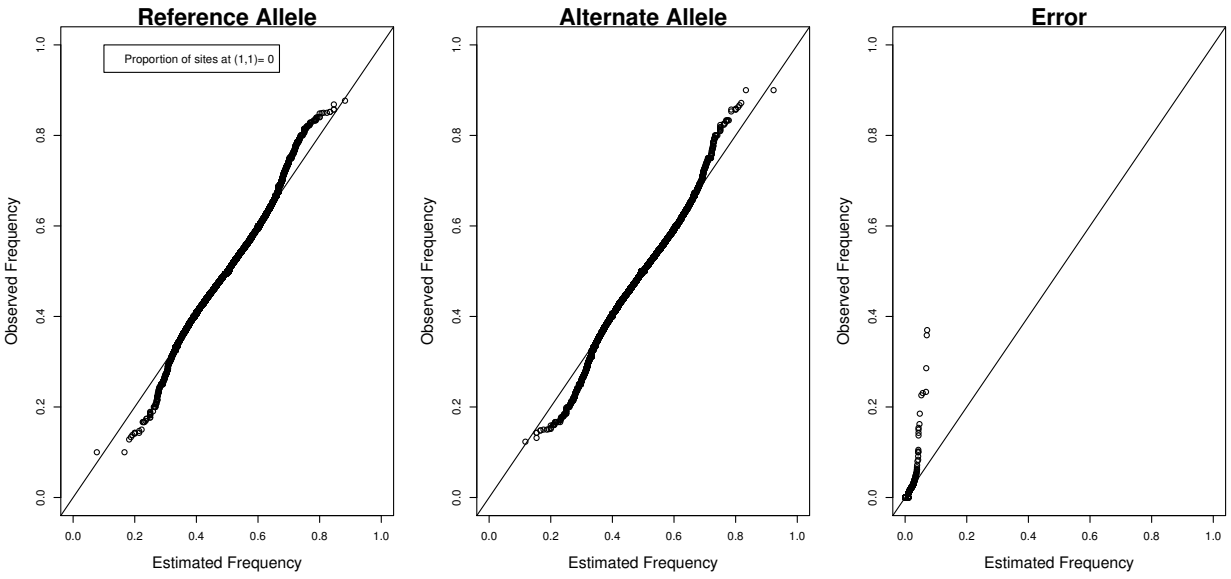

## Mixture of Dirichlet Multinomial CEU12 Chr21 2 components

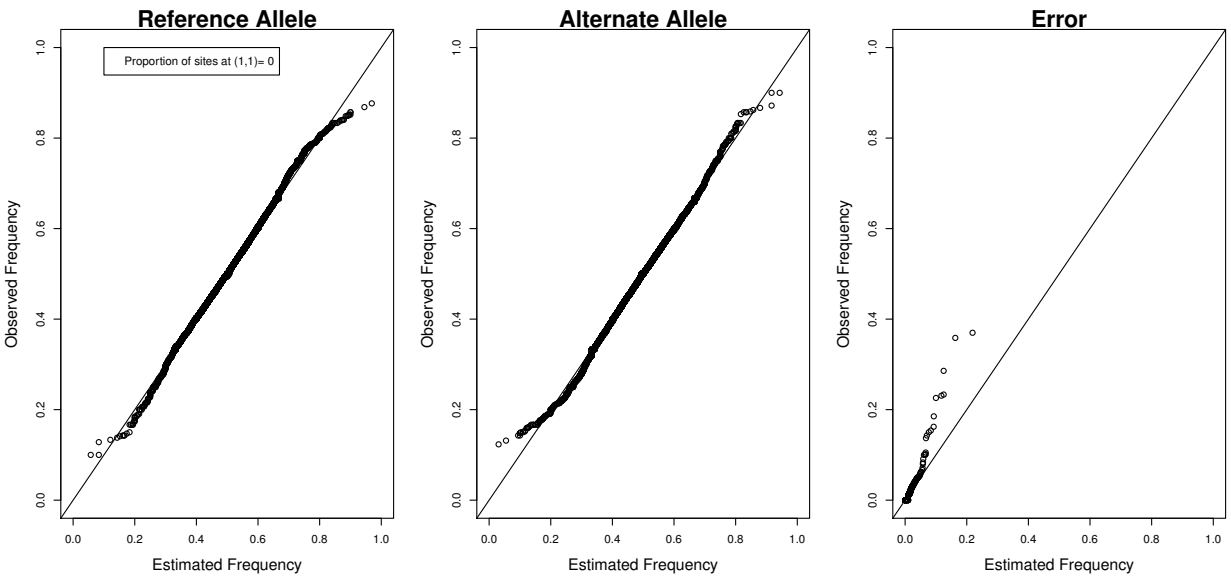

### Mixture of Dirichlet Multinomial CEU12 Chr21 3 components

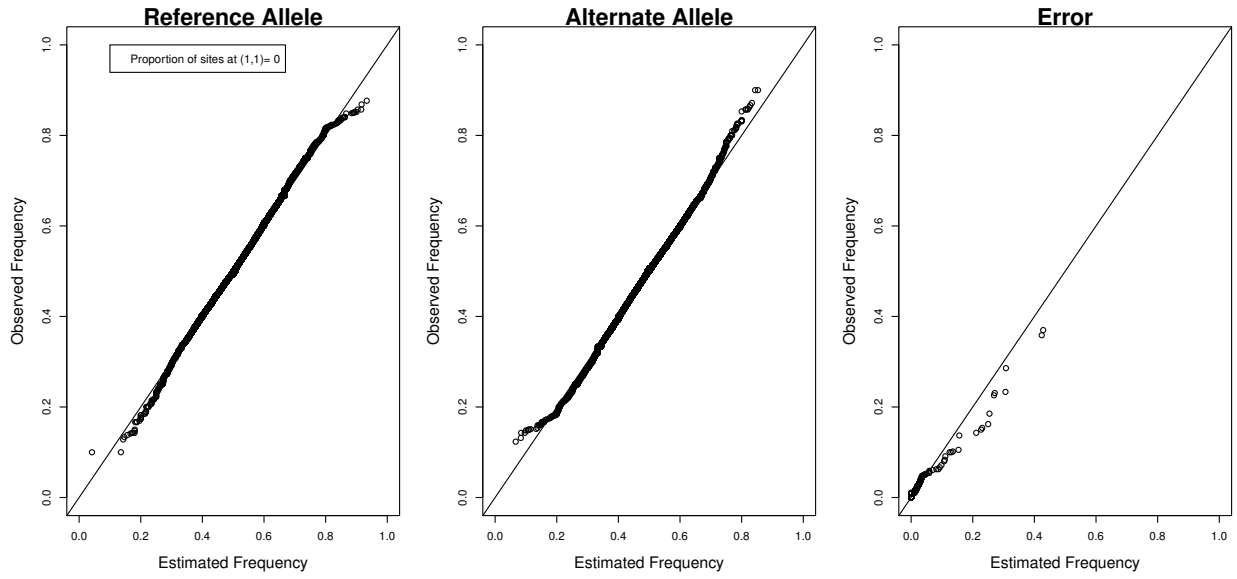

### Mixture of Dirichlet Multinomial CEU12 Chr21 4 components

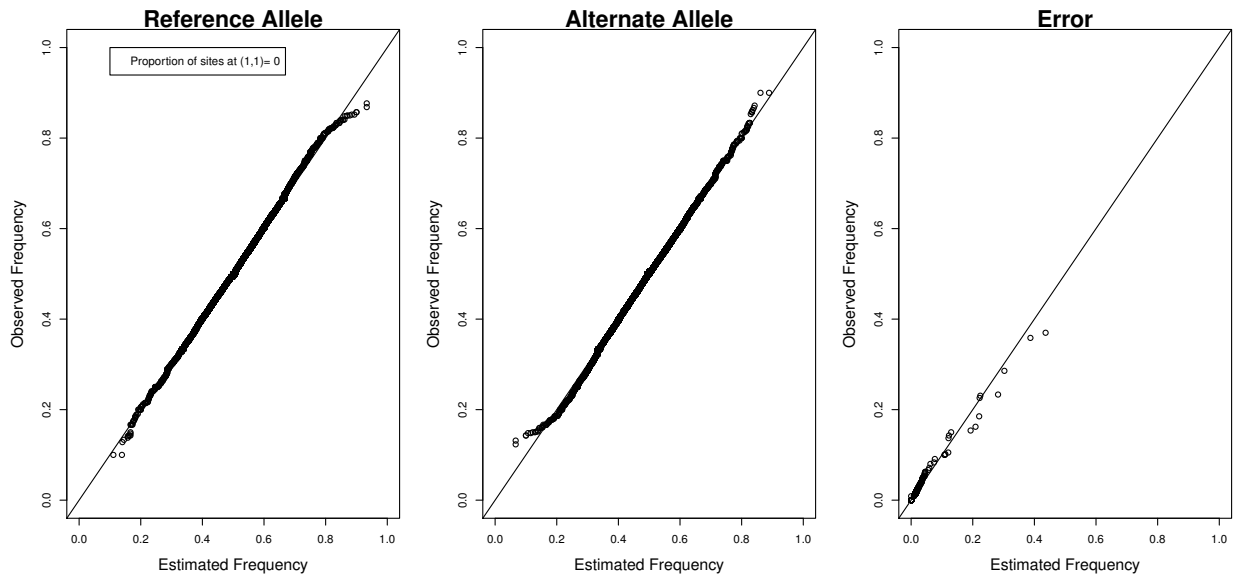

### Mixture of Dirichlet Multinomial CEU12 Chr21 5 components

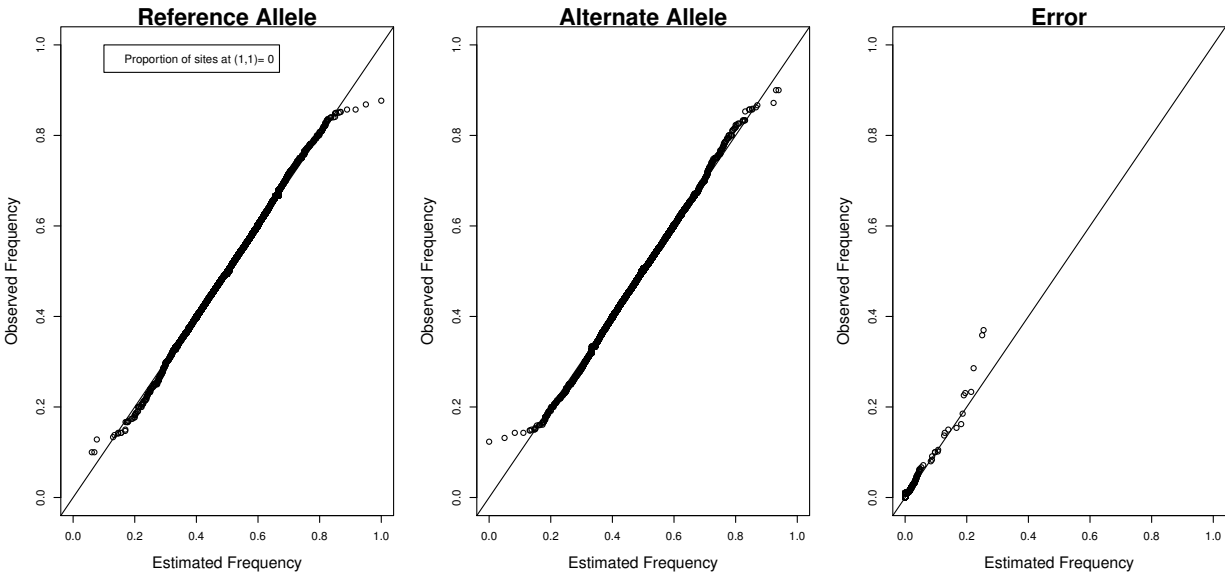

### Mixture of Dirichlet Multinomial CEU12 Chr21 6 components

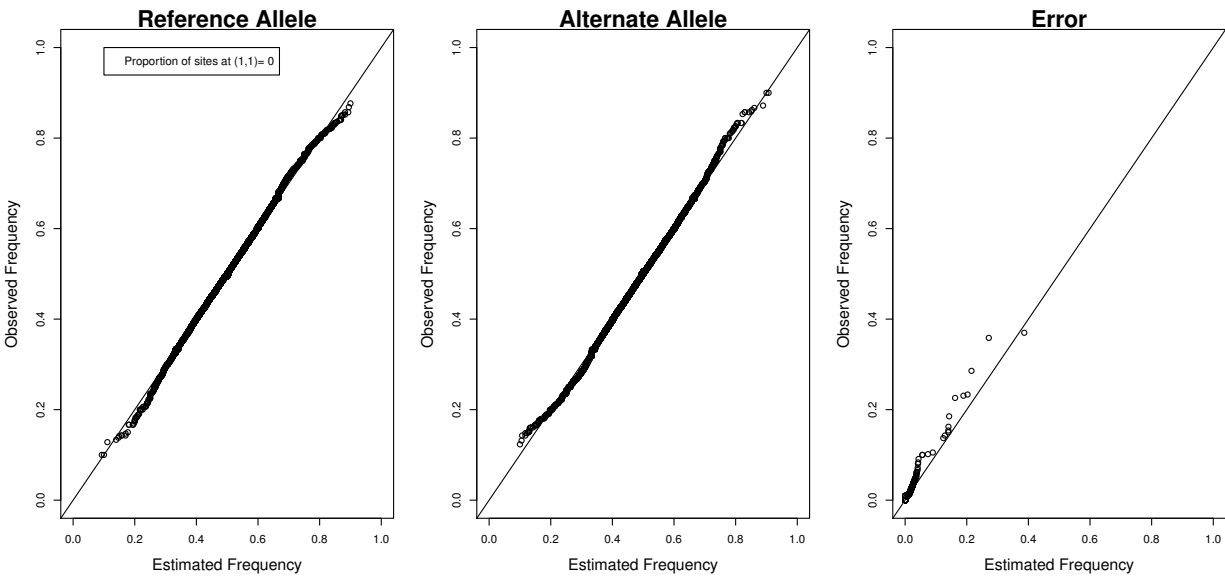

### Multinomial CEU12 Chr10

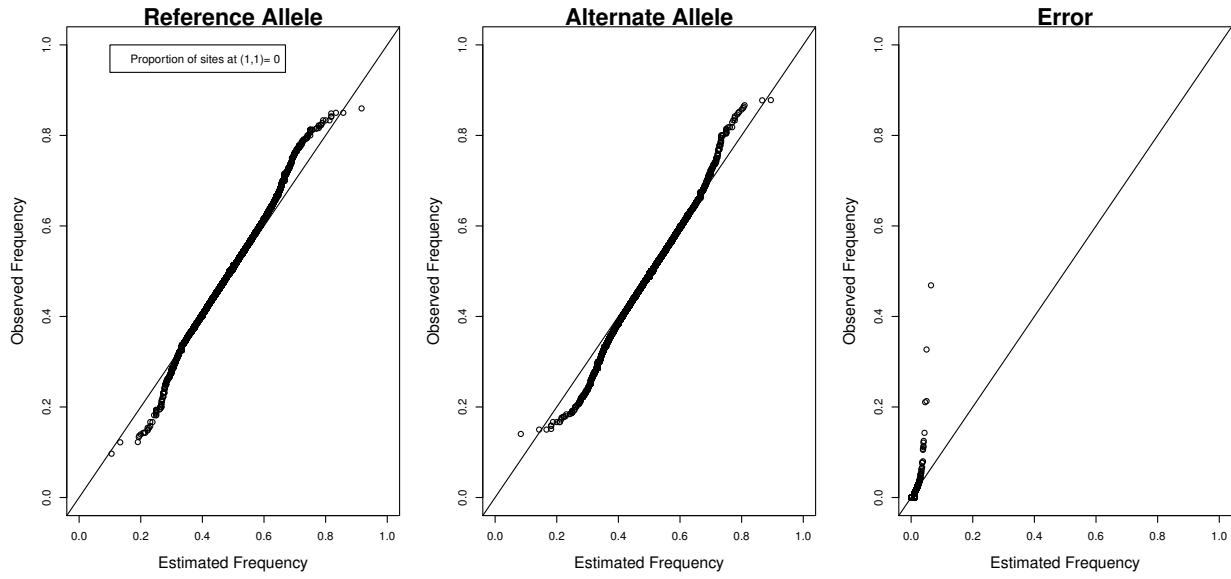

### Biased Multinomial CEU12 Chr10

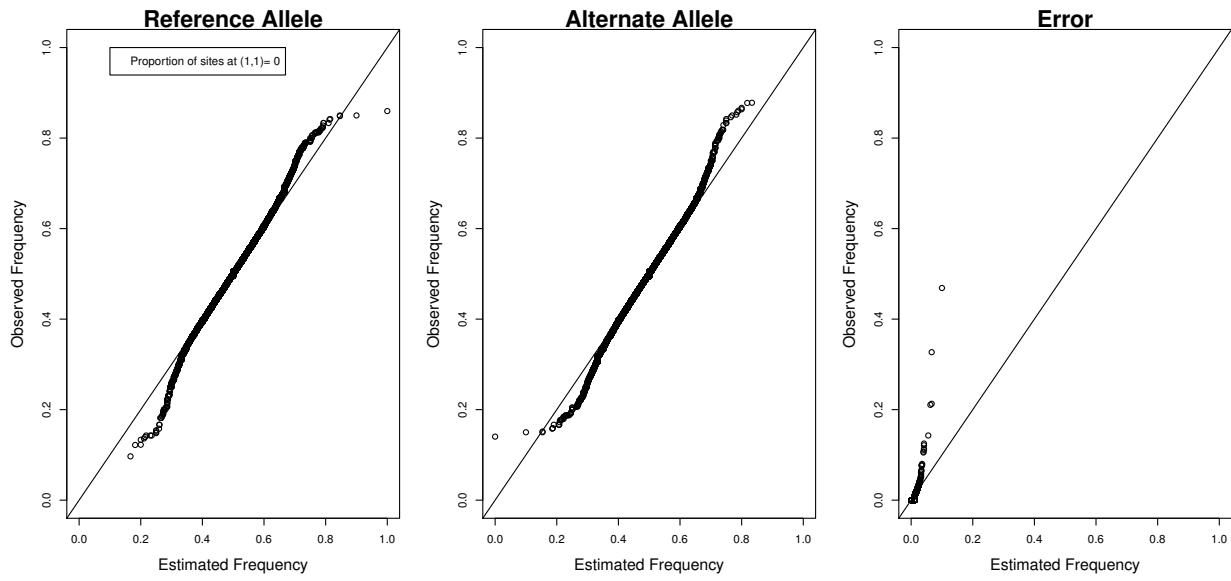



# Dirichlet Multinomial CEU12 Chr10

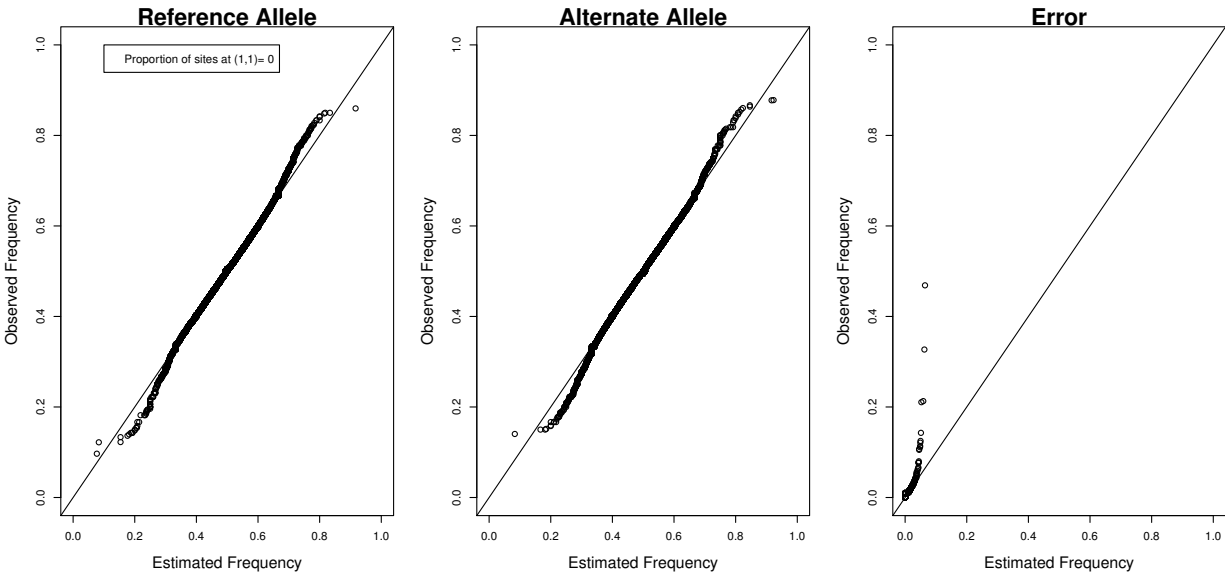

# Mixture of Dirichlet Multinomial CEU12 Chr10 2 components

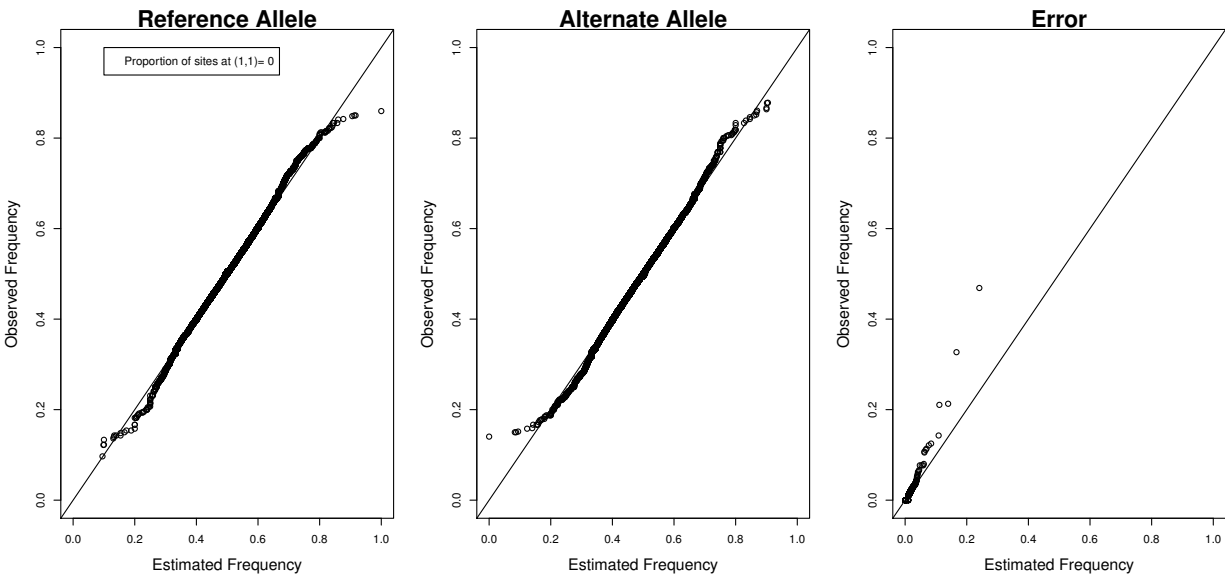

### Mixture of Dirichlet Multinomial CEU12 Chr10 3 components

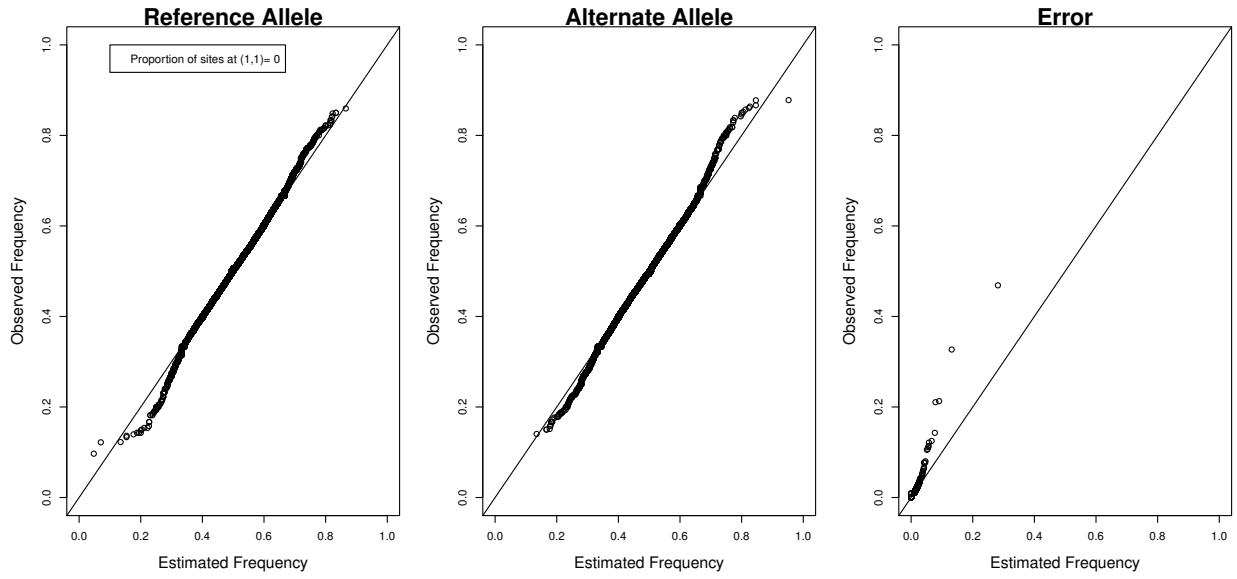

### Mixture of Dirichlet Multinomial CEU12 Chr10 4 components

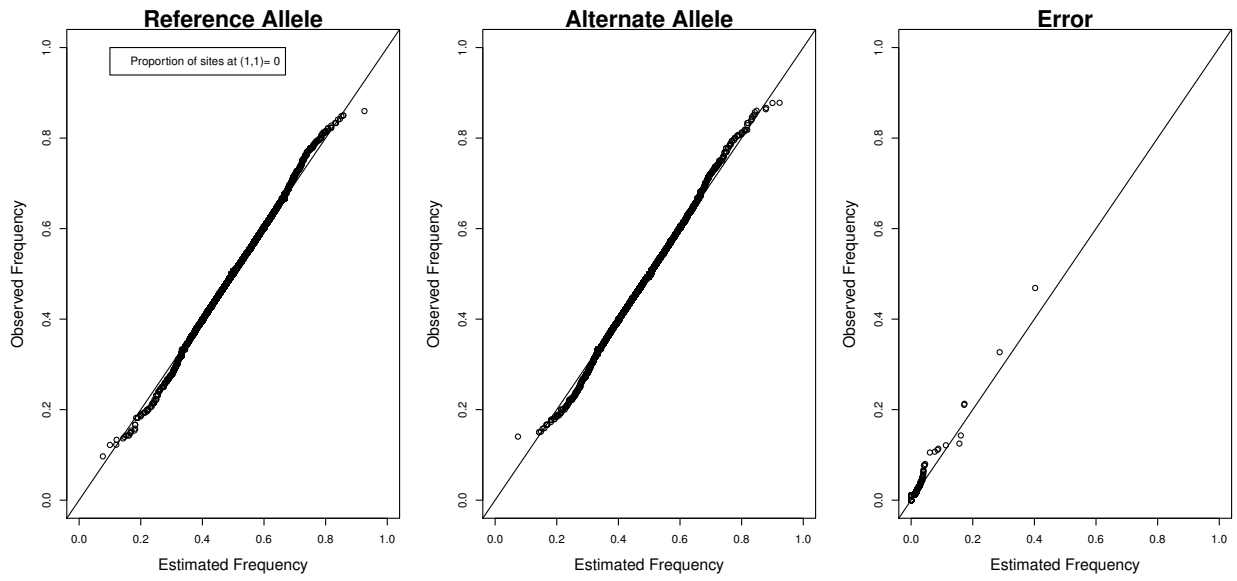

### Mixture of Dirichlet Multinomial CEU12 Chr10 5 components

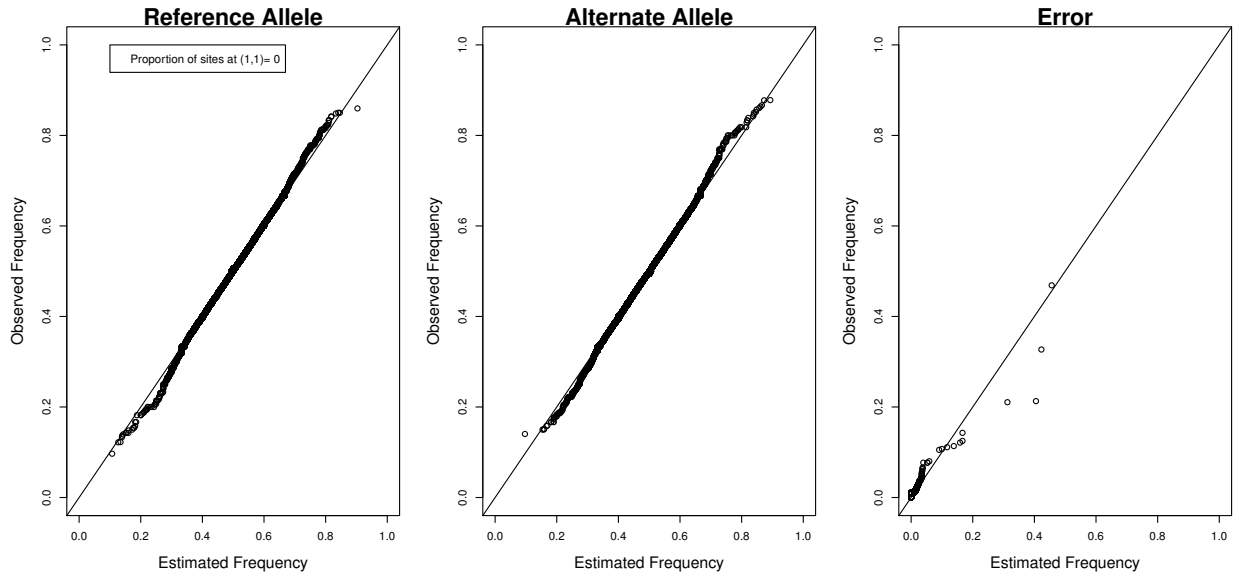

### Mixture of Dirichlet Multinomial CEU12 Chr10 6 components

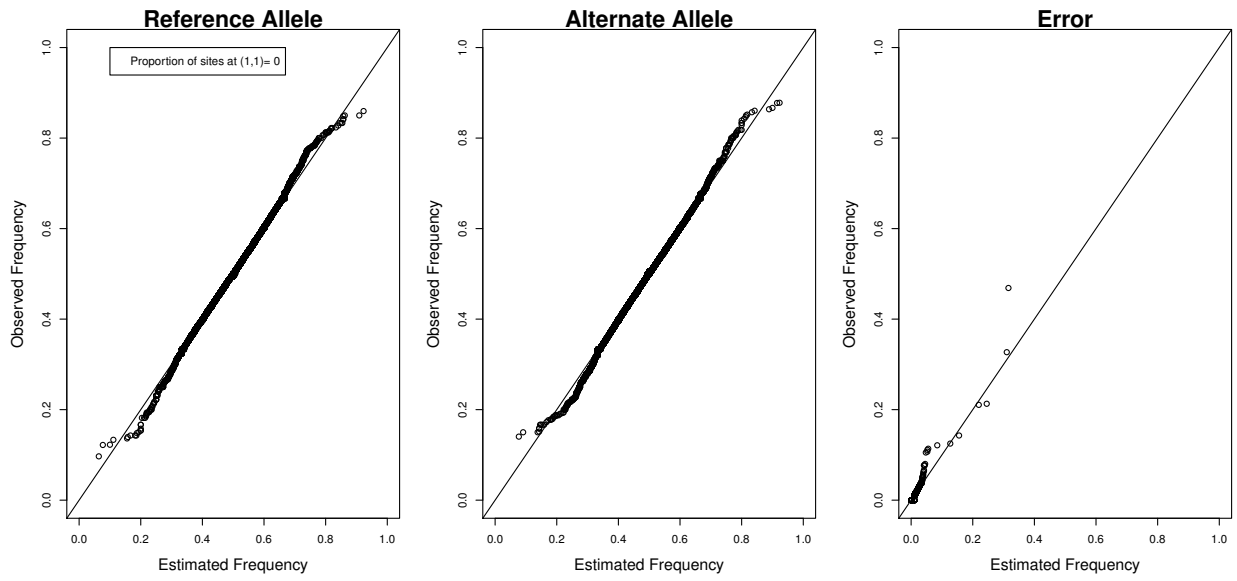

### Multinomial CEU11 Chr21

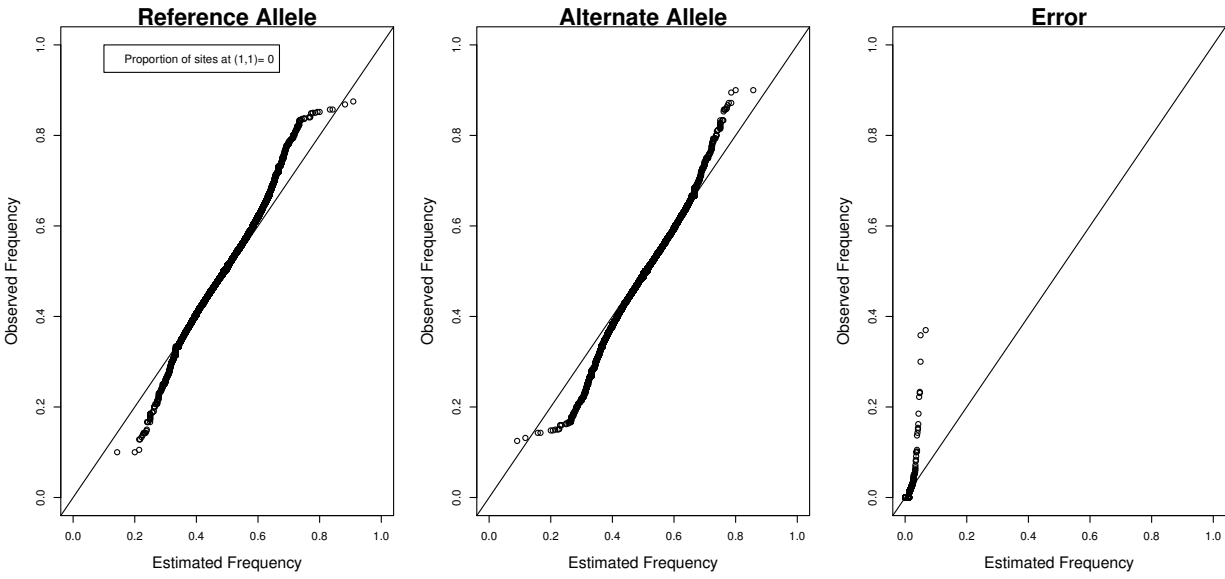

### Biased Multinomial CEU11 Chr21

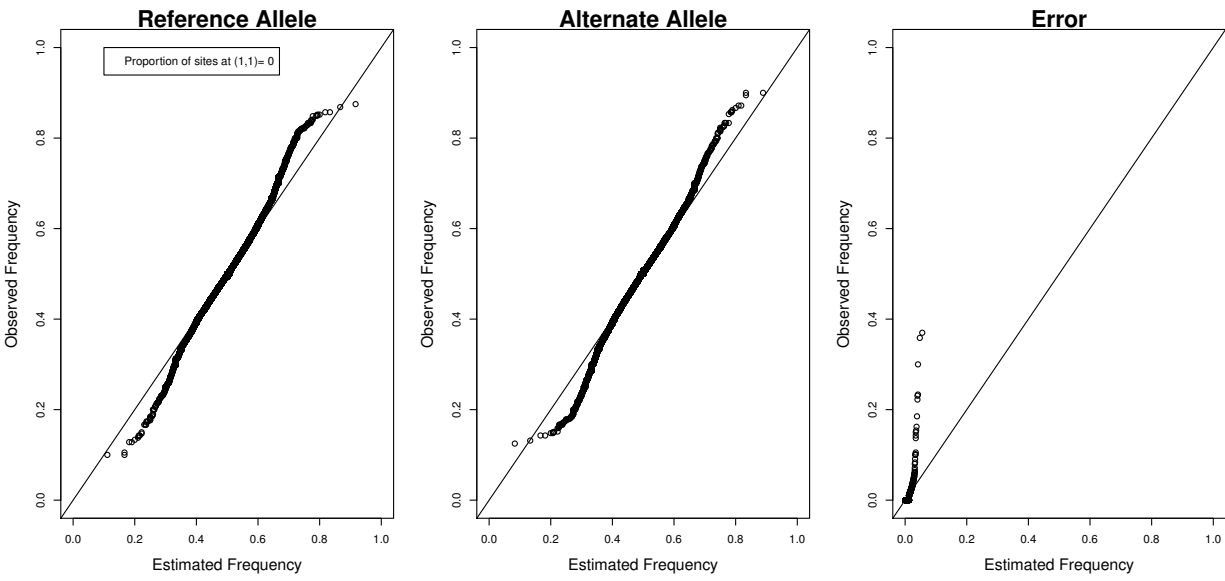

## Dirichlet Multinomial CEU11 Chr21

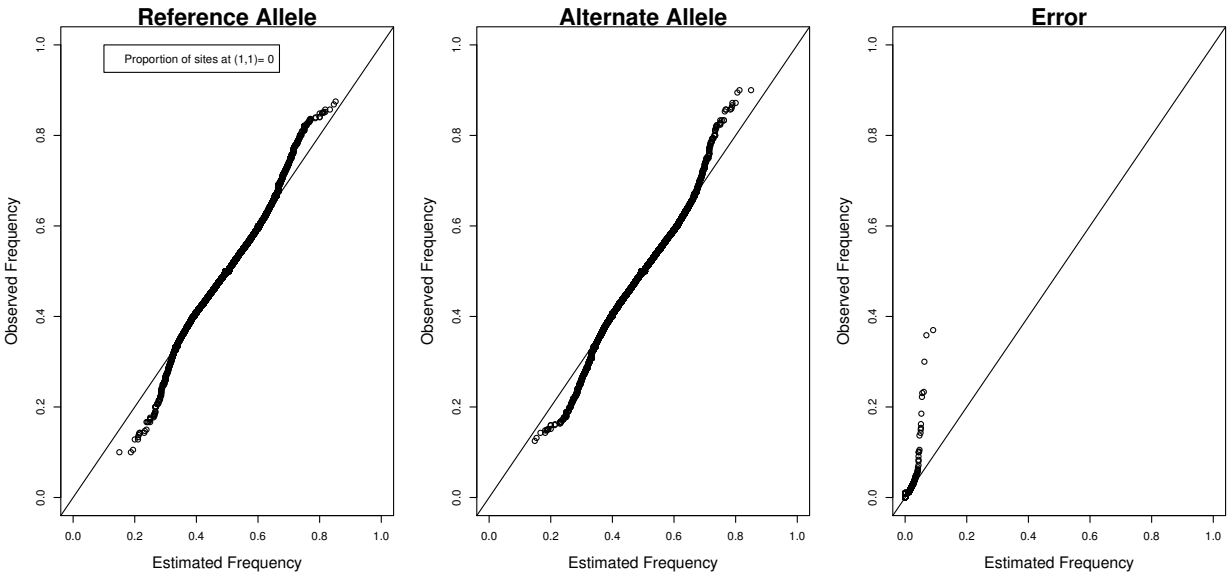

## Mixture of Dirichlet Multinomial CEU11 Chr21 2 components

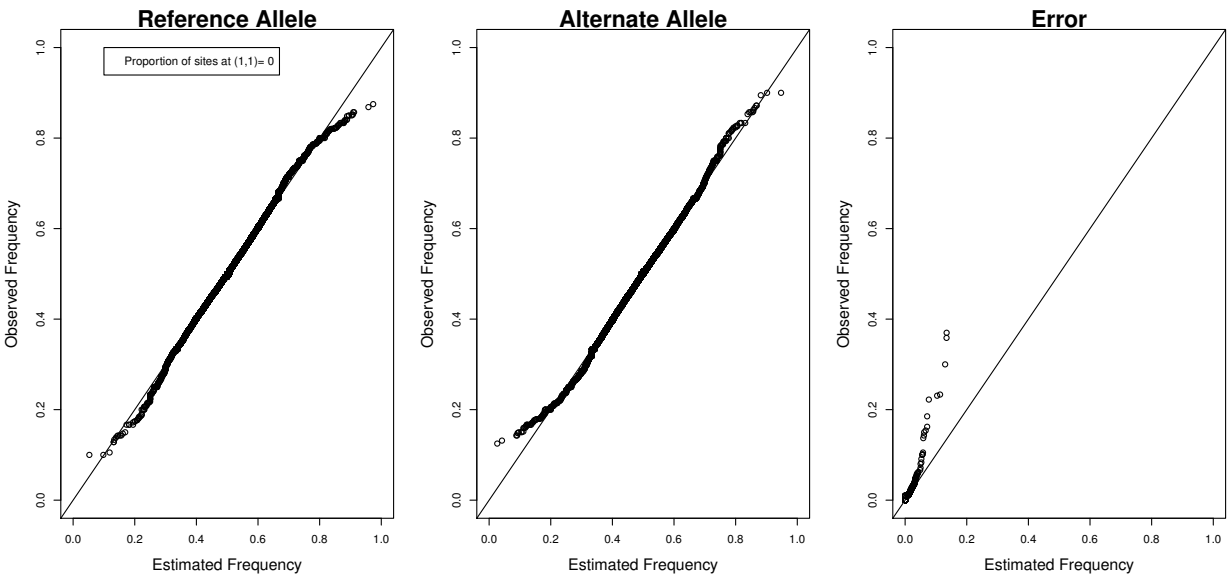

### Mixture of Dirichlet Multinomial CEU11 Chr21 3 components

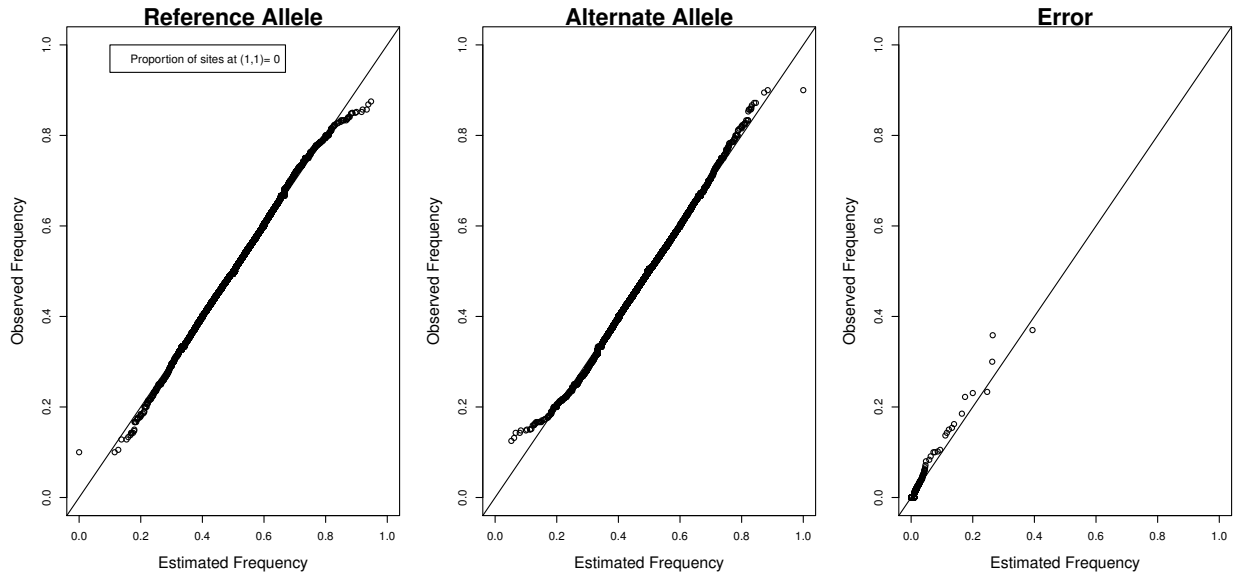

### Mixture of Dirichlet Multinomial CEU11 Chr21 4 components

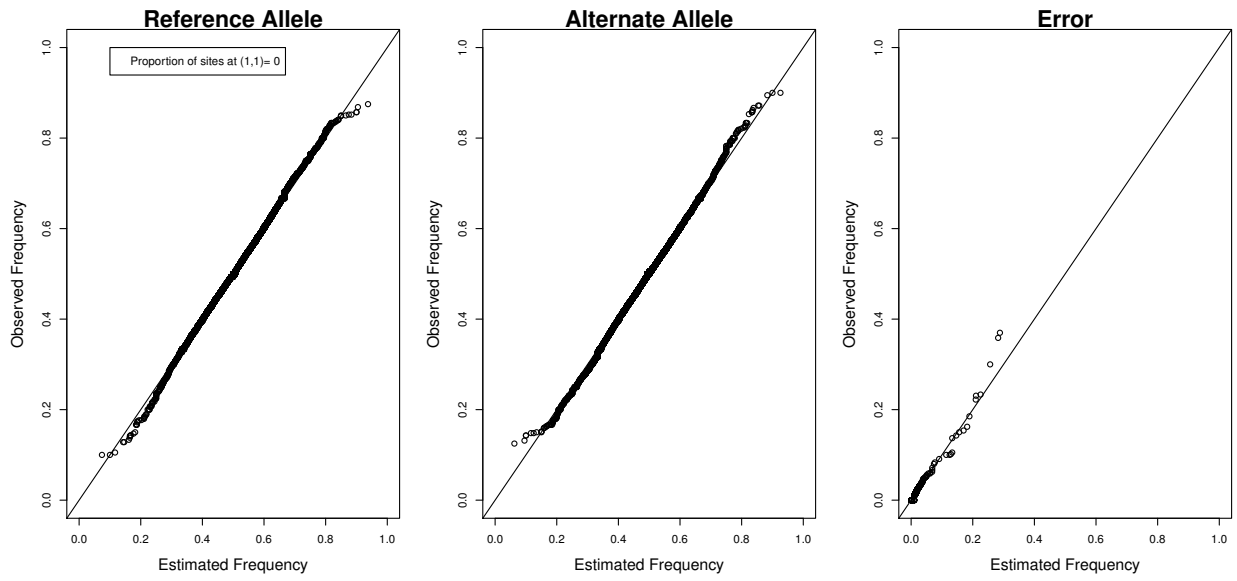

### Mixture of Dirichlet Multinomial CEU11 Chr21 5 components

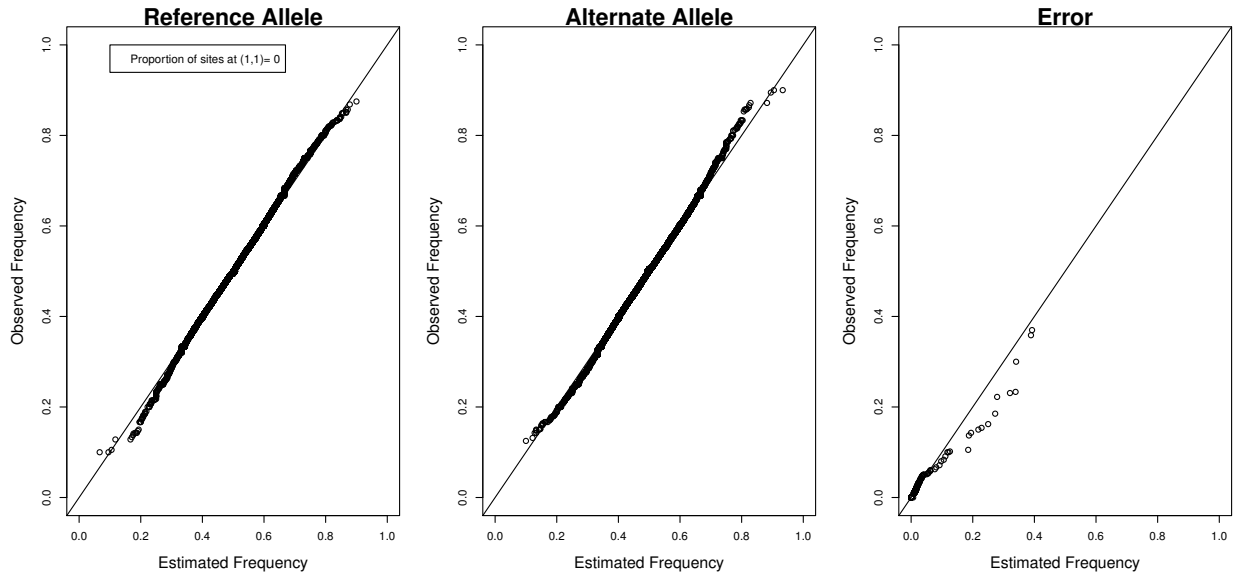

### Mixture of Dirichlet Multinomial CEU11 Chr21 6 components

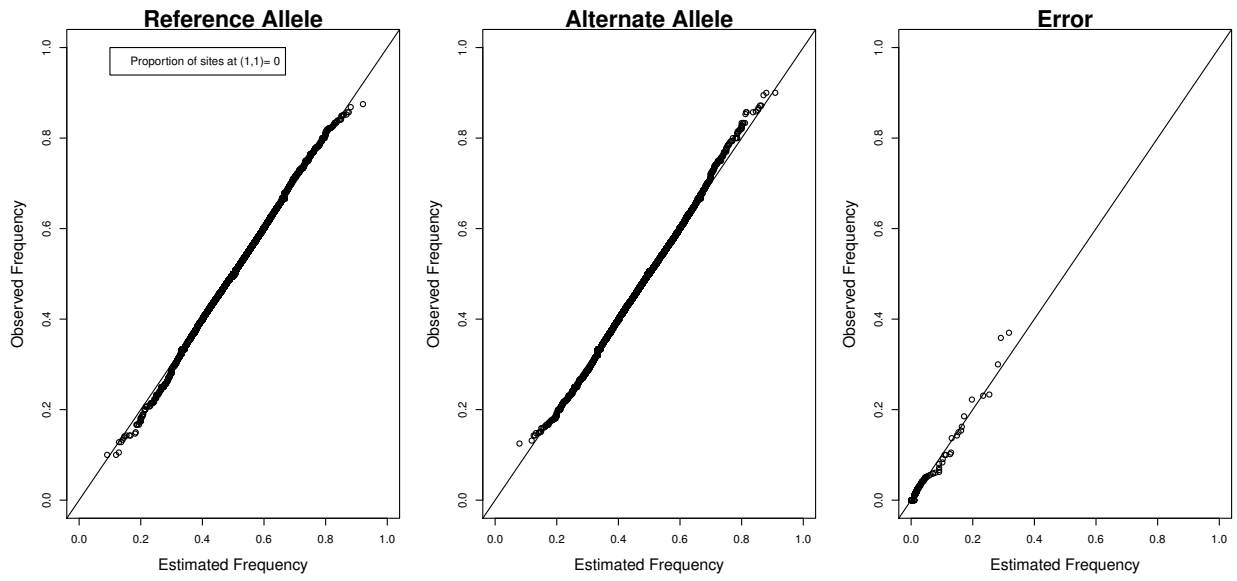

### Multinomial CEU11 Chr10

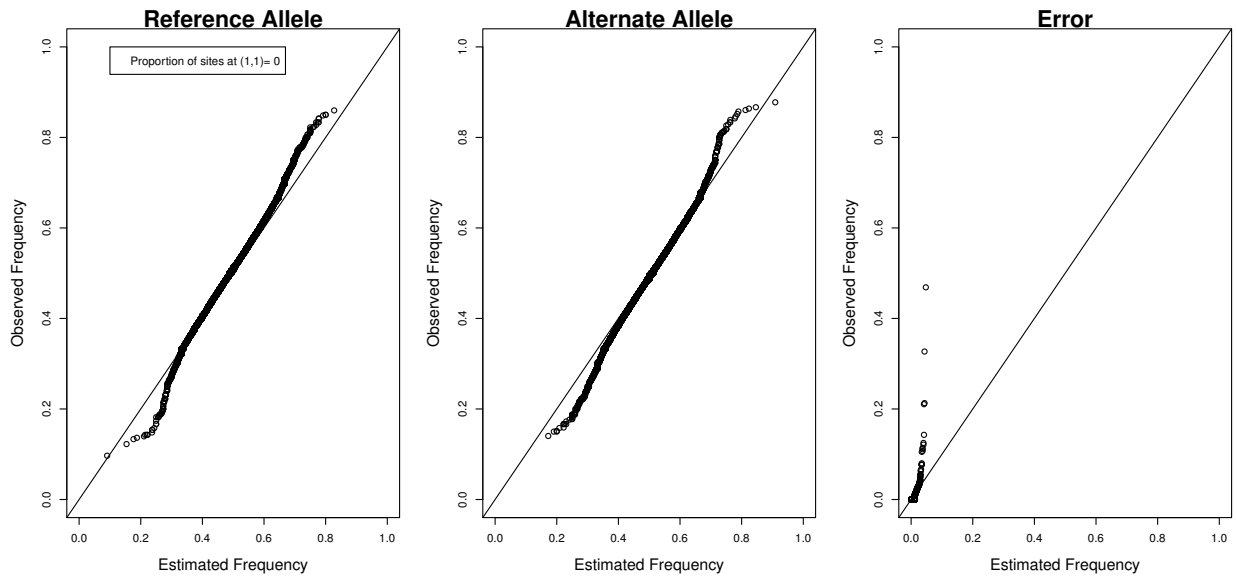

### Biased Multinomial CEU11 Chr10

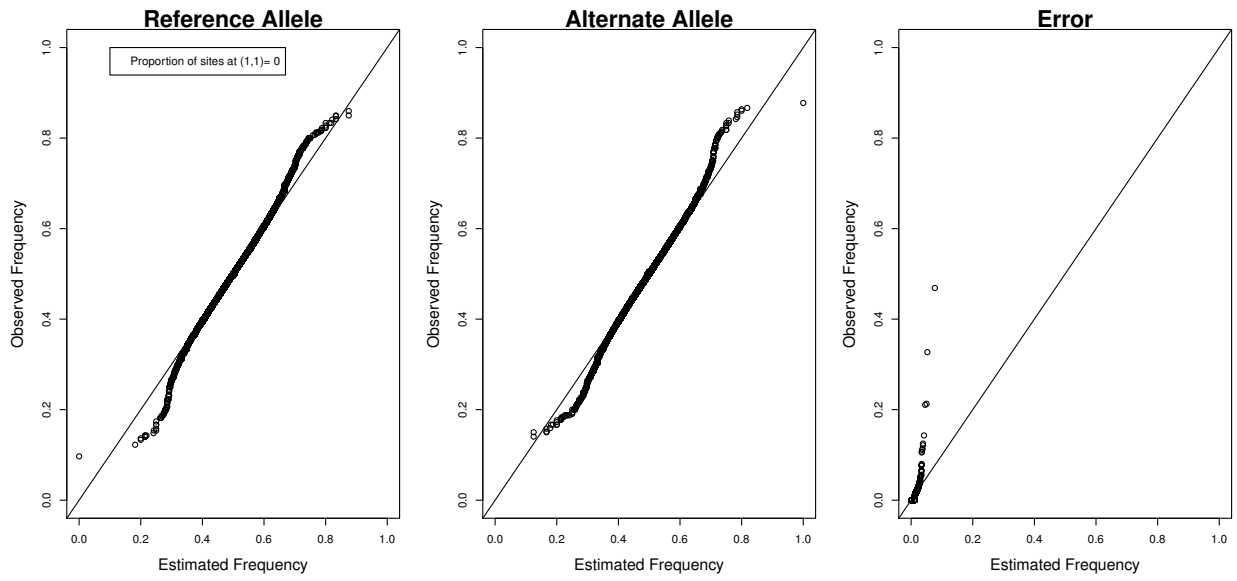



## Dirichlet Multinomial CEU11 Chr10

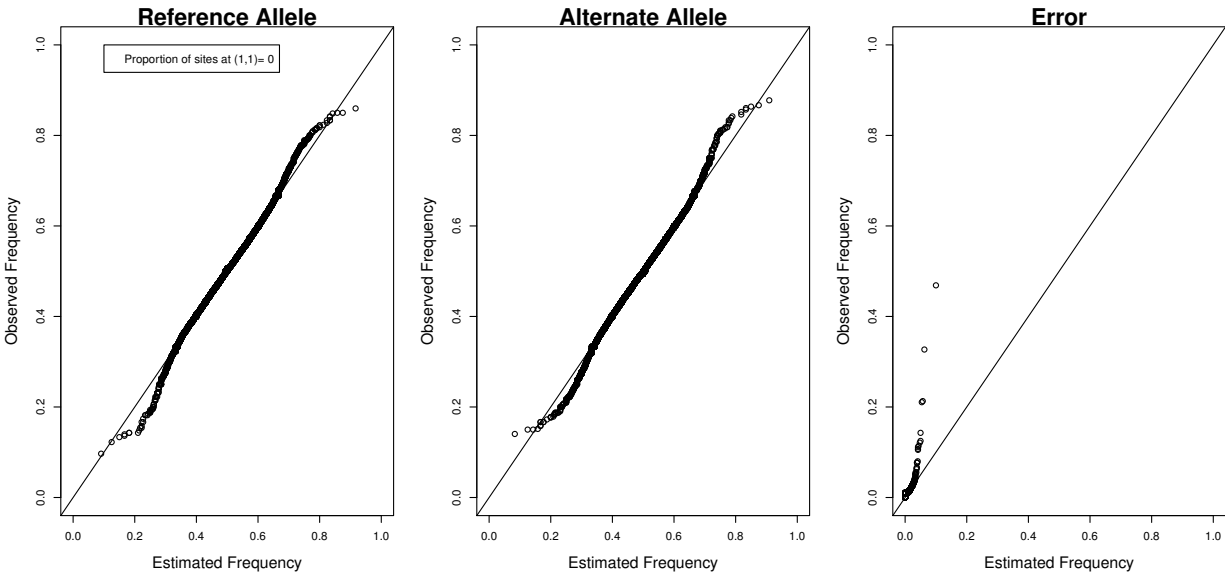

## Mixture of Dirichlet Multinomial CEU11 Chr10 2 components

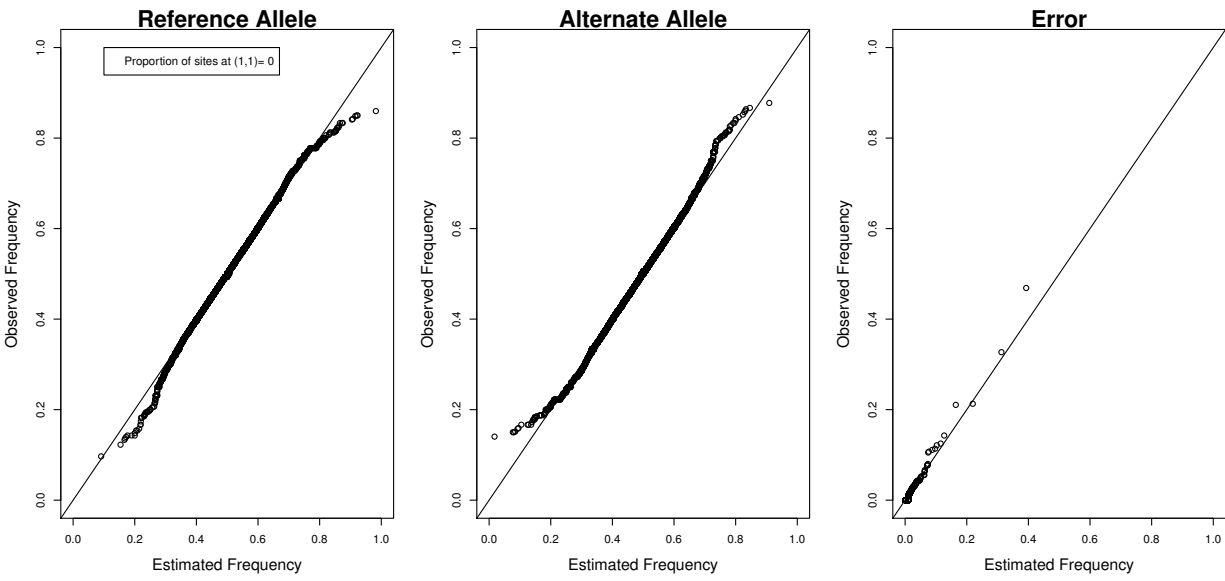

### Mixture of Dirichlet Multinomial CEU11 Chr10 3 components

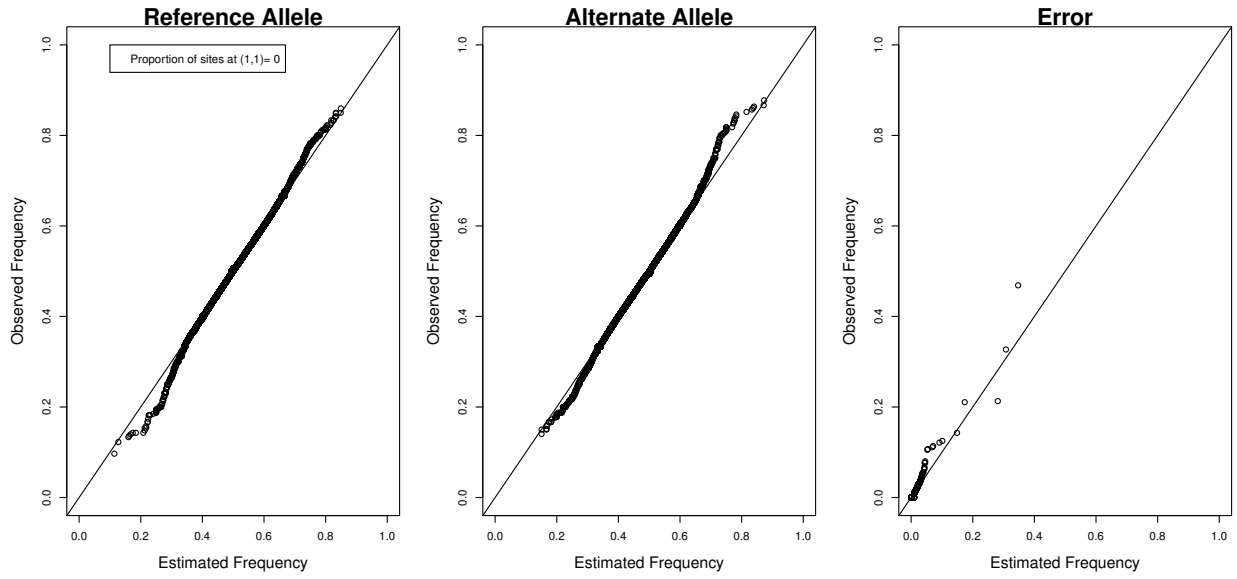

### Mixture of Dirichlet Multinomial CEU11 Chr10 4 components

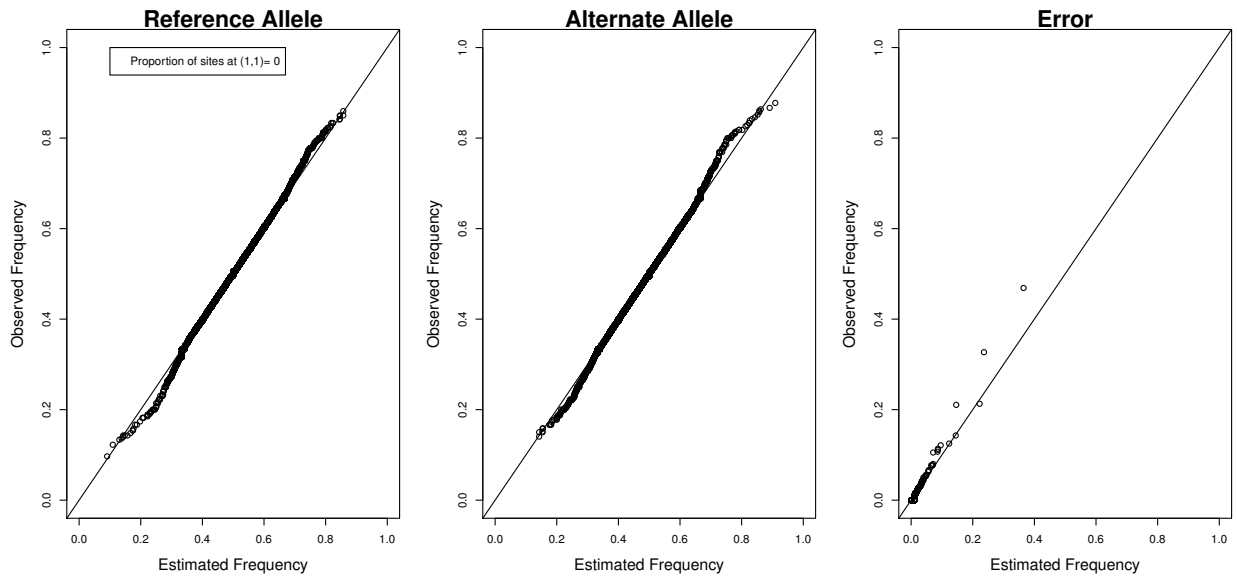

### Mixture of Dirichlet Multinomial CEU11 Chr10 5 components

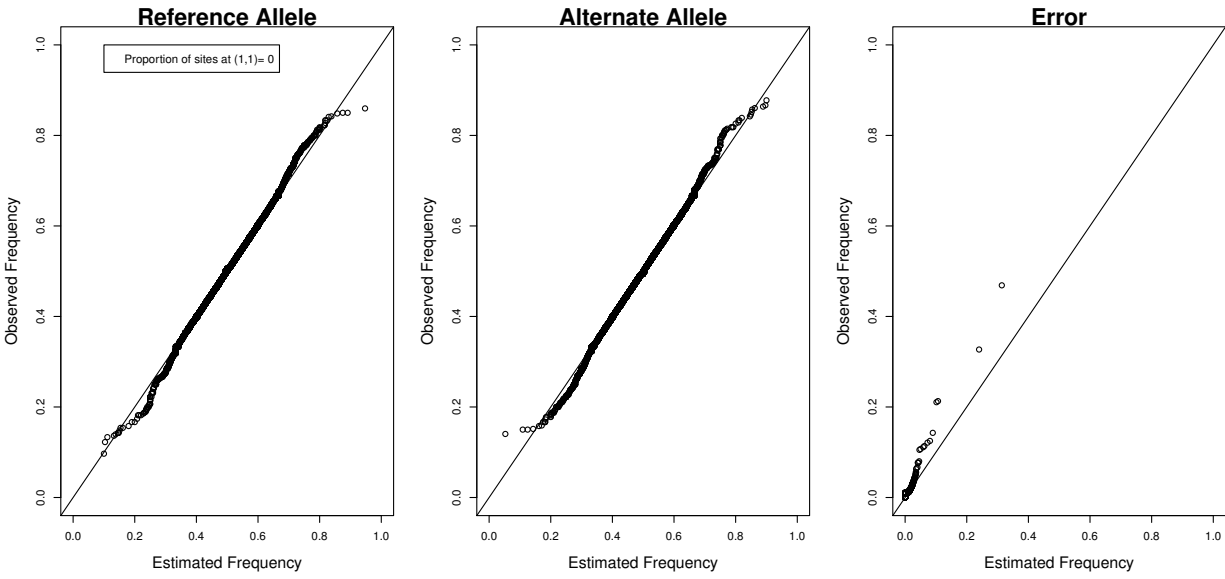

### Mixture of Dirichlet Multinomial CEU11 Chr10 6 components

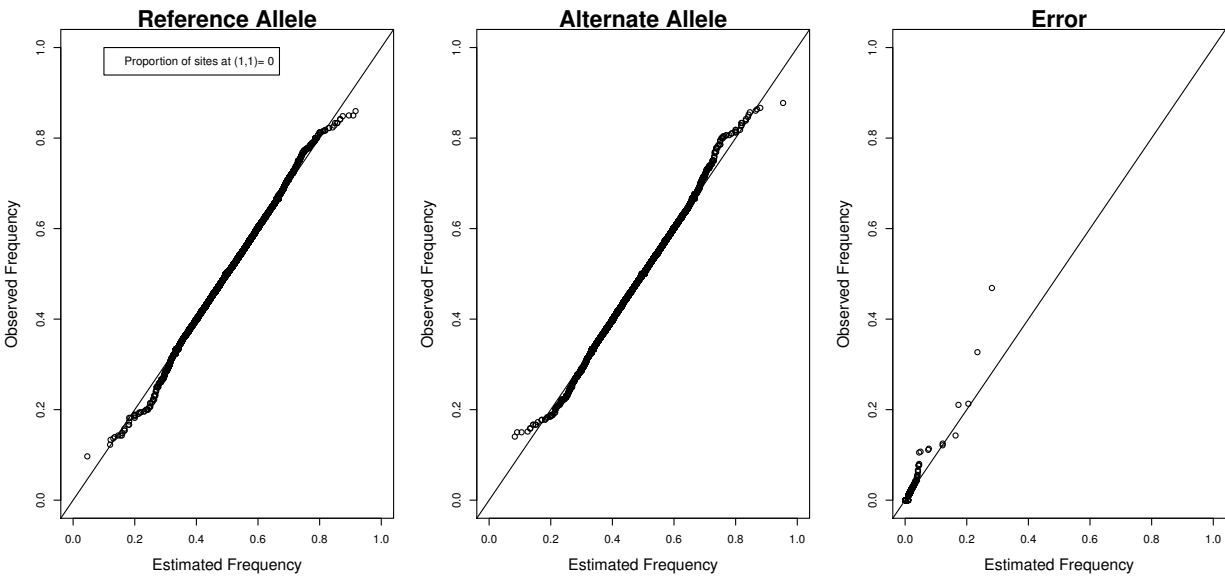

### Multinomial CEU10 Chr21

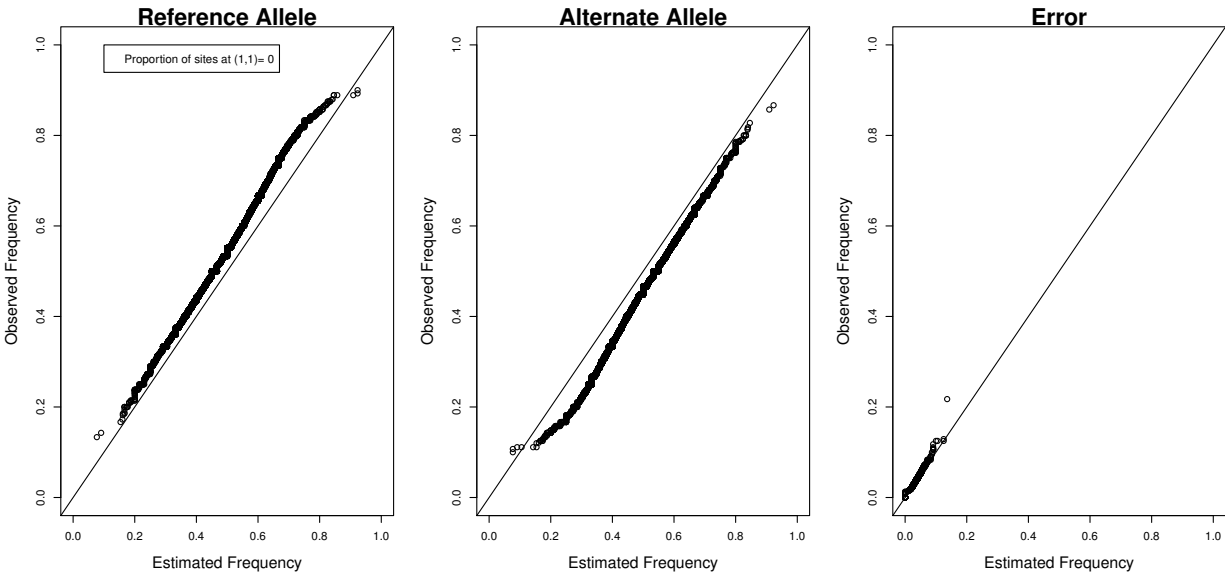

### Biased Multinomial CEU10 Chr21

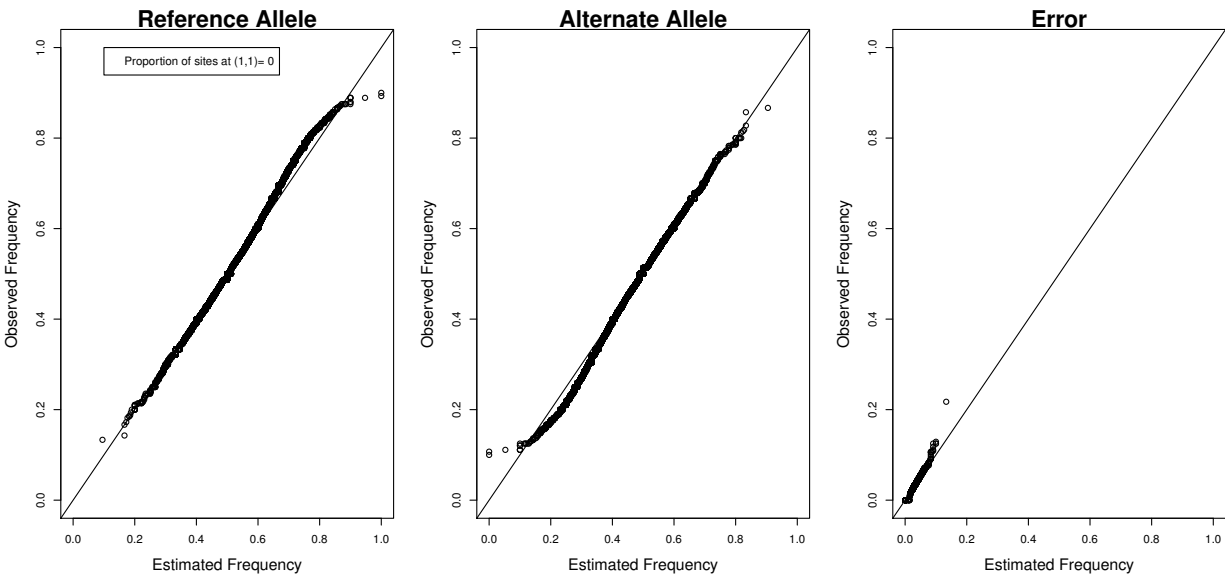

## Dirichlet Multinomial CEU10 Chr21

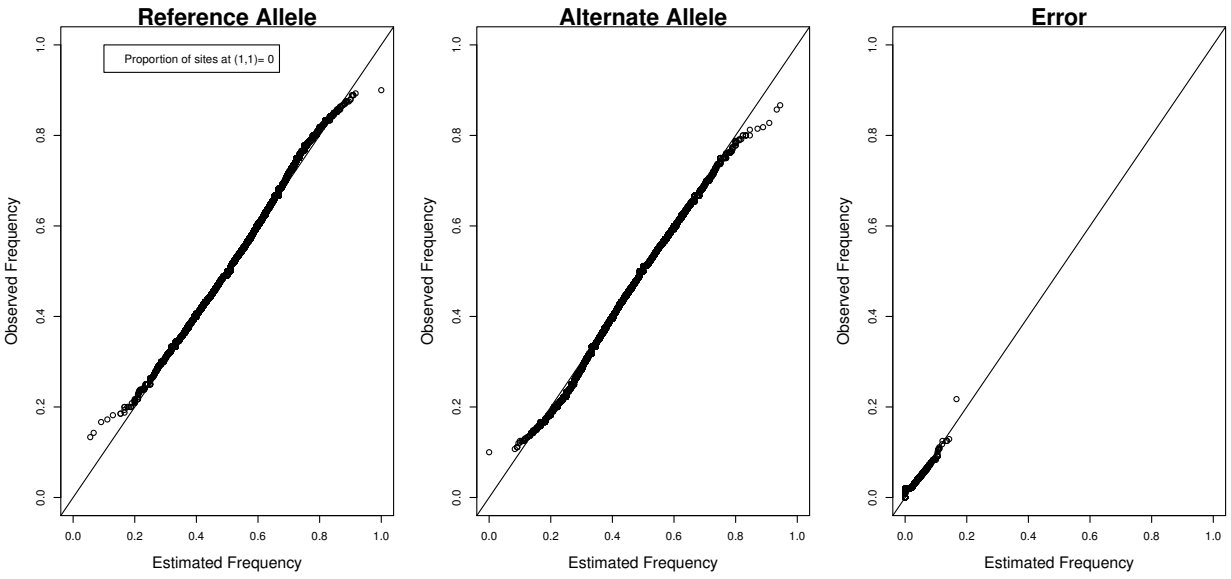

## Mixture of Dirichlet Multinomial CEU10 Chr21 2 components

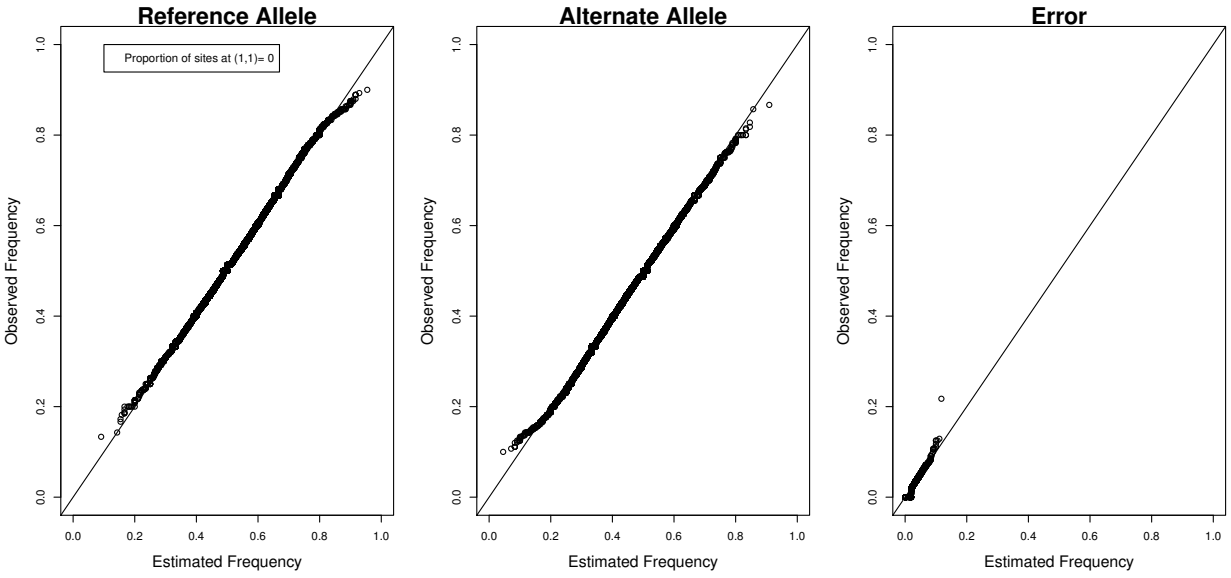

### Mixture of Dirichlet Multinomial CEU10 Chr21 3 components

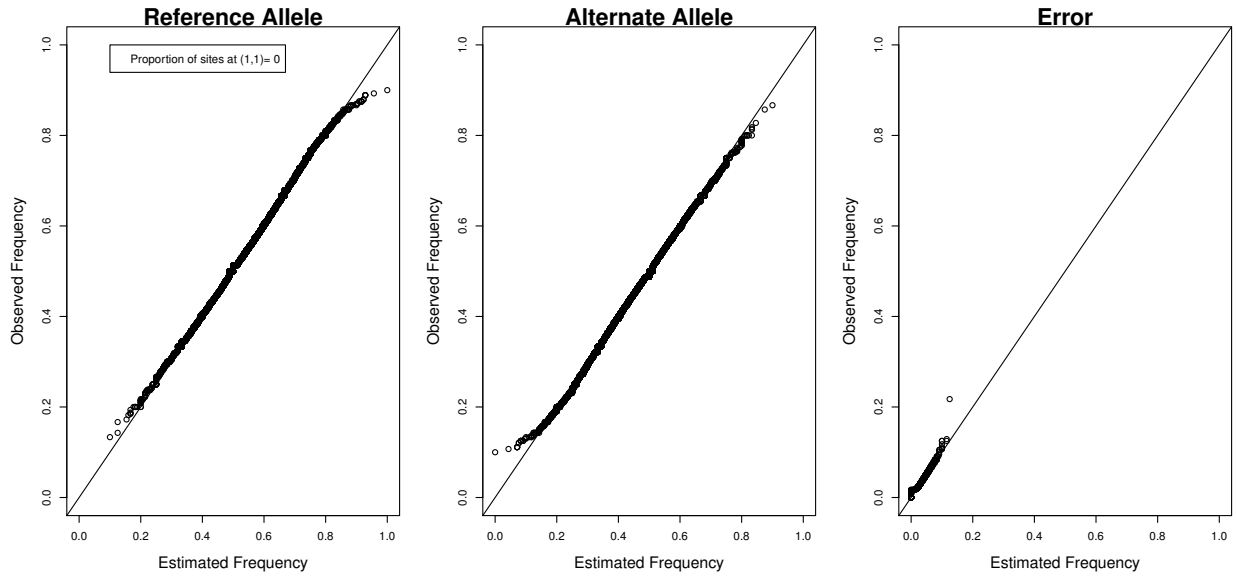

### Mixture of Dirichlet Multinomial CEU10 Chr21 4 components

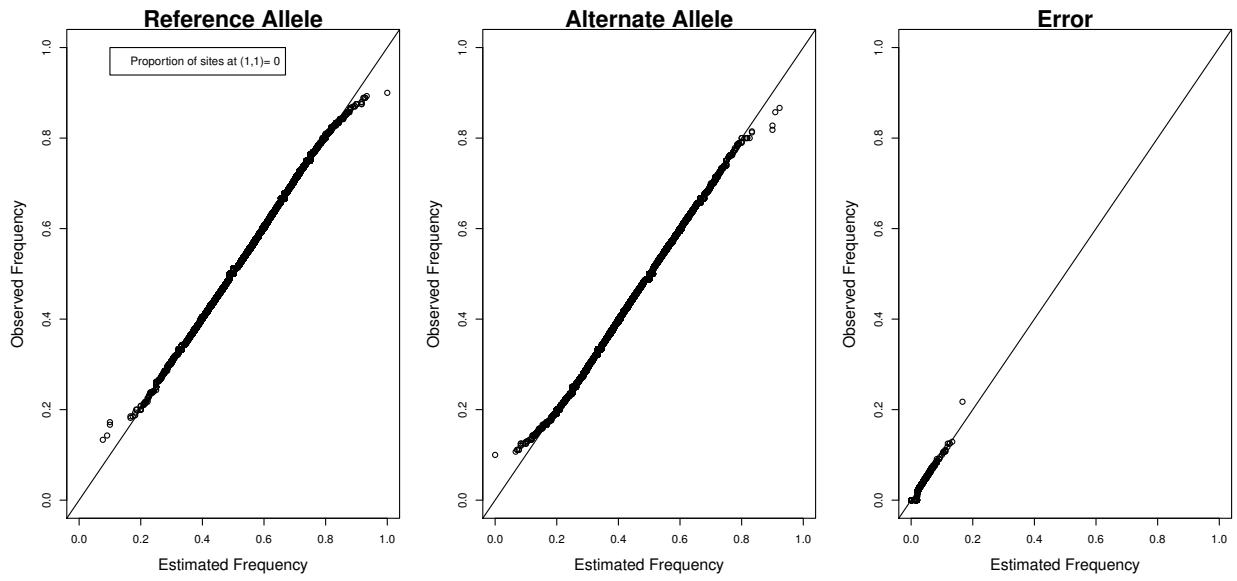

### Mixture of Dirichlet Multinomial CEU10 Chr21 5 components

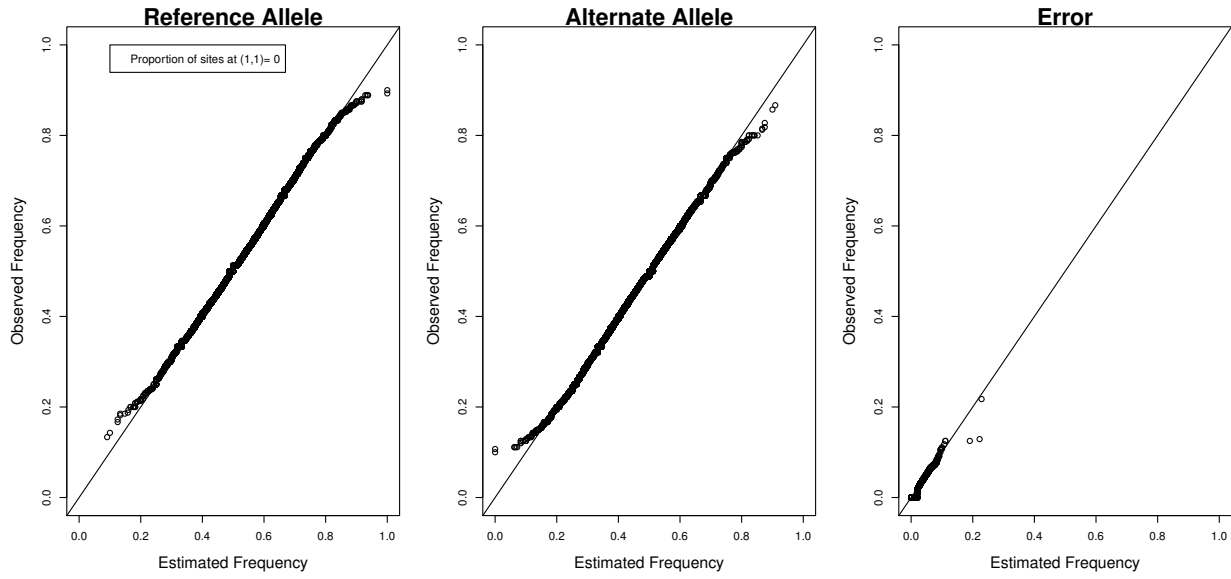

### Mixture of Dirichlet Multinomial CEU10 Chr21 6 components

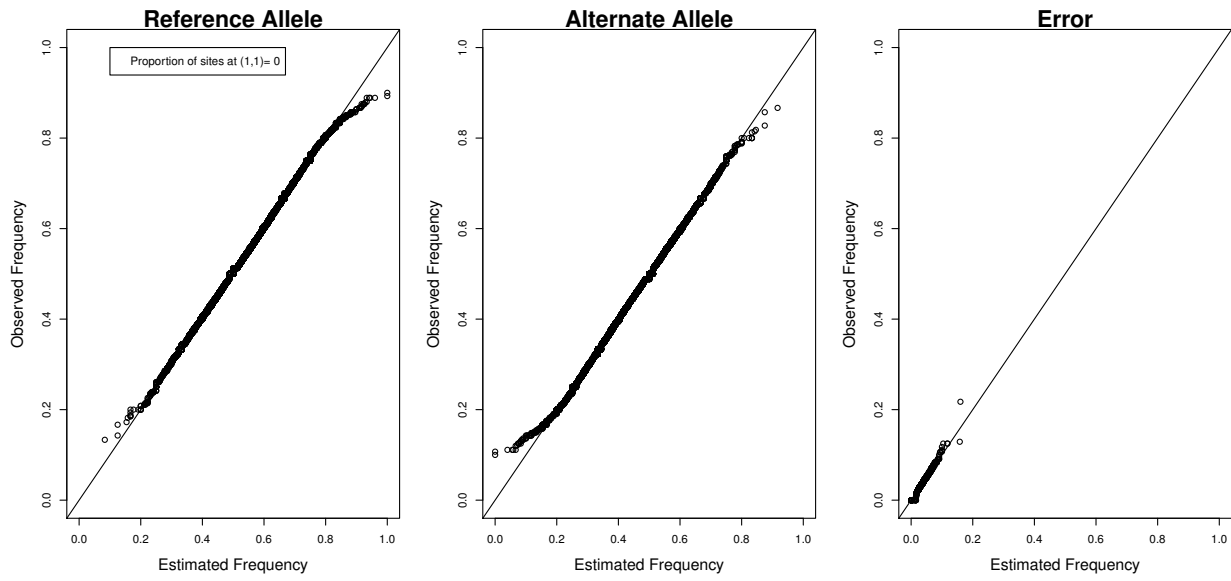

### Multinomial CEU10 Chr10

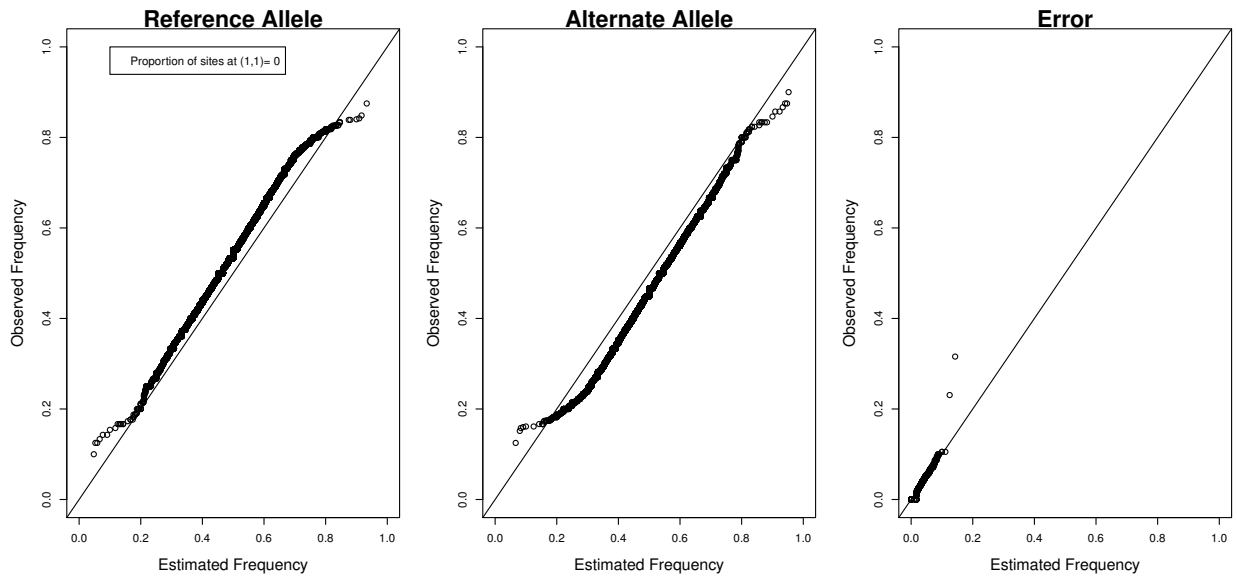

### Biased Multinomial CEU10 Chr10

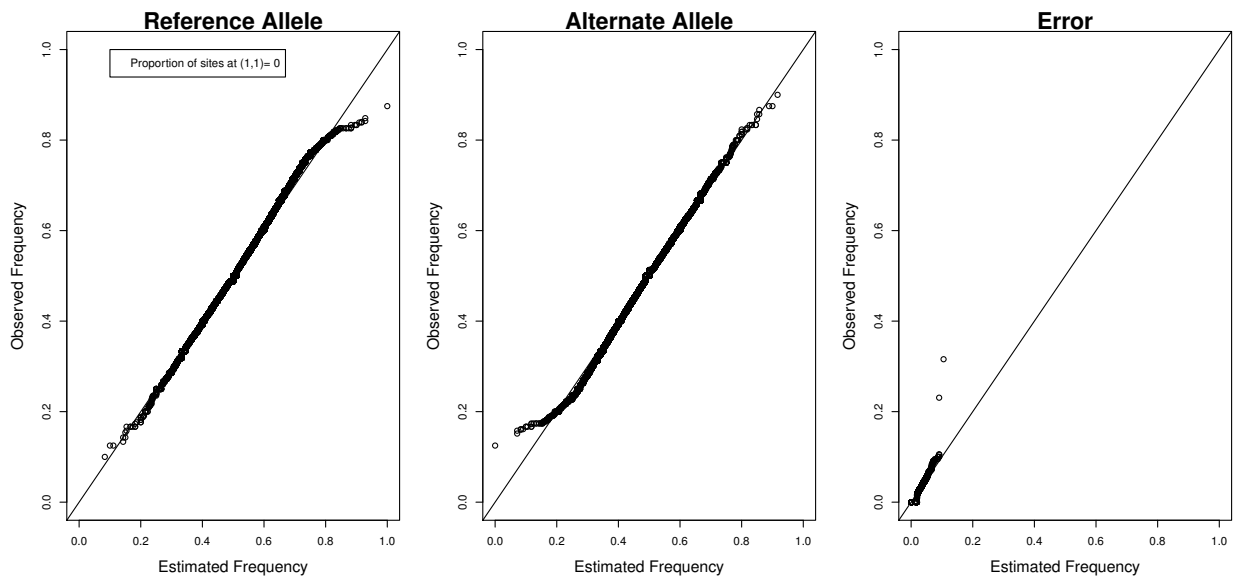



## Dirichlet Multinomial CEU10 Chr10

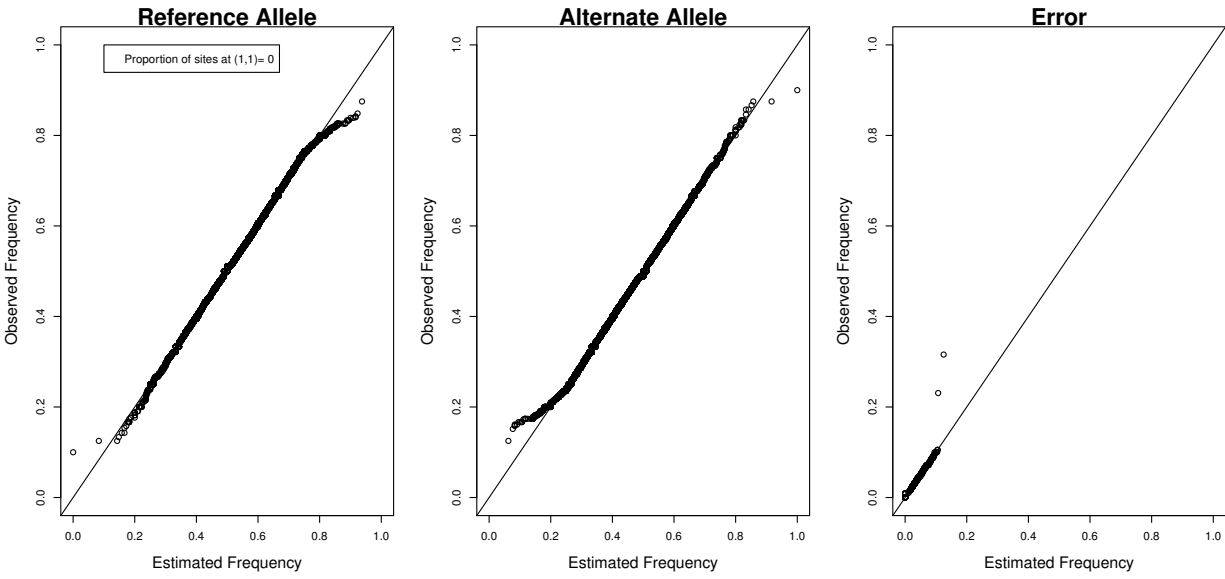

## Mixture of Dirichlet Multinomial CEU10 Chr10 2 components

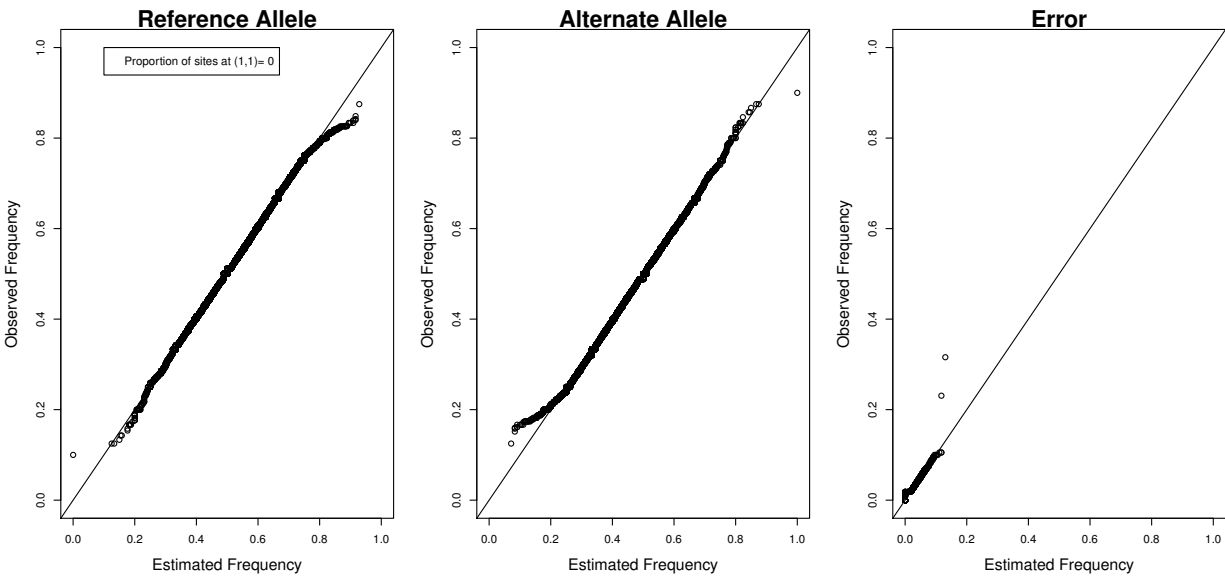

### Mixture of Dirichlet Multinomial CEU10 Chr10 3 components

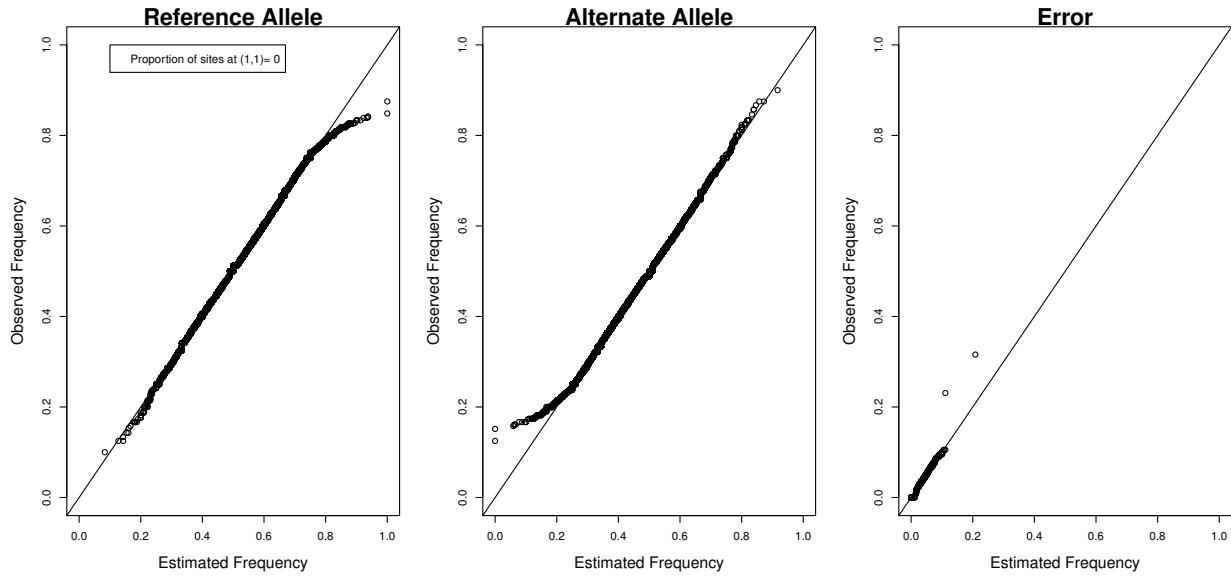

### Mixture of Dirichlet Multinomial CEU10 Chr10 4 components

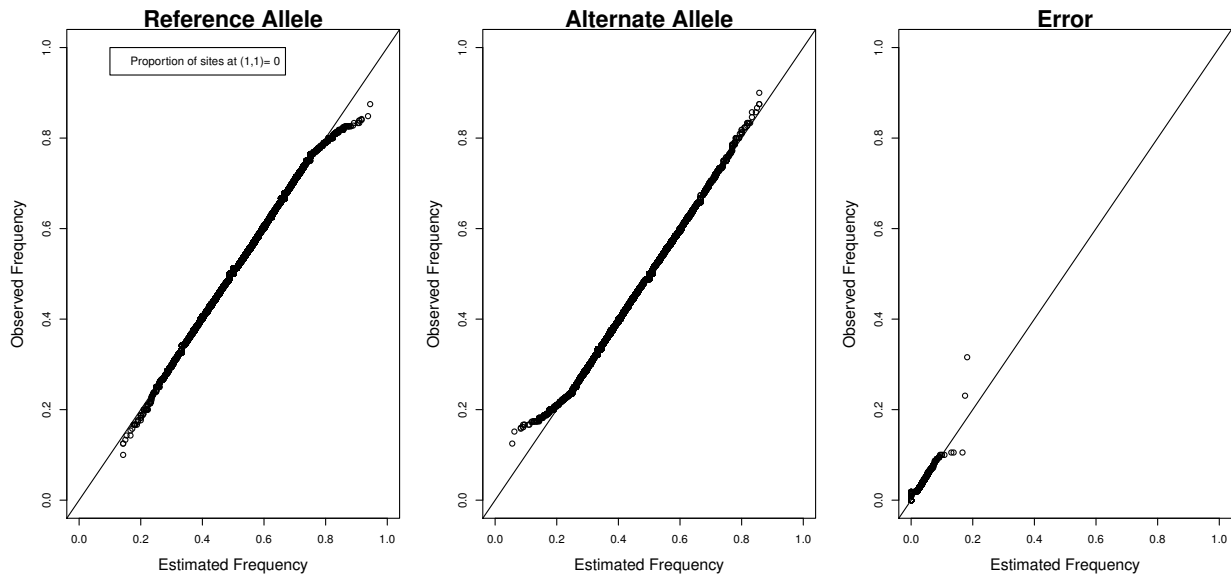

## Mixture of Dirichlet Multinomial CEU10 Chr10 5 components

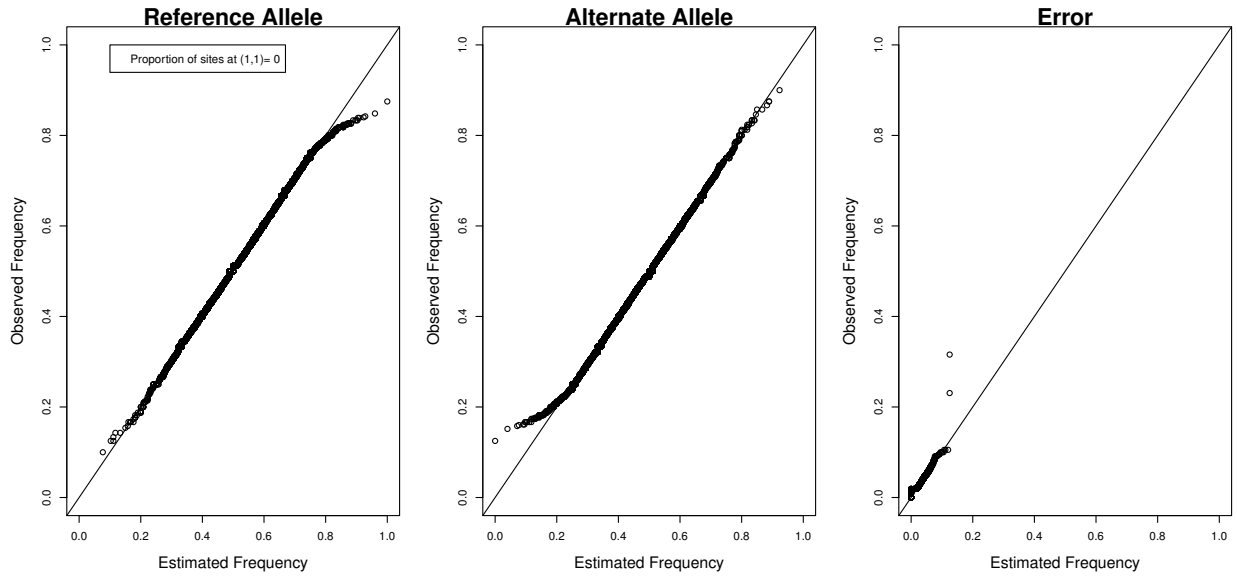

## Mixture of Dirichlet Multinomial CEU10 Chr10 6 components

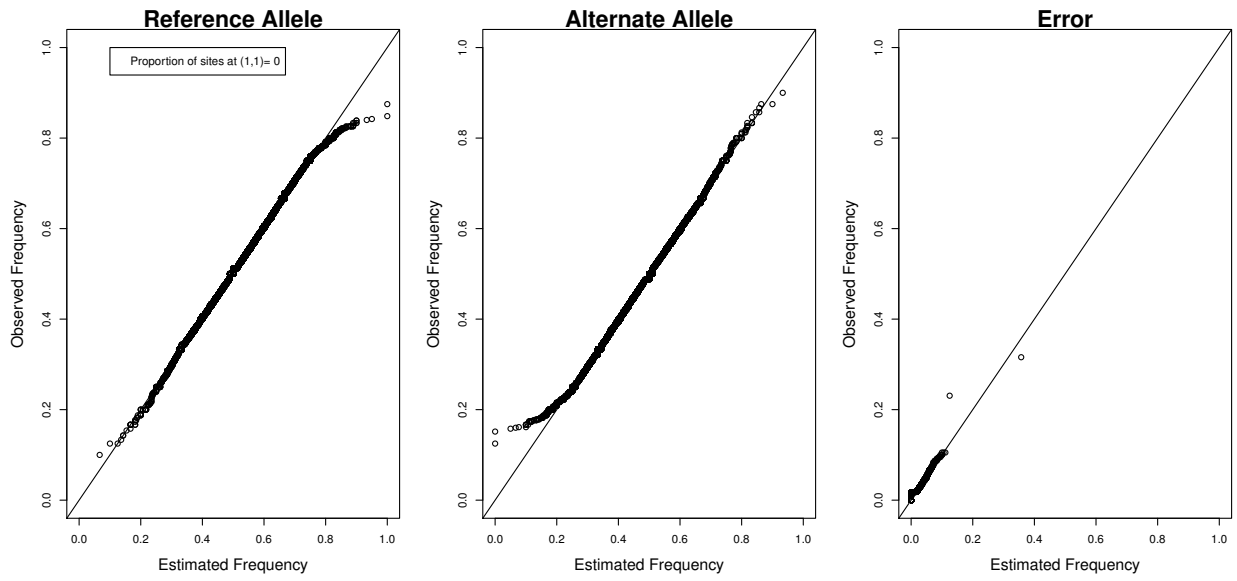

Supplement: Supplementary file [file 031724-1.pdf]
